1 **Genome-wide analysis in 756,646 individuals provides first genetic evidence**  
2 **that *ACE2* expression influences COVID-19 risk and yields genetic risk scores**  
3 **predictive of severe disease**

4  
5 J. E. Horowitz<sup>1†</sup>, J. A. Kosmicki<sup>1†</sup>, A. Damask<sup>1†</sup>, D. Sharma<sup>1</sup>, G. H. L. Roberts<sup>2</sup>, A. E. Justice<sup>3</sup>, N.  
6 Banerjee<sup>1</sup>, M. V. Coignet<sup>2</sup>, A. Yadav<sup>1</sup>, J. B. Leader<sup>3</sup>, A. Marcketta<sup>1</sup>, D. S. Park<sup>2</sup>, R. Lanche<sup>1</sup>, E.  
7 Maxwell<sup>1</sup>, S. C. Knight<sup>2</sup>, X. Bai<sup>1</sup>, H. Guturu<sup>2</sup>, D. Sun<sup>1</sup>, A. Baltzell<sup>2</sup>, F. S. P. Kury<sup>1</sup>, J. D. Backman<sup>1</sup>,  
8 A. R. Girshick<sup>2</sup>, C. O'Dushlaine<sup>1</sup>, S. R. McCurdy<sup>2</sup>, R. Partha<sup>2</sup>, A. J. Mansfield<sup>1</sup>, D. A. Turissini<sup>2</sup>,  
9 A. H. Li<sup>1</sup>, M. Zhang<sup>2</sup>, J. Mbatchou<sup>1</sup>, K. Watanabe<sup>1</sup>, L. Gurski<sup>1</sup>, S. E. McCarthy<sup>1</sup>, H. M. Kang<sup>1</sup>, L.  
10 Dobbyn<sup>1</sup>, E. Stahl<sup>1</sup>, A. Verma<sup>4</sup>, G. Sirugo<sup>4</sup>, Regeneron Genetics Center\*, M. D. Ritchie<sup>4</sup>, M.  
11 Jones<sup>1</sup>, S. Balasubramanian<sup>1</sup>, K. Siminovitch<sup>1</sup>, W. J. Salerno<sup>1</sup>, A. R. Shuldiner<sup>1</sup>, D. J. Rader<sup>4</sup>, T.  
12 Mirshahi<sup>3</sup>, A. E. Locke<sup>1</sup>, J. Marchini<sup>1</sup>, J. D. Overton<sup>1</sup>, D. J. Carey<sup>3</sup>, L. Habegger<sup>1</sup>, M. N. Cantor<sup>1</sup>,  
13 K. A. Rand<sup>2</sup>, E. L. Hong<sup>2</sup>, J. G. Reid<sup>1</sup>, C. A. Ball<sup>2</sup>, A. Baras<sup>1‡</sup>, G. R. Abecasis<sup>1‡</sup>, M. A. Ferreira<sup>1‡</sup>

14  
15 From:

16 <sup>1</sup>Regeneron Genetics Center, 777 Old Saw Mill River Rd., Tarrytown, NY 10591, USA

17 <sup>2</sup>AncestryDNA, 1300 West Traverse Parkway, Lehi, UT 84043, USA

18 <sup>3</sup>Geisinger, Danville, PA, 17822, USA

19 <sup>4</sup>Department of Genetics, Perelman School of Medicine, University of Pennsylvania, Philadelphia,  
20 PA, 19104, USA

21  
22 \*A complete list of investigators is provided in the Supplementary Appendix.

23 † J. E. Horowitz, J. A. Kosmicki and A. Damask contributed equally to this manuscript.

24 ‡A. Baras, G. R. Abecasis and M. A. Ferreira jointly supervised this work.

25 Correspondence to: [manuel.ferreira@regeneron.com](mailto:manuel.ferreira@regeneron.com)

26

27 **This research has been conducted using the UK Biobank Resource (Project 26041)**

28 **ABSTRACT**

29 SARS-CoV-2 enters host cells by binding angiotensin-converting enzyme 2 (ACE2). Through a  
30 genome-wide association study, we show that a rare variant (MAF = 0.3%, odds ratio 0.60,  
31  $P=4.5 \times 10^{-13}$ ) that down-regulates *ACE2* expression reduces risk of COVID-19 disease, providing  
32 human genetics support for the hypothesis that ACE2 levels influence COVID-19 risk. Further,  
33 we show that common genetic variants define a risk score that predicts severe disease among  
34 COVID-19 cases.

35

36 **MAIN TEXT**

37 Severe acute respiratory syndrome coronavirus 2 (SARS-CoV-2) causes coronavirus disease 2019  
38 (COVID-19), which has lead to >3 million deaths worldwide since December 2019 <sup>1</sup>. Reported  
39 risk factors for severe COVID-19, defined here as death or hospitalization combined with  
40 respiratory failure <sup>2</sup>, include male sex, older age, race, obesity, kidney, cardiovascular and  
41 respiratory diseases <sup>3-5</sup>. In this study, we used human genetics to identify genetic variants  
42 associated with severe COVID-19 and tested the utility of genetic risk scores to identify  
43 individuals at highest risk of severe disease.

44  
45 We performed genome-wide association studies (GWAS) of COVID-19 outcomes across 52,630  
46 individuals with COVID-19 and 704,016 individuals with no record of SARS-CoV-2 infection  
47 aggregated from four studies (Geisinger Health System [GHS], Penn Medicine BioBank [PMBB],  
48 UK Biobank [UKB] and AncestryDNA; **Supplementary Table 1**) and five continental ancestries.  
49 Of the COVID-19 cases, 6,911 (13.1%) were hospitalized and 2,184 (4.1%) had severe disease;  
50 hospitalized patients were more likely to be older, of non-European ancestry and to have pre-  
51 existing cardiovascular and lung disease (**Supplementary Table 2**). Using these data, we defined  
52 two groups (risk and severity) of COVID-19 outcomes, ultimately resulting in five case-control  
53 comparisons related to risk of infection and two others related to disease severity among COVID-  
54 19 cases (**Table 1** and **Supplementary Table 3**). For each comparison, we performed ancestry-  
55 specific GWAS in each study and then combined results using a fixed-effects meta-analysis.  
56 Genomic inflation factors ( $\lambda_{GC}$ ) for the meta-analyses were <1.05, suggesting no substantial  
57 impact of population structure or unmodeled relatedness (**Supplementary Table 4**).

58

59 Our analysis provides independent support for several risk variants reported in previous GWAS of  
60 COVID-19 (**Supplementary Table 5**), including those recently reported by the COVID-19 Host  
61 Genetics Initiative (HGI) <sup>6</sup>, to which we contributed an earlier version of these data  
62 (**Supplementary Table 6**). Details for these replicated loci follow below, but first we looked for  
63 novel genetic associations that might have been missed by the HGI. Across the seven risk and  
64 severity phenotypes, considering both common (MAF>0.5%, up to 13 million) and rare  
65 (MAF<0.5%, up to 76 million) variants, we observed one previously unreported association at a  
66 conservative  $P < 8 \times 10^{-11}$  (Bonferroni correction for seven phenotypes x 89 million variants). This  
67 association was between lower risk of infection and rs190509934:C on the X-chromosome  
68 (MAF=0.3%, OR=0.60, 95% CI 0.52-0.69,  $P = 4.5 \times 10^{-13}$ ; **Figure 1A and 1B**). This rare variant is  
69 located on the X chromosome, 60 base pairs upstream of the angiotensin-converting enzyme 2  
70 gene (*ACE2*), the primary cell entry receptor for SARS-CoV-2 <sup>7</sup>.

71  
72 Given the potential significance of these findings, we studied the association between the *ACE2*  
73 variant rs190509934 and COVID-19 outcomes in greater detail. We found that the variant was  
74 well imputed (imputation info score >0.6 for all studies), and that there was no evidence for  
75 differences in effect size (heterogeneity test  $P > 0.05$ ) across studies (**Figure 1C**) or ancestries  
76 (**Supplementary Table 7**). However, a significantly stronger association ( $P = 0.009$ ) was observed  
77 in males (OR=0.49,  $P = 7.0 \times 10^{-11}$ ; explaining 0.085% of the variance in disease liability <sup>8</sup>,  $h^2$ ) when  
78 compared to females (OR=0.72,  $P = 5 \times 10^{-4}$ ;  $h^2 = 0.017\%$ ). There were no associations between  
79 rs190509934 and clinical risk factors for COVID-19 after correcting for multiple testing  
80 (**Supplementary Table 8**), suggesting that these were not likely confounders in the analysis. We  
81 then investigated the association between rs190509934 and severity among COVID-19 cases, and

82 found that carriers of rs190509934:C had numerically (but not significantly) lower risk of worse  
83 disease outcomes when compared to non-carriers (**Supplementary Table 9**). These results  
84 demonstrate that rs190509934 near *ACE2* confers protection against SAR-CoV-2 infection and  
85 potentially also modulates disease severity among infected individuals; since the variant is rare, a  
86 definite account of its role on disease severity will require larger numbers of severe cases.

87 We speculated that the protective rare variant near *ACE2* (rs190509934:C) might regulate *ACE2*  
88 expression. This variant was not characterized by GTEx<sup>9</sup> or other gene expression studies we  
89 queried (**Supplementary Table 10**). Thus, to test its association with *ACE2* expression, we  
90 analyzed RNA-seq data from liver tissue available in a subset of 2,035 individuals from the GHS  
91 study, including eight heterozygous and one hemizygous carrier for rs190509934:C. After  
92 adjusting for potential confounders (e.g. body mass index, liver disease), we found that  
93 rs190509934:C reduced *ACE2* expression by 0.87 standard deviation units (95% CI -1.18 to -0.57,  
94  $P=2.7 \times 10^{-8}$ ; **Figure 1D**). When considering raw, pre-normalized *ACE2* expression levels,  
95 rs190509934:C was associated with a 39% reduction in expression relative to non-carriers. There  
96 was no association with the expression of 12 other nearby genes (within 500 kb) after accounting  
97 for multiple testing. These results are consistent with rs190509934:C lowering *ACE2* expression,  
98 which in turn confers protection from SARS-CoV-2 infection.

99 In addition to its role in viral infections, the normal physiologic role of ACE2 involves  
100 its hydrolysis and clearance of angiotensin II, a vasoconstrictive peptide that can lead to higher  
101 vascular tone or blood pressure<sup>10</sup>. Therefore, we investigated if rs190509934:C was associated  
102 with higher systolic blood pressure in the UKB study, but found no significant association  
103 (beta=0.009 SD-units,  $P=0.56$ ; **Supplementary Table 11**). There was a trend for higher blood

104 pressure among carriers of ultra-rare coding variants in *ACE2* that are predicted to be full loss-of-  
105 function (beta=0.219,  $P=0.086$ ; **Supplementary Table 11**), assayed through exome-sequencing  
106 as described previously <sup>11</sup>. These results need to be confirmed in larger datasets, but suggest that  
107 *ACE2* loss-of-function may modestly increase blood pressure. This should be considered if *ACE2*  
108 blockade is to be developed for COVID-19 treatment, although pharmacologic inhibition of *ACE2*  
109 in such a setting would be expected to be short term and elevations in blood pressure could be  
110 managed with anti-hypertensives. Of note, *ACE2* expression in the airways was reported to be  
111 higher in smokers and patients with COPD <sup>12</sup> and to increase with age <sup>13</sup>. Collectively, these  
112 observations and our genetic findings are consistent with the hypothesis that *ACE2* levels play a  
113 key role in determining COVID-19 risk.

114 As noted, our GWAS also identified associations at several loci reported in previous GWAS of  
115 COVID-19 outcomes. To explore previously reported signals in detail, we first attempted to  
116 replicate eight independent associations ( $r^2<0.05$ ) with disease risk (**Supplementary Table 5**)  
117 reported in three recent GWAS that included >1,000 cases (**Supplementary Table 6**). After  
118 accounting for multiple testing, six variants had a significant ( $P<0.0012$ ) and directionally  
119 consistent association in at least one of our five disease risk analyses (**Supplementary Table 12**),  
120 specifically those located in/near *LZTFL1*, *SLC6A20*, *MHC*, *ABO*, *DPP9* and *IFNAR2*. There was  
121 no evidence for heterogeneity in effect sizes across studies (**Supplementary Table 12**) or  
122 ancestries (**Supplementary Table 13**). We also explored the possibility that the association  
123 between these six variants and COVID-19 risk could have been confounded by disease status for  
124 relevant comorbidities. We found that only two of the six variants were modestly associated with  
125 a clinical risk factor (**Supplementary Table 8**), and we conclude that it is unlikely that the

126 association between the six variants and risk of COVID-19 is explained by these underlying  
127 comorbidities.

128 To evaluate whether genetics could be used to predict severe disease, we first investigated which  
129 replicated variants were associated with severity amongst COVID-19 cases. Among the six  
130 replicated variants (in/near *LZTFL1*, *SLC6A20*, MHC, *ABO*, *DPP9* and *IFNAR2*), four were  
131 significantly ( $P < 0.05$ ) associated with worse outcomes among infected individuals (in/near  
132 *LZTFL1*, MHC, *DPP9* and *IFNAR2*), while those in *ABO* and near *SLC6A20* did not associate with  
133 COVID-19 severity (**Supplementary Figure 1B** and **Supplementary Table 14**). Collectively,  
134 these results highlight four variants associated with both COVID-19 risk and worse disease  
135 outcomes, including respiratory failure and death. These variants may be used to identify  
136 individuals at risk of severe COVID-19 and to guide the search for genes involved in the  
137 pathophysiology of COVID-19.

138  
139 We next evaluated whether variants identified by the COVID-19 HGI, a large worldwide effort to  
140 identify genetic risk factors for COVID-19, could augment this set of four disease severity variants.  
141 The latest HGI analyses<sup>6</sup> include data from 49,562 SARS-CoV-2 infected individuals and use >1.7  
142 million individuals with no record of infection as controls (**Supplementary Table 15**). To identify  
143 additional variants associated with severity, we started with variants associated with the phenotype  
144 “reported infection” (infected vs. no record of infection) which, despite the sample overlap  
145 between the HGI and our analyses, is statistically independent from severity among infected  
146 individuals – since infection status (positive vs. negative or unknown) is uncorrelated with  
147 hospitalization status once infected (hospitalized vs. not hospitalized). We found that two were  
148 nominally associated with risks of hospitalization or severe disease among cases (rs11919389 near

149 *RPL24* and rs1886814 near *FOXP4*; **Supplementary Table 15**), suggesting that these loci also  
150 modulate disease severity after infection with SARS-CoV-2.

151  
152 Collectively, our association analyses highlighted six common variants identified in previous  
153 GWAS or by the HGI - in/near *LZTFL1*, MHC, *DPP9*, *IFNAR2*, *RPL24* and *FOXP4* - that are  
154 associated with risk of COVID-19 as well as disease severity among cases. To help identify genes  
155 that might underlie the observed associations, we searched for functional protein-coding variants  
156 (missense or predicted loss-of-function) in high LD ( $r^2 > 0.80$ ) with each variant. We found eight  
157 functional variants in five genes (**Supplementary Table 16**): *IFNAR2*, a cytokine receptor  
158 component in the anti-viral type 1 interferon pathway, which is activated by SARS-CoV-2 and is  
159 dysregulated in severe COVID-19 cases <sup>14-16</sup>; *CCHCR1*, a P-body protein associated with  
160 cytoskeletal remodeling and mRNA turnover <sup>17,18</sup>; *TCF19*, a transcription factor associated with  
161 hepatitis B <sup>19</sup>; and *C6orf15* and *PSORS1C1*, two functionally uncharacterized genes in the MHC.  
162 These data indicate that the risk variants identified may have functional effects on these five genes.

163  
164 Next, we asked if any of the six sentinel risk variants co-localized (*i.e.* were in high LD,  $r^2 > 0.80$ )  
165 with published sentinel expression quantitative trait loci (eQTL) across 52 studies  
166 (**Supplementary Table 10**), specifically focusing on 114 genes in *cis* ( $\pm 500$  kb). We found co-  
167 localization with sentinel eQTL for eight genes (**Supplementary Table 17**): *SLC6A20* (eQTL  
168 from lung), a proline transporter that binds the host SARS-CoV-2 receptor, *ACE2* <sup>20</sup>; *NXPE3*  
169 (esophagus), a gene of unknown function; *SEN7* (blood), a SUMO-specific protease that promotes  
170 interferon signaling and that in mice is essential for innate defense against herpes simplex virus 1  
171 infection<sup>21</sup>; *IFNAR2* and *TCF19* (multiple tissues), both discussed above; *LST1* (blood), an



172 immune modulatory protein that inhibits lymphocyte proliferation<sup>22</sup> and is upregulated in response  
173 to bacterial ligands<sup>23</sup>; *HLA-C* (adipose), a natural killer cell ligand, associated with viral infection  
174<sup>24</sup> and autoimmunity<sup>25</sup>; and *IL10RB* (multiple tissues), a pleotropic cytokine receptor associated  
175 with persistent hepatitis B and autoimmunity<sup>26,27</sup>.

176 Collectively, analysis of missense variation and eQTL catalogs suggests 12 potential effector genes  
177 in COVID-19 loci (*ACE2*, *C6orf15*, *CCHCR1*, *HLA-C*, *IFNAR2*, *IL10RB*, *LST1*, *NXPE3*,  
178 *PSORS1C1*, *SENP7*, *SLC6A20* and *TCL19*), though functional studies are required to confirm  
179 these predictions.

180 Next, we proceeded to evaluate if common genetic variants can help identify individuals at high  
181 risk of severe disease. Specifically, we focused on the six variants (in/near *LZTFL1*, *MHC*, *DPP9*,  
182 *IFNAR2*, *RPL24* and *FOXP4*) that associated with both risk of COVID-19 and disease severity  
183 among infected individuals. Using these variants, we created a weighted genetic risk score (GRS)  
184 for individuals with COVID-19 and then compared the risk of hospitalization and severe disease  
185 between those with a high GRS and all other cases, after adjusting for established risk factors. The  
186 weights used for each variant corresponded to the effect size (log of the odds ratio) reported in  
187 previous GWAS. When considering COVID-19 cases of European ancestry (N=44,958), we found  
188 that having a high GRS (top 10%) was associated with a 1.38-fold increased risk of hospitalization  
189 (95% CI 1.26 to 1.53,  $P=6 \times 10^{-11}$ ; **Figure 2A**) and 1.58-fold increased risk of severe disease (95%  
190 CI 1.36 to 1.82,  $P=7 \times 10^{-10}$ ; **Figure 2B**). In other ancestries, a high GRS also appeared to predict  
191 risk of hospitalization – including among individuals of African ancestry (N=2,598, 1.70-fold risk  
192 for high GRS, 95% CI 1.03 to 2.81,  $P=0.038$ ), Admixed American ancestry (N=3,752, 1.56-fold  
193 risk, 95% CI 1.00 to 2.43,  $P = 0.05$ ) and South Asian ancestry (N=760, 1.42-fold risk, 95% CI

194 0.72 to 2.82,  $P = 0.32$ , **Supplementary Table 18**). A similar pattern was observed for risk of  
195 severe disease, though sample sizes were considerably smaller (**Supplementary Tables 19**).

196

197 We then compared the effect of the GRS between individuals with and without established risk  
198 factors for severe COVID-19. In Europeans of both the AncestryDNA and UK Biobank studies,  
199 we found that a high GRS (top 10%) was associated with risk of severe disease both among  
200 individuals with and without established clinical risk factors for severe COVID-19 (**Figure 3**). In  
201 the meta-analysis of the two studies, a high GRS was associated with a 1.65-fold (95% CI 1.39-  
202 1.96,  $P=1 \times 10^{-8}$ ) and 1.75-fold (95% CI 1.28-2.40,  $P=4 \times 10^{-4}$ ) higher risk of severe disease,  
203 respectively among individuals with and without established risk factors (**Supplementary Table**  
204 **20**). There was no evidence for heterogeneity of GRS effect with clinical risk factor status  
205 ( $P=0.30$ ). Similar results were observed for (i) risk of hospitalization (**Supplementary Figure 2**  
206 and **Supplementary Table 20**); (ii) when including in the GRS all 12 variants reported to associate  
207 with risk of COVID-19 in previous GWAS (eight variants) and by the HGI (four novel variants  
208 associated with reported infection; **Supplementary Figure 3**); and (iii) in individuals of Admixed  
209 American ancestry (**Supplementary Figure 4**; stratified analysis not performed in other  
210 ancestries due to small sample size). Lastly, we also found that expanding the GRS to include a  
211 larger set of variants did not improve the observed associations (**Supplementary Figure 5**).  
212 Overall, these results demonstrate that a GRS calculated using variants associated with disease risk  
213 and severity can potentially be used to identify COVID-19 cases at high risk of developing poor  
214 disease outcomes. We note that preeminent factor for severe COVID-19 outcomes remains age (as  
215 illustrated in **Supplementary Figure 6**), but that common genetic variants appear to provide  
216 complementary information that may be used to stratify risk among older individuals.

217

218 The following caveats should be considered when interpreting results from this study. First, our  
219 study had greater power to identify associations with disease risk than with severity outcomes,  
220 given the relatively small sample size for the latter. Second, there was phenotypic heterogeneity  
221 among COVID-19 cases and controls and associated risk factors across our studies. One likely  
222 reason for this is that survey respondents from the AncestryDNA study were enriched for healthier  
223 individuals and milder COVID-19 cases, when compared to participants of the UKB, GHS and  
224 PMBB studies, who were ascertained in clinical settings and so were enriched for hospitalized and  
225 severe COVID-19 cases. Other sources of heterogeneity may include regional and temporal  
226 availability of COVID-19 testing and the inability to control for viral exposure among controls.  
227 While our meta-analysis collectively spans a broad phenotypic spectrum, these individual  
228 differences may account for variability in results across reported studies. Third, we used expression  
229 levels measured in liver to assess the impact of the ACE2 risk variant on gene expression. Liver is  
230 not the most relevant tissue to assess *ACE2* expression, but we note that cis eQTLs are often shared  
231 across tissues<sup>9,28</sup>. Fourth, the association between GRS and risk of severe disease was strongest in  
232 European individuals of the AncestryDNA (OR=1.72,  $P=2 \times 10^{-6}$ ) and UKB (OR=1.65,  $P=6 \times 10^{-6}$ )  
233 studies when compared to the smaller GHS study (OR=1.03,  $P=0.877$ ). The lower effect size in  
234 the latter may be due to differences in ascertainment of COVID-19 positive cases, as discussed  
235 above, or stochastic, given the smaller sample size. We also noted that the impact of the GRS on  
236 risk of hospitalization was attenuated in comparison to severe disease, which may be a reflection  
237 of the weighting schema for the variants comprising the score; the four largest GRS weights were  
238 derived from an analysis of critically ill individuals.

239

240 In summary, we confirmed six common variant associations with risk of infection and further show  
241 that four of these variants modulate disease severity among cases. We also identified one novel  
242 association with disease risk which provides human genetic support for the hypothesis that ACE2  
243 expression plays a key role SARS-CoV-2 infection and may constitute an attractive therapeutic  
244 target for prevention COVID-19 disease and its sequelae. Lastly, we demonstrate that a genetic  
245 risk score based on common variants validated in this study can be used to identify individuals at  
246 high risk of poor disease outcomes.

247 **ONLINE METHODS**

248 **Participating Studies**

249 *AncestryDNA COVID-19 Research Study*. AncestryDNA customers over age 18, living in the  
250 United States, and who had consented to research, were invited to complete a survey assessing  
251 COVID-19 outcomes and other demographic information. These included SARS-CoV-2 swab and  
252 antibody test results, COVID-19 symptoms and severity, brief medical history, household and  
253 occupational exposure to SARS-CoV-2, and blood type. A total of 163,650 AncestryDNA survey  
254 respondents were selected for inclusion in this study<sup>29</sup>. Respondents selected for this study  
255 included all individuals with a positive COVID-19 test together with age and sex matched controls.  
256 DNA samples were genotyped as described previously<sup>29</sup>. Genotype data for variants not included  
257 in the array were then inferred using imputation to the Haplotype Reference Consortium (HRC)  
258 reference panel. Briefly, samples were imputed to HRC version 1.1, which consists of 27,165 total  
259 individuals and 36 million variants. The HRC reference panel does not include indels;  
260 consequently, indels are not present in the imputed data. We determined best-guess haplotypes  
261 with Eagle version 2.4.1 and performed imputation with Minimac4 version 1.0.1. We used  
262 1,117,080 unique variants as input and 8,049,082 imputed variants were retained in the final data  
263 set. Variants with a Minimac4  $R^2 < 0.30$  were filtered from the analysis.

264

265 *Geisinger Health System (GHS)*. The GHS MyCode Community Health Initiative is a health  
266 system-based cohort from central and eastern Pennsylvania (USA) with ongoing recruitment since  
267 2006<sup>30</sup>. A subset of 144,182 MyCode participants sequenced as part of the GHS-Regeneron  
268 Genetics Center DiscovEHR partnership were included in this study. Information on COVID-19  
269 outcomes were obtained through GHS's COVID-19 registry. Patients were identified as eligible

270 for the registry based on relevant lab results and ICD-10 diagnosis codes; patient charts were then  
271 reviewed to confirm COVID-19 diagnoses. The registry contains data on outcomes, comorbidities,  
272 medications, supplemental oxygen use, and ICU admissions. DNA from participants was  
273 genotyped on either the Illumina OmniExpress Exome (OMNI) or Global Screening Array (GSA)  
274 and imputed to the TOPMed reference panel (stratified by array) using the TOPMed Imputation  
275 Server. Prior to imputation, we retained variants that had a MAF  $\geq 0.1\%$ , missingness  $< 1\%$  and  
276 HWE  $p$ -value  $> 10^{-15}$ . Following imputation, data from the OMNI and GSA datasets were merged  
277 for subsequent association analyses, which included an OMNI/GSA batch covariate, in addition  
278 to other covariates described below.

279

280 *Penn Medicine BioBank (PMBB) study.* PMBB contains ~70,000 study participants, all recruited  
281 through the University of Pennsylvania Health System (UPHS). Participants donate blood or tissue  
282 and allow access to EHR information<sup>31</sup>. The PMBB participants with COVID-19 infection were  
283 identified through the UPHS COVID-19 registry, which consists of qPCR results of all patients  
284 tested for SARS-CoV-2 infection within the health system. We then used electronic health records  
285 to classify COVID-19 patients into hospitalized and severe (ventilation or death) categories. DNA  
286 genotyping was performed with the Illumina Global Screening Array, and imputation performed  
287 using the TOPMed reference panel as described for GHS above.

288

289 *UK Biobank (UKB) study.* We studied the host genetics of SARS-CoV-2 infection in participants  
290 of the UK Biobank study, which took place between 2006 and 2010 and includes approximately  
291 500,000 adults aged 40-69 at recruitment. In collaboration with UK health authorities, the UK  
292 Biobank has made available regular updates on COVID-19 status for all participants, including

293 results from four main data types: qPCR test for SARS-CoV-2, anonymized electronic health  
294 records, primary care and death registry data. We report results based on phenotype data  
295 downloaded on the 4th January 2021 and excluded from the analysis 28,547 individuals with a  
296 death registry event prior to 2020. DNA samples were genotyped as described previously<sup>32</sup> using  
297 the Applied Biosystems UK BiLEVE Axiom Array (N=49,950) or the closely related Applied  
298 Biosystems UK Biobank Axiom Array (N=438,427). Genotype data for variants not included in  
299 the arrays were inferred using the TOPMed reference panel, as described above.

300

### 301 **COVID-19 phenotypes used for genetic association analyses**

302 We grouped participants from each study into three broad COVID-19 disease categories  
303 (**Supplementary Table 1**): (i) positive – those with a positive qPCR or serology test for SARS-  
304 CoV-2, or with a COVID-19-related ICD10 code (U07), hospitalization or death; (ii) negative –  
305 those with only negative qPCR or serology test results for SARS-CoV-2 and with no COVID-19-  
306 related ICD10 code (U07), hospitalization or death; and (iii) unknown – those with no qPCR or  
307 serology test results and no COVID-19-related ICD10 code (U07), hospitalization or death. We  
308 then used these broad COVID-19 disease categories, in addition to hospitalization and disease  
309 severity information, to create seven COVID-19-related phenotypes for genetic association  
310 analyses, as detailed in **Supplementary Table 3**.

311 SARS-CoV-2 infection status (positive, negative or unknown) was determined based on a  
312 qPCR test for SARS-CoV-2 in the UKB, GHS and PMBB studies; self-reported results for qPCR  
313 or serology test for SARS-CoV-2 in the AncestryDNA study.

314 Hospitalization status (positive, negative or unknown) was determined based on COVID-  
315 19-related ICD10 codes U071, U072, U073 in variable ‘diag\_icd10’ (table ‘hesin\_diag’) in the

316 UKB study; self-reported hospitalization due to COVID-19 in the AncestryDNA study; medical  
317 records in the GHS and PMBB studies.

318 Disease severity status (severe [ventilation or death] or not severe) was determined in the  
319 UKB study based on (i) respiratory support ICD10 code Z998 in variable ‘diag\_icd10’ (table  
320 ‘hesin\_diag’); (ii) the following respiratory support ICD10 codes in variable ‘oper4’ (table  
321 ‘hesin\_oper’): E85, E851, E852, E853, E854, E855, E856, E858, E859, E87, E871, E872, E873,  
322 E874, E878, E879, E89, X56, X561, X562, X563, X568, X569, X58, X581, X588, X589; or (3)  
323 COVID-19-related ICD10 codes U071, U072, U073 in cause of death (variable ‘cause\_icd10’ in  
324 table ‘death\_cause’). In the AncestryDNA study, disease severity was determined based on self-  
325 reported ventilation or need for supplementary oxygen due to COVID-19. In the GHS and PMBB  
326 study, it was determined based on ventilator or high-flow oxygen use.

327 For association analysis in the AncestryDNA study, we excluded from the COVID-19  
328 unknown group individuals who had (i) a first-degree relative who was COVID-19 positive; or (ii)  
329 flu-like symptoms.

330

### 331 **Genetic association analyses**

332 Association analyses in each study were performed using the genome-wide Firth logistic  
333 regression test implemented in REGENIE<sup>33</sup>. In this implementation, Firth’s approach is applied  
334 when the p-value from standard logistic regression score test is below 0.05. We included in step 1  
335 of REGENIE (*i.e.* prediction of individual trait values based on the genetic data) directly  
336 genotyped variants with a minor allele frequency (MAF) >1%, <10% missingness, Hardy-  
337 Weinberg equilibrium test  $P$ -value >  $10^{-15}$  and linkage-disequilibrium (LD) pruning (1000 variant  
338 windows, 100 variant sliding windows and  $r^2 < 0.9$ ). The association model used in step 2 of



339 REGENIE included as covariates age, age<sup>2</sup>, sex, age-by-sex, and the first 10 ancestry-informative  
340 principal components (PCs) derived from the analysis of a stricter set of LD-pruned (50 variant  
341 windows, 5 variant sliding windows and  $r^2 < 0.5$ ) common variants from the array (imputed for the  
342 GHS study) data.

343         Within each study, association analyses were performed separately for five different  
344 continental ancestries defined based on the array data: African (AFR), Admixed American (AMR),  
345 European (EUR) and South Asian (SAS). We determined continental ancestries by projecting each  
346 sample onto reference principle components calculated from the HapMap3 reference panel.  
347 Briefly, we merged our samples with HapMap3 samples and kept only SNPs in common between  
348 the two datasets. We further excluded SNPs with MAF < 10%, genotype missingness > 5% or  
349 Hardy-Weinberg Equilibrium test p-value < 10<sup>-5</sup>. We calculated PCs for the HapMap3 samples  
350 and projected each of our samples onto those PCs. To assign a continental ancestry group to each  
351 non-HapMap3 sample, we trained a kernel density estimator (KDE) using the HapMap3 PCs and  
352 used the KDEs to calculate the likelihood of a given sample belonging to each of the five  
353 continental ancestry groups. When the likelihood for a given ancestry group was > 0.3, the sample  
354 was assigned to that ancestry group. When two ancestry groups had a likelihood > 0.3, we  
355 arbitrarily assigned AFR over EUR, AMR over EUR, AMR over EAS, SAS over EUR, and AMR  
356 over AFR. Samples were excluded from analysis if no ancestry likelihoods were > 0.3, or if more  
357 than three ancestry likelihoods were > 0.3.

358         Results were subsequently meta-analyzed across studies and ancestries using an inverse  
359 variance-weighted fixed-effects meta-analysis.

360

361 **Identification of putative targets of GWAS variants based on colocalization with eQTL**

362 We identified as a likely target of a sentinel GWAS variant any gene for which a sentinel  
363 expression quantitative trait locus (eQTL) co-localized (*i.e.* had LD  $r^2 > 0.80$ ) with the sentinel  
364 GWAS variant. That is, we only considered genes for which there was strong LD between a  
365 sentinel GWAS variant and a sentinel eQTL, which reduces the chance of spurious colocalization.  
366 Sentinel eQTL were defined across 174 published datasets (**Supplementary Table 10**), as  
367 described previously<sup>34</sup>. We did not use statistical approaches developed to distinguish  
368 colocalization from shared genetic effects because these have very limited resolution at high LD  
369 levels ( $r^2 > 0.80$ )<sup>35</sup>.

370

### 371 **Gene expression analysis in participants of the GHS study**

372 For a subset of individuals from the GHS study (n=2,035, ascertained through the Geisinger  
373 Bariatric Surgery Clinic), RNA was extracted from liver biopsies conducted during bariatric  
374 surgery to evaluate liver disease. Individuals had class 3 obesity (BMI>40kg/m<sup>2</sup>) or class 2 obesity  
375 (BMI 35-39 kg/m<sup>2</sup>) with an obesity-related co-morbidity (e.g. type-2 diabetes, hypertension, sleep  
376 apnea, non-alcoholic fatty liver disease). RNA libraries were prepared using polyA-extraction and  
377 then sequenced with 75bp paired-end reads with two 10 bp index reads on the Illumina NovaSeq  
378 6000 on S4 flow cells. RNA-seq data were then analyzed using the GTEx v8 workflow<sup>36</sup>, using  
379 STAR<sup>37</sup> and RNASeqQC<sup>38</sup>, except that GENCODE v32 was used in lieu of v26. Briefly: (i) raw  
380 expression counts were normalized with TMM (Trimmed Mean of M-values) as implemented in  
381 edgeR<sup>38</sup>; (ii) a rank-based inverse normal transformation was applied to the normalized expression  
382 values; (iii) principal components (PCs) analysis was performed on data from 25,078 genes with  
383 TPM >0.1 in >20% samples, to identify latent factors accounting for variation in gene expression;  
384 (iv) gene expression levels were adjusted for the top 100 PCs to improve power to identify cis-

385 regulatory effects. The association between adjusted *ACE2* expression and the imputed genotypes  
386 of rs190509934 was then tested using REGENIE, with the following variables included as  
387 covariates: age, age<sup>2</sup>, four ancestry-informative principal components, steatosis status, fibrosis  
388 status, diabetes status, and body mass index at the time of bariatric surgery.

389

### 390 **Genetic risk score (GRS) analysis of COVID-19 hospitalization and severity**

391 First, in each study (AncestryDNA, GHS, UKB and PMBB), we created a GRS for each COVID-  
392 19 positive individual based on variants that were reported to associate with risk of COVID-19 in  
393 previous GWAS and that we (i) independently replicated (except variants identified by the HGI);  
394 and (ii) found to be associated with COVID-19 severity outcomes. We used as weights the effect  
395 (beta) reported in previous GWAS (**Supplementary Table 5**). Second, we ranked COVID-19  
396 individuals based on the GRS and created a new binary GRS predictor by assigning each individual  
397 to a high (top 5%) or low (rest of the population) percentile group. Third, for studies with >100  
398 hospitalized cases, we used logistic regression to test the association between the binary GRS  
399 predictor and risk of hospitalization (hospitalized cases vs. all other cases), including as covariates  
400 age, sex, age-by-sex interaction, and ten ancestry-informative PCs. In addition to age and sex, we  
401 included as additional covariates established clinical risk factors for COVID-19 that are outlined  
402 in the Emergency Use Authorisation treatment guidelines for casirivimab and imdevimb: BMI,  
403 chronic kidney disease, diabetes, immunosuppressive disease, chronic obstructive pulmonary  
404 disease or other chronic respiratory disease, cardiovascular disease and hypertension. We repeated  
405 the association analysis (i) using different percentile cut-offs for the GRS (5%, 10%, 20%, 30%  
406 and 40%); and (ii) to test the association with disease severity (severe cases vs. all other cases).  
407 We then stratified COVID-19 cases by clinical risk (high versus lower) and evaluated the

408 association between the top 10% by GRS (i.e. high genetic risk) and risk of hospitalization or  
409 severe disease. The stratified analyses were performed with logistic regression, with sex and  
410 ancestry-informative PCs included as covariates. High clinical risk was defined as any one of the  
411 following: (i) age $\geq$ 65; (ii) BMI $\geq$ 35; (iii) chronic kidney disease, diabetes or immunosuppressive  
412 disease; (iv) age  $\geq$ 55 and presence of chronic obstructive pulmonary disease/other chronic  
413 respiratory disease, cardiovascular disease, or hypertension.

414

#### 415 **Code availability**

416 Upload Agent (v1.5.30) can be found at <https://wiki.dnanexus.com/Downloads#Upload-Agent>.

417 bcl2fastq software (v2.19.0) can be found at

418 [https://support.illumina.com/sequencing/sequencing\\_software/bcl2fastq-conversion-](https://support.illumina.com/sequencing/sequencing_software/bcl2fastq-conversion-)

419 [software.html](https://support.illumina.com/sequencing/sequencing_software/bcl2fastq-conversion-software.html). BWA software (v0.7.17) for read alignment can be found at [420 \[bwa.sourceforge.net\]\(http://bio-bwa.sourceforge.net\). Picard software \(v1.141\) can be found at](http://bio-</a></p></div><div data-bbox=)

421 <https://broadinstitute.github.io/picard/>. Samtools (v1.7) can be found at <http://www.htslib.org>.

422 WeCall (v1.1.2) can be found at <https://github.com/Genomicsplc/wecall>. FastQC (v0.11.8) can

423 be found at <http://www.bioinformatics.babraham.ac.uk/projects/fastqc/>. Bcftools, bgzip, and

424 tabix (v1.7) can be found at <http://www.htslib.org>, bgzip/tabix v1.7. pigz (v2.3.4) can be found at

425 <https://zlib.net/pigz/>. Eagle (v2.4.1) can be found at <https://github.com/poruloh/Eagle>. Minimac4

426 (v1.01) can be found at <https://github.com/statgen/Minimac4>. GLnexus (v0.4.0) can be found at

427 <https://github.com/dnanexus-rnd/GLnexus>. PLINK (v1.90b6.21) can be found at

428 <https://www.cog-genomics.org/plink2/>. PRIMUS can be found at

429 <https://primus.gs.washington.edu/primusweb/>. REGENIE (v2.0.1) can be found at

430 <https://github.com/statgen/METAL>.

431

432 **Data availability**

433 All genotype-phenotype association results reported in this study are available for browsing using  
434 the RGC's COVID-19 Results Browser (<https://rgc-covid19.regeneron.com>). Data access and use  
435 is limited to research purposes in accordance with the Terms of Use ([https://rgc-](https://rgc-covid19.regeneron.com/terms-of-use)  
436 [covid19.regeneron.com/terms-of-use](https://rgc-covid19.regeneron.com/terms-of-use)).

437 **Competing interests**

438 J.E.H., J.A.K., A.D., D.S., N.B, A.Y., A.M., R.L., E.M., X.B., D.S., F.S.P.K., J.D.B., C.O'D.,  
439 A.J.M., D.A.T., A.H.L., J.M., K.W., L.G., S.E.M, H.M.K., L.D., E.S., M.J., S.B., K.S.M, W.J.S.,  
440 A.R.S., A.E.L., J.M., J.O., L.H., M.N.C., J.G.R., A.B., G.R.A., and M.A.F. are current employees  
441 and/or stockholders of Regeneron Genetics Center or Regeneron Pharmaceuticals. G.H.L.R.,  
442 M.V.C., D.S.P., S.C.K. A.Bal., A.R.G., S.R.M., R.P., M.Z., K.A.R., E.L.H., C.A.B. are current  
443 employees at AncestryDNA and may hold equity in AncestryDNA. The other authors declare no  
444 competing interests.

445

446 **Acknowledgements**

447 This research has been conducted using the UK Biobank Resource (Project 26041). The Penn  
448 Medicine BioBank is funded by a gift from the Smilow family, the National Center for Advancing  
449 Translational Sciences of the National Institutes of Health under CTSA Award Number  
450 UL1TR001878, and the Perelman School of Medicine at the University of Pennsylvania. We want  
451 to acknowledge the participants and investigators of the FinnGen study. We thank the  
452 AncestryDNA customers who voluntarily contributed information in the COVID-19 survey.

453 **FIGURES**

A.

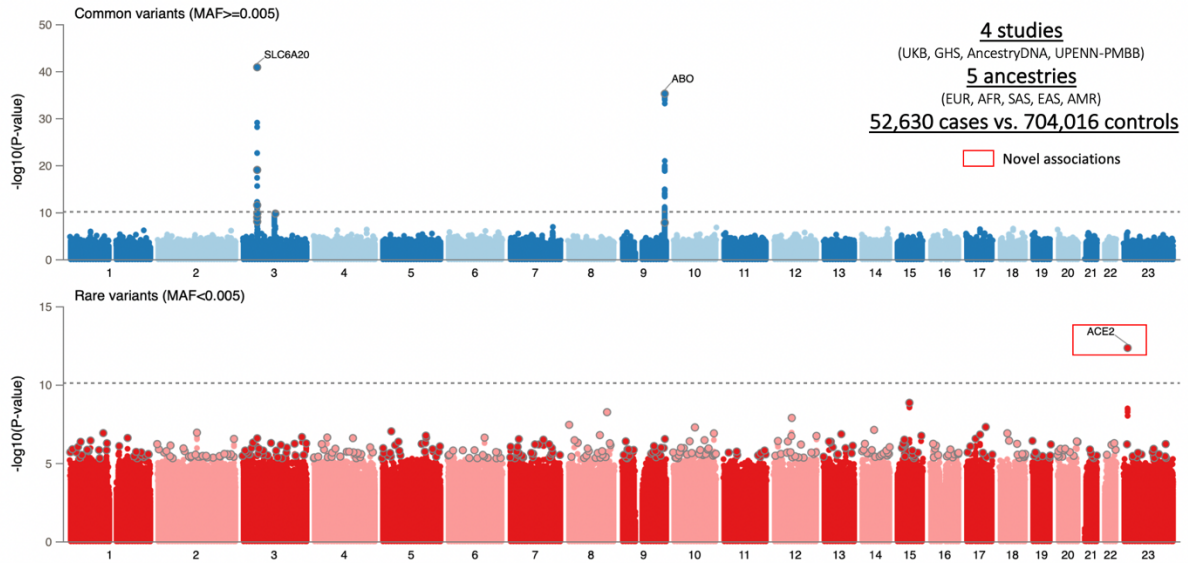

454

B.

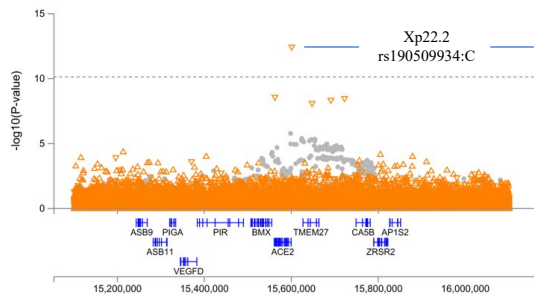

C.

| STUDY                    | N CASES            |    | N CONTROLS             |    | OR [95% CI]              | PVALUE         | AAF           |
|--------------------------|--------------------|----|------------------------|----|--------------------------|----------------|---------------|
|                          | RR R AA            | AA | RR R AA                | AA |                          |                |               |
| UKB_500K_Genotyped_EUR   | 14317 35 2         |    | 420556 1244 509        |    | 0.627 [0.492,0.8]        | 1.7e-04        | 0.0026        |
| UKB_500K_Genotyped_AFR   | 616 3 1            |    | 8721 67 16             |    | 0.783 [0.375,1.636]      | 0.516          | 0.0058        |
| UKB_500K_Genotyped_SAS   | 750 12 1           |    | 9565 217 100           |    | 0.507 [0.325,0.792]      | 0.003          | 0.0219        |
| ANCESTRY_Freeze_Four_EUR | 25306 <100 <100    |    | 113489 327 <100        |    | 0.569 [0.444,0.728]      | 7.5e-06        | 0.002         |
| ANCESTRY_Freeze_Four_AFR | 1622 <100 <100     |    | 5641 <100 <100         |    | 0.392 [0.197,0.78]       | 0.008          | 0.0047        |
| ANCESTRY_Freeze_Four_SAS | <100 <100 <100     |    | 250 <100 <100          |    | 0.359 [0.042,3.071]      | 0.35           | 0.0195        |
| ANCESTRY_Freeze_Four_AMR | 3742 <100 <100     |    | 12281 <100 <100        |    | 0.825 [0.443,1.537]      | 0.545          | 0.0021        |
| UPENN_Freeze_One_EUR     | 40 0 0             |    | 6993 3 3               |    | 0.43 [0.001,187.431]     | 0.786          | 0.0013        |
| UPENN_Freeze_One_AFR     | 347 2 0            |    | 8518 28 18             |    | 0.915 [0.286,2.928]      | 0.881          | 0.0045        |
| GHS_Freeze_145_EUR       | 5267 9 0           |    | 107839 261 68          |    | 0.658 [0.432,1.003]      | 0.052          | 0.0019        |
| GHS_Freeze_145_AFR       | 128 0 0            |    | 3025 14 11             |    | 0.493 [0.126,1.921]      | 0.308          | 0.0057        |
| GHS_Freeze_145_AMR       | 88 0 0             |    | 1296 1 10              |    | 0.304 [0.015,6.097]      | 0.436          | 0.0039        |
| <b>META</b>              | <b>52294 122 8</b> |    | <b>698174 2251 812</b> |    | <b>0.6 [0.522,0.689]</b> | <b>4.5e-13</b> | <b>0.0027</b> |

OR (95% CI)

455

D.

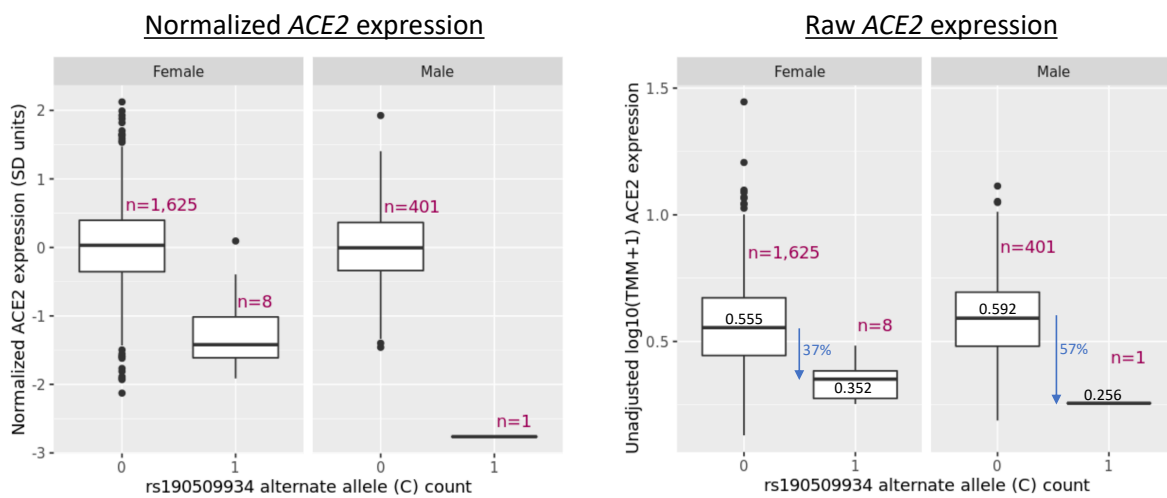

456

457 **Figure 1. GWAS of 52,630 COVID-19 positive cases vs. 704,016 COVID-19 negative or**  
458 **unknown controls identifies a novel association with a rare variant near *ACE2* that lowers**  
459 **gene expression and protects against COVID-19.**

460 **(A)** Summary of association results for common (MAF>0.5%) and rare (MAF<0.5%) variants.

461 **(B)** Regional association plot centered around rs190509934 near *ACE2*.

462 **(C)** Breakdown of association results across studies included in the meta-analysis of  
463 rs190509934.

464 **(D)** Association between rs190509934:C and *ACE2* expression in liver measured in 2,035  
465 individuals from the GHS study.

466



467

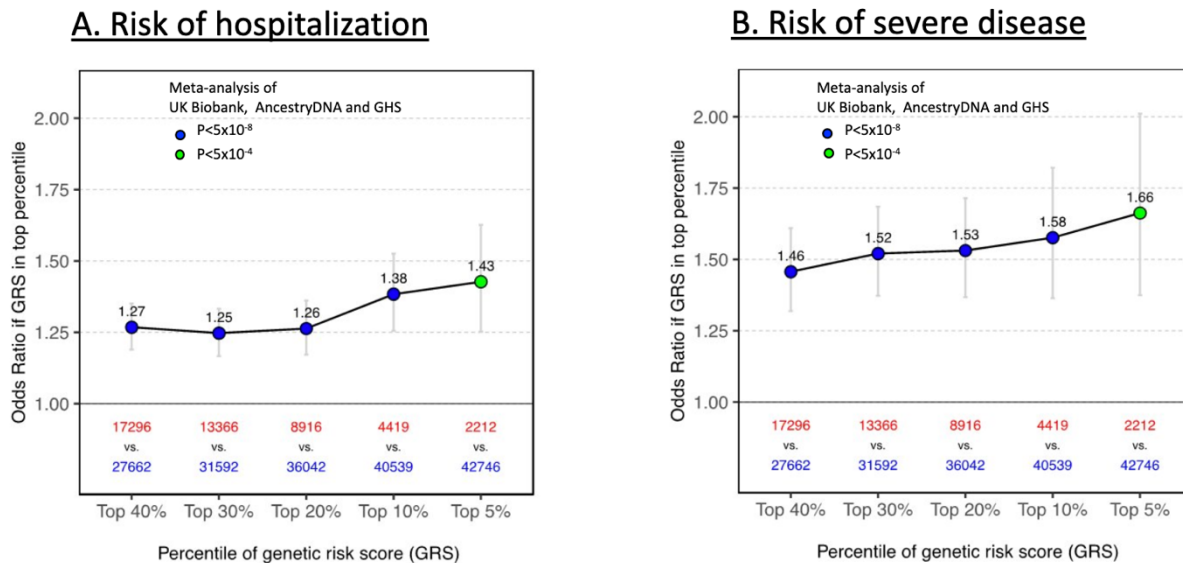

468

469 **Figure 2. Association between a 6-SNP genetic risk score (GRS) and risk of hospitalization**

470 **(A) and severe disease (B) among COVID-19 cases of European ancestry.**

471 **(A)** Association between high genetic risk and hospitalization. Risk of hospitalization among cases

472 is shown for individuals in the top GRS percentile, agnostic to the number of clinical risk factors

473 present. The association was tested in three studies separately (AncestryDNA, UKB and GHS

474 studies) using logistic regression, with established risk factors for COVID-19 included as

475 covariates (see Methods for details). Results were then meta-analyzed across studies, for a

476 combined sample size of 44,958 COVID-19 cases, including 6,138 hospitalized. N in red: number

477 of COVID-19 cases in the top GRS percentile. Error bars represent 95% confidence intervals.

478 **(B)** Association between high genetic risk and severe disease. The association was tested as

479 described above in three studies separately (AncestryDNA, UKB and GHS studies). Results were

480 then meta-analyzed across studies, for a combined sample size of 44,958 COVID-19 cases,

481 including 1,940 with severe disease.

482 N in red: number of COVID-19 cases in the top GRS percentile. N in grey: number of COVID-19  
483 cases in the rest of population.

484

### A. AncestryDNA study

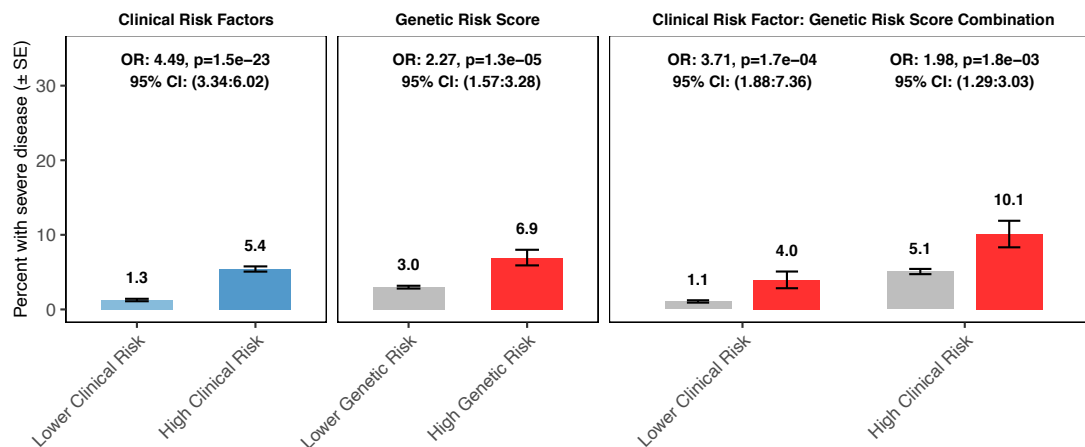

### B. UK Biobank study

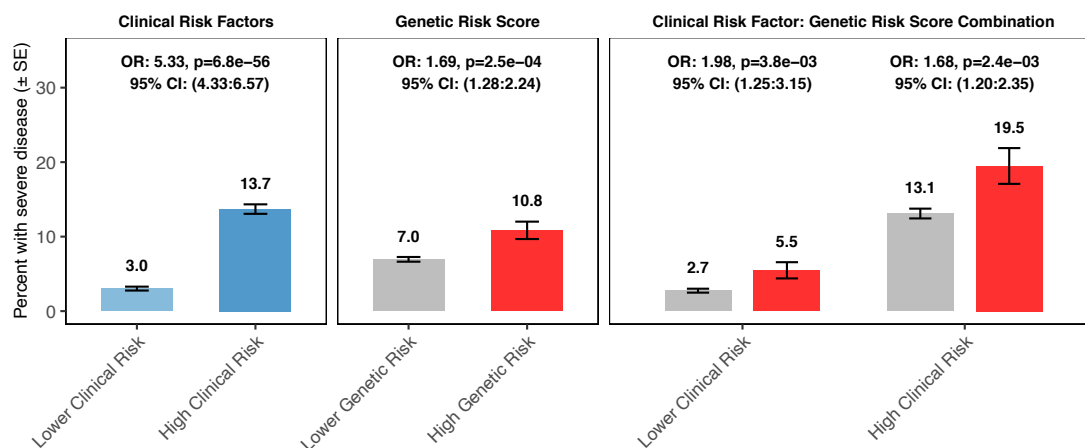

485

486 **Figure 3. Association between a 6-SNP genetic risk score (GRS) and risk of severe disease**  
 487 **among COVID-19 cases of European ancestry after stratifying by the presence of clinical**  
 488 **risk factors.**

489 (A) Rate of severe disease in the AncestryDNA study (25,353 COVID-19 cases, including 667  
 490 with severe disease).

491 (B) Rate of severe disease in the UK Biobank study (14,320 COVID-19 cases, including 951 with  
 492 severe disease).

493 High genetic risk (red bars): top 10% of the GRS. Low genetic risk (grey bars): bottom 90% of the  
 494 GRS (*i.e.* all other COVID-19 cases). Error bars (black) represent 95% confidence intervals.

495 **TABLES**

496

497 **Table 1. Seven COVID-19 phenotypes analyzed in this study.**

| Broad phenotype category                           | Phenotype                                                                     | Description                                               | Group    | Sample size with genetic data |
|----------------------------------------------------|-------------------------------------------------------------------------------|-----------------------------------------------------------|----------|-------------------------------|
| Risk of infection                                  | COVID-19 positive vs. COVID-19 negative or unknown                            | Risk of infection                                         | Cases    | 52,630                        |
|                                                    |                                                                               |                                                           | Controls | 704,016                       |
|                                                    | COVID-19 positive vs. COVID-19 negative                                       | Risk of infection among individuals tested for SARS-CoV-2 | Cases    | 52,630                        |
|                                                    |                                                                               |                                                           | Controls | 109,605                       |
|                                                    | COVID-19 positive and not hospitalized vs. COVID-19 negative or unknown       | Risk of infection that does not require hospitalization   | Cases    | 45,641                        |
|                                                    |                                                                               |                                                           | Controls | 704,016                       |
|                                                    | COVID-19 positive and hospitalized vs. COVID-19 negative or unknown           | Risk of infection that requires hospitalization           | Cases    | 6,911                         |
|                                                    |                                                                               |                                                           | Controls | 689,620                       |
|                                                    | COVID-19 positive and severe vs. COVID-19 negative or unknown                 | Risk of infection with severe outcomes                    | Cases    | 2,184                         |
|                                                    |                                                                               |                                                           | Controls | 689,620                       |
| Risk of severe outcomes among infected individuals | COVID-19 positive and hospitalized vs. COVID-19 positive and not hospitalized | Risk of hospitalization among infected individuals        | Cases    | 6,911                         |
|                                                    |                                                                               |                                                           | Controls | 45,185                        |
|                                                    | COVID-19 positive and severe vs. COVID-19 positive and not hospitalized       | Risk of severe disease among infected individuals         | Cases    | 2,184                         |
|                                                    |                                                                               |                                                           | Controls | 45,185                        |

498

499 **SUPPLEMENTARY FIGURES**

500 Provided in a separate file.

501

502 **Supplementary Figure 1. Comparison of effect sizes across COVID-19 risk and severity**  
503 **outcomes for six previously reported novel risk variants that validated in this study.**

504 Six variants were reported to associatd with risk of COVID-19 in previous studies and replicated  
505 in our analysis. Of these, four variants also associated with disease severity among COVID-19  
506 cases (in/near *LZTFL1*, *CCHCR1*, *DPP9* and *IFNAR2*), whereas two variants did not (in *ABO* and  
507 *SLC6A20*). Error bars represent 95% confidence intervals.

508

509 **Supplementary Figure 2. Association between a 6-SNP genetic risk score (GRS) and risk of**  
510 **hospitalization among COVID-19 cases of European ancestry after stratifying by the**  
511 **presence of clinical risk factors.**

512 (A) Rate of hospitalization in the AncestryDNA study (25,353 COVID-19 cases, including 1,484  
513 hospitalized).

514 (B) Rate of hospitalization in the UK Biobank study (14,320 COVID-19 cases, including 3,878  
515 hospitalized).

516 High genetic risk (red bars): top 10% of the GRS. Low genetic risk (grey bars): bottom 90% of the  
517 GRS (*i.e.* all other COVID-19 cases).

518

519 **Supplementary Figure 3. Association between a 6- and 12-SNP genetic risk score (GRS) and**  
520 **risk of hospitalization and severe disease among COVID-19 cases of European ancestry. To**  
521 **evaluate if the association between the GRS and worse disease outcomes was dependent on the**

522 list of variants selected for analysis, we compared results between GRS calculated using different  
523 sets of variants. We considered a GRS calculated using: (i) the six variants that were reported in  
524 previous GWAS of COVID-19 and that we validated the published association and further showed  
525 that they were associated with risk of hospitalization or severe disease among COVID-19 cases  
526 (in/near *LZTFL1*, *MHC*, *DPP9*, *IFNAR2*, *RPL24* and *FOXP4*; see Supplementary **Figure 1**); or  
527 (ii) all 12 variants reported in previous GWAS of COVID-19 (in/near *LZTFL1* [two variants],  
528 *MHC*, *ABO*, *OAS3*, *DPP9*, *RAVER1*, *IFNAR2*; and four novel risk variants discovered by the HGI  
529 in/near *RPL24*, *DNAH5*, *FOXP4* and *PLEKHA4*; see **Supplementary Tables 5 and 15**). Analyses  
530 were performed separately in the UK Biobank, AncestryDNA and GHS studies (risk of  
531 hospitalization only) after stratifying COVID-19 cases by the presence of clinical risk factors,  
532 considering individuals with lower clinical risk (blue circles), high clinical risk (green triangles)  
533 or all individuals (grey squares). Association results were then meta-analyzed across studies.

534

535 **Supplementary Figure 4. Association between a six-SNP genetic risk score (GRS) and risk**  
536 **of hospitalization (A) and (B) severe disease among COVID-19 cases of Admixed American**  
537 **ancestry.**

538

539 **Supplementary Figure 5. Association between risk of severe disease among COVID-19 cases**  
540 **of European ancestry and genetic risk scores determined based on different criteria.** We  
541 compared GRS based on variants (i) that were reported in the literature and validated in this study  
542 (Literature.HGI.1var: rs73064425 in *LZTFL1*; Literature.HGI.5var: variants from our 6-SNP  
543 model, with the exception of rs73064425 in *LZTFL1*; Literature.HGI.6var: all six variants from  
544 our 6-SNP model); (ii) obtained through pruning and thresholding applied to results from the risk

545 of infection phenotype reported by the HGI, using different association P-value and LD  $r^2$   
546 thresholds; (iii) the LDpred approach <sup>39</sup> applied to risk of infection reported by the HGI,  
547 considering different  $\rho$  parameters.

548

549 **Supplementary Figure 6. Association between risk of severe disease among COVID-19 cases**  
550 **of European ancestry from the UK Biobank study and combination of clinical risk factors,**  
551 **genetic risk (6-SNP GRS model) and age.**

552 **SUPPLEMENTARY TABLES**

553 Provided in a separate file.

554



## 555 References

- 556 1. Zhu, N. *et al.* A Novel Coronavirus from Patients with Pneumonia in China, 2019. *New*  
557 *England Journal of Medicine* **382**, 727-733 (2020).
- 558 2. Guan, W.J. *et al.* Clinical Characteristics of Coronavirus Disease 2019 in China. *N Engl J*  
559 *Med* **382**, 1708-1720 (2020).
- 560 3. Zhou, F. *et al.* Clinical course and risk factors for mortality of adult inpatients with  
561 COVID-19 in Wuhan, China: a retrospective cohort study. *Lancet* **395**, 1054-1062 (2020).
- 562 4. Cummings, M.J. *et al.* Epidemiology, clinical course, and outcomes of critically ill adults  
563 with COVID-19 in New York City: a prospective cohort study. *Lancet* **395**, 1763-1770  
564 (2020).
- 565 5. Lopez, L., 3rd, Hart, L.H., 3rd & Katz, M.H. Racial and Ethnic Health Disparities Related to  
566 COVID-19. *JAMA* (2021).
- 567 6. The COVID-19 Host Genetics Initiative. Mapping the human genetic architecture of  
568 COVID-19 by worldwide meta-analysis. in *medRxiv* (2021).
- 569 7. Zhou, P. *et al.* A pneumonia outbreak associated with a new coronavirus of probable bat  
570 origin. *Nature* **579**, 270-273 (2020).
- 571 8. Pawitan, Y., Seng, K.C. & Magnusson, P.K. How many genetic variants remain to be  
572 discovered? *PLoS One* **4**, e7969 (2009).
- 573 9. Consortium, G.T. The GTEx Consortium atlas of genetic regulatory effects across human  
574 tissues. *Science* **369**, 1318-1330 (2020).
- 575 10. Keidar, S., Kaplan, M. & Gamliel-Lazarovich, A. ACE2 of the heart: From angiotensin I to  
576 angiotensin (1-7). *Cardiovasc Res* **73**, 463-9 (2007).
- 577 11. Van Hout, C.V. *et al.* Exome sequencing and characterization of 49,960 individuals in the  
578 UK Biobank. *Nature* (2020).
- 579 12. Saheb Sharif-Askari, N. *et al.* Airways Expression of SARS-CoV-2 Receptor, ACE2, and  
580 TMPRSS2 Is Lower in Children Than Adults and Increases with Smoking and COPD. *Mol*  
581 *Ther Methods Clin Dev* **18**, 1-6 (2020).
- 582 13. Bunyavanich, S., Do, A. & Vicencio, A. Nasal Gene Expression of Angiotensin-Converting  
583 Enzyme 2 in Children and Adults. *JAMA* **323**, 2427-2429 (2020).
- 584 14. Hadjadj, J. *et al.* Impaired type I interferon activity and inflammatory responses in  
585 severe COVID-19 patients. *Science* **369**, 718-724 (2020).
- 586 15. van der Made, C.I. *et al.* Presence of Genetic Variants Among Young Men With Severe  
587 COVID-19. *JAMA* (2020).
- 588 16. Zhang, Q. *et al.* Inborn errors of type I IFN immunity in patients with life-threatening  
589 COVID-19. *Science* **370**(2020).
- 590 17. Ling, Y.H. *et al.* CCHCR1 interacts with EDC4, suggesting its localization in P-bodies. *Exp*  
591 *Cell Res* **327**, 12-23 (2014).
- 592 18. Tervaniemi, M.H. *et al.* Intracellular signalling pathways and cytoskeletal functions  
593 converge on the psoriasis candidate gene CCHCR1 expressed at P-bodies and  
594 centrosomes. *BMC Genomics* **19**, 432 (2018).
- 595 19. Kim, Y.J. *et al.* A genome-wide association study identified new variants associated with  
596 the risk of chronic hepatitis B. *Hum Mol Genet* **22**, 4233-8 (2013).

- 597 20. Vuille-dit-Bille, R.N. *et al.* Human intestine luminal ACE2 and amino acid transporter  
598 expression increased by ACE-inhibitors. *Amino Acids* **47**, 693-705 (2015).
- 599 21. Cui, Y. *et al.* SENP7 Potentiates cGAS Activation by Relieving SUMO-Mediated Inhibition  
600 of Cytosolic DNA Sensing. *PLoS Pathog* **13**, e1006156 (2017).
- 601 22. Rollinger-Holzinger, I. *et al.* LST1: a gene with extensive alternative splicing and  
602 immunomodulatory function. *J Immunol* **164**, 3169-76 (2000).
- 603 23. Mulcahy, H., O'Rourke, K.P., Adams, C., Molloy, M.G. & O'Gara, F. LST1 and NCR3  
604 expression in autoimmune inflammation and in response to IFN-gamma, LPS and  
605 microbial infection. *Immunogenetics* **57**, 893-903 (2006).
- 606 24. Apps, R. *et al.* Influence of HLA-C expression level on HIV control. *Science* **340**, 87-91  
607 (2013).
- 608 25. Kulkarni, S. *et al.* Genetic interplay between HLA-C and MIR148A in HIV control and  
609 Crohn disease. *Proc Natl Acad Sci U S A* **110**, 20705-10 (2013).
- 610 26. Begue, B. *et al.* Defective IL10 signaling defining a subgroup of patients with  
611 inflammatory bowel disease. *Am J Gastroenterol* **106**, 1544-55 (2011).
- 612 27. Frodsham, A.J. *et al.* Class II cytokine receptor gene cluster is a major locus for hepatitis  
613 B persistence. *Proc Natl Acad Sci U S A* **103**, 9148-53 (2006).
- 614 28. Qi, T. *et al.* Identifying gene targets for brain-related traits using transcriptomic and  
615 methylomic data from blood. *Nat Commun* **9**, 2282 (2018).
- 616 29. Roberts, G.H.L. AncestryDNA COVID-19 Host Genetic Study Identifies Three Novel Loci.  
617 *medRxiv* (2020).
- 618 30. Dewey, F.E. *et al.* Distribution and clinical impact of functional variants in 50,726 whole-  
619 exome sequences from the DiscovEHR study. *Science* **354**(2016).
- 620 31. Park, J. *et al.* A genome-first approach to aggregating rare genetic variants in LMNA for  
621 association with electronic health record phenotypes. *Genet Med* **22**, 102-111 (2020).
- 622 32. Bycroft, C. *et al.* The UK Biobank resource with deep phenotyping and genomic data.  
623 *Nature* **562**, 203-209 (2018).
- 624 33. Mbatchou, J. *et al.* Computationally efficient whole-genome regression for quantitative  
625 and binary traits. *Nature Genetics* (2021).
- 626 34. Ferreira, M.A. *et al.* Shared genetic origin of asthma, hay fever and eczema elucidates  
627 allergic disease biology. *Nat Genet* **49**, 1752-1757 (2017).
- 628 35. Chun, S. *et al.* Limited statistical evidence for shared genetic effects of eQTLs and  
629 autoimmune-disease-associated loci in three major immune-cell types. *Nat Genet* **49**,  
630 600-605 (2017).
- 631 36. Consortium, G.T. The Genotype-Tissue Expression (GTEx) project. *Nat Genet* **45**, 580-5  
632 (2013).
- 633 37. Dobin, A. *et al.* STAR: ultrafast universal RNA-seq aligner. *Bioinformatics* **29**, 15-21  
634 (2013).
- 635 38. Robinson, M.D. & Oshlack, A. A scaling normalization method for differential expression  
636 analysis of RNA-seq data. *Genome Biol* **11**, R25 (2010).
- 637 39. Vilhjalmsson, B.J. *et al.* Modeling Linkage Disequilibrium Increases Accuracy of Polygenic  
638 Risk Scores. *Am J Hum Genet* **97**, 576-92 (2015).
- 639

## MAIN FIGURES

A.

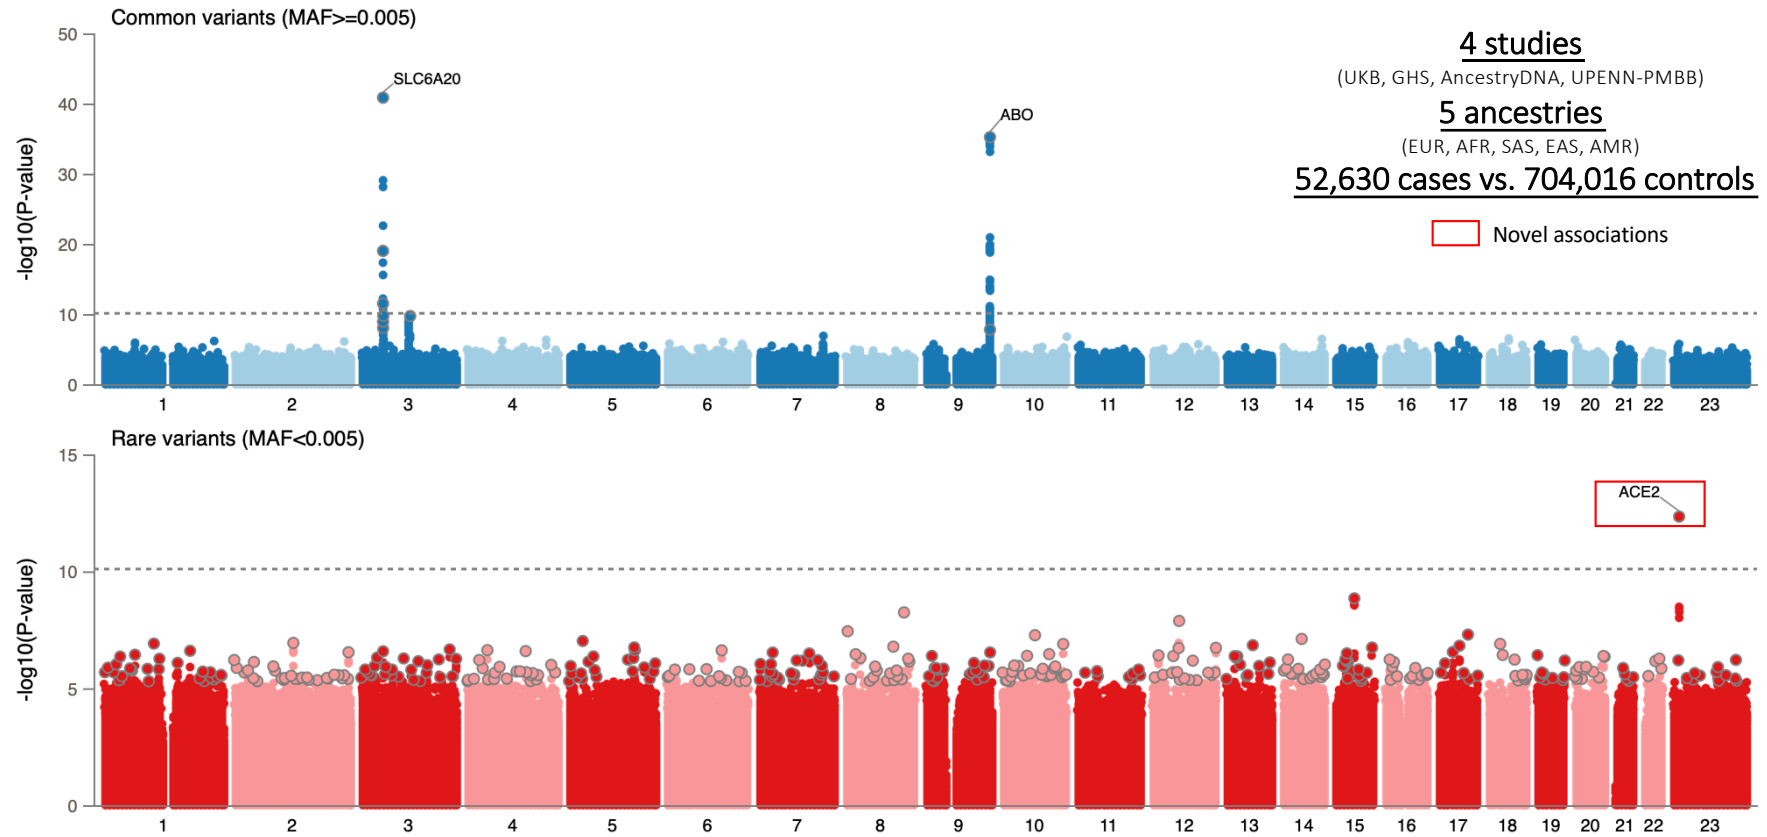

**Figure 1.** GWAS of 52,630 COVID-19 positive cases vs. 704,016 COVID-19 negative or unknown controls identifies a novel association with a rare variant near *ACE2* that lowers gene expression and protects against COVID-19.

(A) Summary of association results for common (MAF  $>$  0.5%) and rare (MAF  $<$  0.5%) variants.

B.

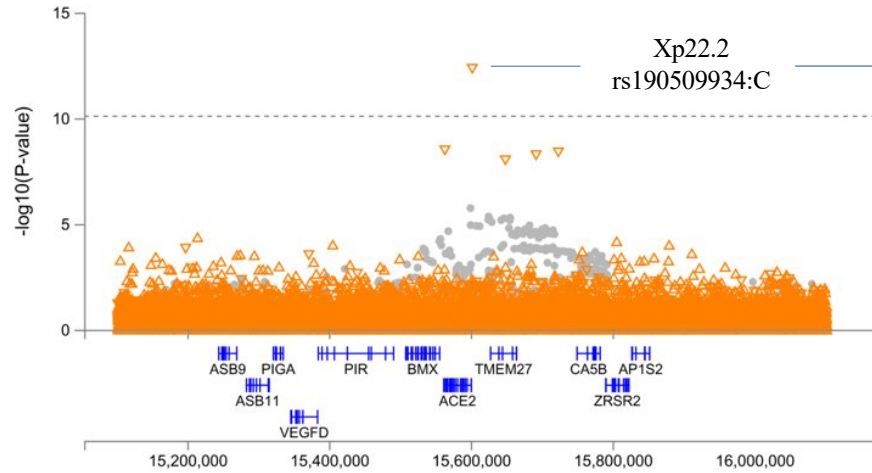

C.

| STUDY                    | N CASES            |  | N CONTROLS             |  | OR [95% CI]              | PVALUE         | AAF           |
|--------------------------|--------------------|--|------------------------|--|--------------------------|----------------|---------------|
|                          | RR RA AA           |  | RR RA AA               |  |                          |                |               |
| UKB_500K_Genotyped_EUR   | 14317 35 2         |  | 420556 1244 509        |  | 0.627 [0.492,0.8]        | 1.7e-04        | 0.0026        |
| UKB_500K_Genotyped_AFR   | 616 3 1            |  | 8721 67 16             |  | 0.783 [0.375,1.636]      | 0.516          | 0.0058        |
| UKB_500K_Genotyped_SAS   | 750 12 1           |  | 9565 217 100           |  | 0.507 [0.325,0.792]      | 0.003          | 0.0219        |
| ANCESTRY_Freeze_Four_EUR | 25306 <100 <100    |  | 113489 327 <100        |  | 0.569 [0.444,0.728]      | 7.5e-06        | 0.002         |
| ANCESTRY_Freeze_Four_AFR | 1622 <100 <100     |  | 5641 <100 <100         |  | 0.392 [0.197,0.78]       | 0.008          | 0.0047        |
| ANCESTRY_Freeze_Four_SAS | <100 <100 <100     |  | 250 <100 <100          |  | 0.359 [0.042,3.071]      | 0.35           | 0.0195        |
| ANCESTRY_Freeze_Four_AMR | 3742 <100 <100     |  | 12281 <100 <100        |  | 0.825 [0.443,1.537]      | 0.545          | 0.0021        |
| UPENN_Freeze_One_EUR     | 40 0 0             |  | 6993 3 3               |  | 0.43 [0.001,187.431]     | 0.786          | 0.0013        |
| UPENN_Freeze_One_AFR     | 347 2 0            |  | 8518 28 18             |  | 0.915 [0.286,2.928]      | 0.881          | 0.0045        |
| GHS_Freeze_145_EUR       | 5267 9 0           |  | 107839 261 68          |  | 0.658 [0.432,1.003]      | 0.052          | 0.0019        |
| GHS_Freeze_145_AFR       | 128 0 0            |  | 3025 14 11             |  | 0.493 [0.126,1.921]      | 0.308          | 0.0057        |
| GHS_Freeze_145_AMR       | 88 0 0             |  | 1296 11 0              |  | 0.304 [0.015,6.097]      | 0.436          | 0.0039        |
| <b>META</b>              | <b>52294 122 8</b> |  | <b>698174 2251 812</b> |  | <b>0.6 [0.522,0.689]</b> | <b>4.5e-13</b> | <b>0.0027</b> |

**Figure 1 (cont).** GWAS of 52,630 COVID-19 positive cases vs. 704,016 COVID-19 negative or unknown controls identifies a rare variant near ACE2 that lowers gene expression and protects against COVID-19.

(B) Regional association plot centered around rs190509934 near ACE2.

(C) Breakdown of association results across studies included in the meta-analysis of rs190509934.

D.

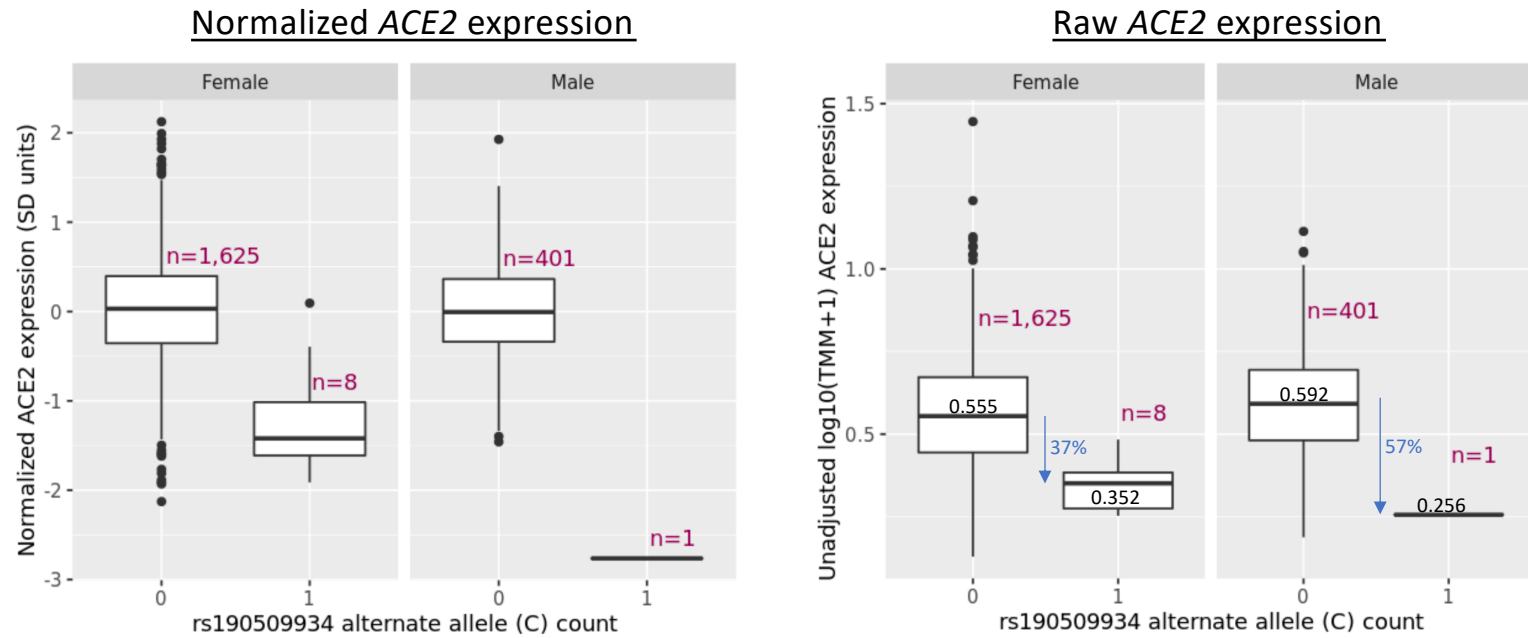

**Figure 1 (cont).** GWAS of 52,630 COVID-19 positive cases vs. 704,016 COVID-19 negative or unknown controls identifies a rare variant near ACE2 that lowers gene expression and protects against COVID-19.

(D) Association between rs190509934:C and ACE2 expression in liver measured in 2,035 individuals (80% female) from the GHS study.

### A. Risk of hospitalization

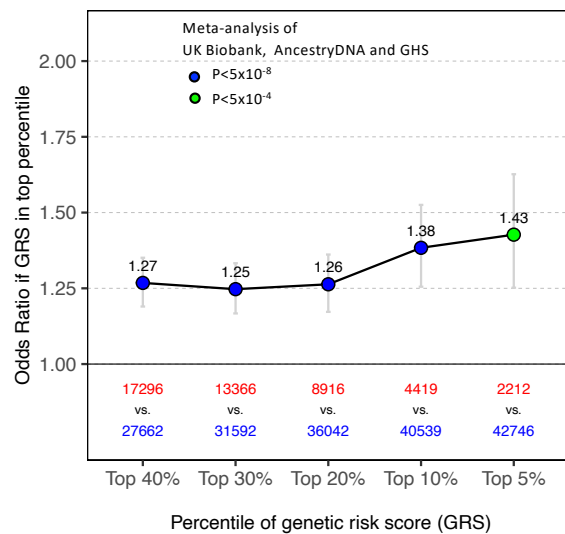

### B. Risk of severe disease

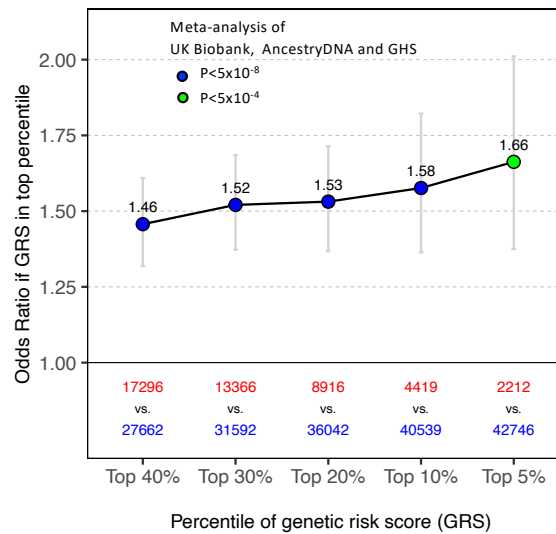

**Figure 2.** Association between a 6-SNP genetic risk score (GRS) and risk of hospitalization (A) and severe disease (B) among COVID-19 cases of European ancestry (N=44,958).

### A. AncestryDNA study

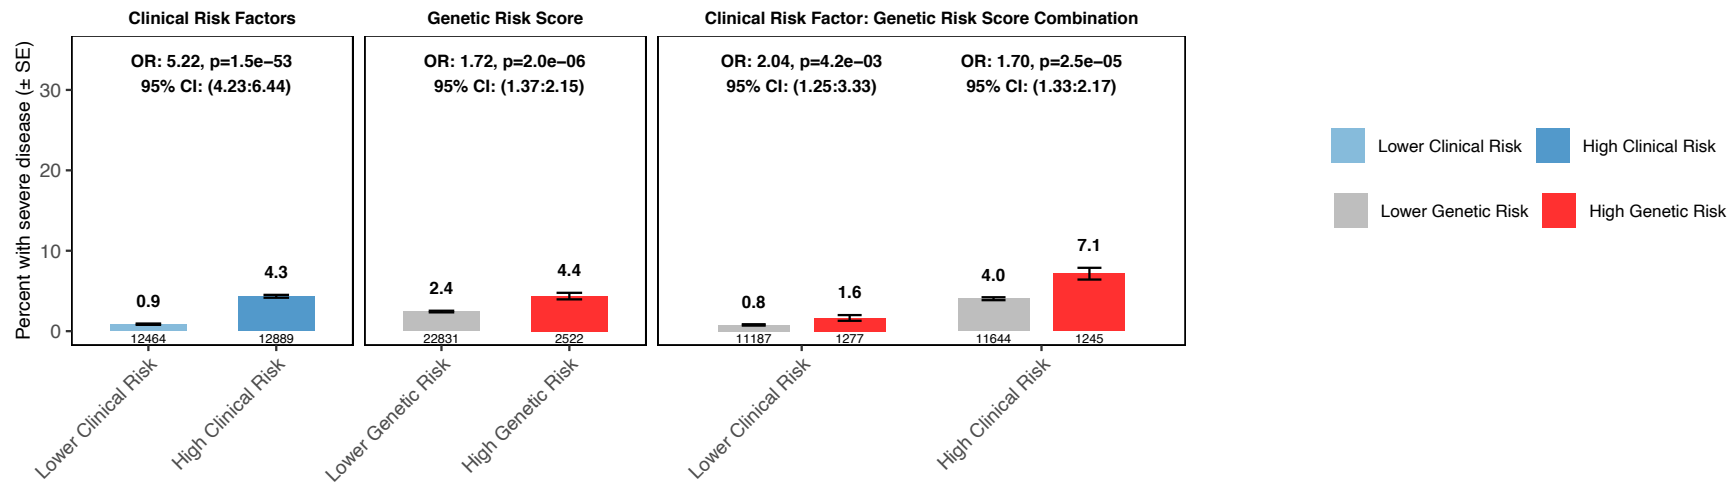

### B. UK Biobank study

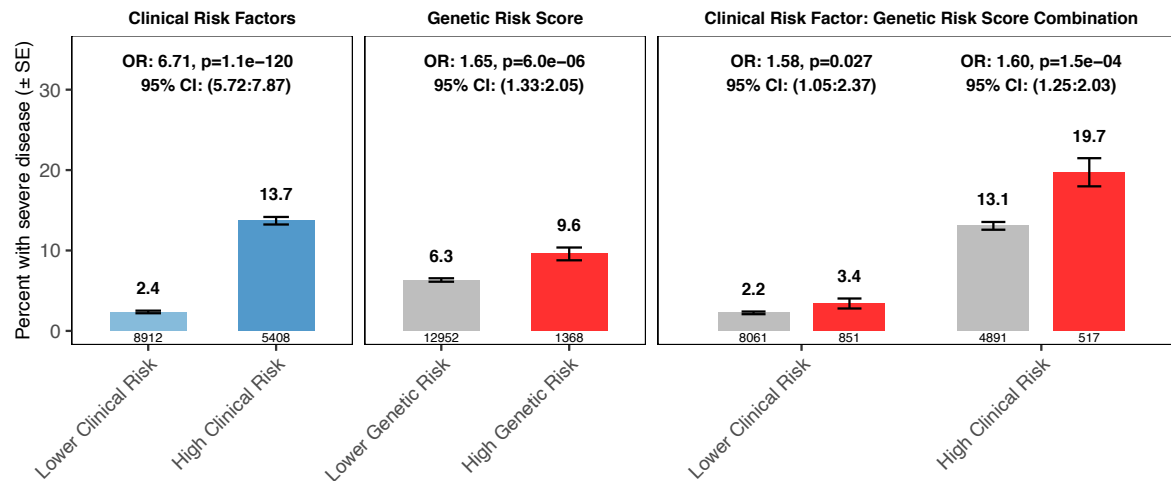

**Figure 3.** Association between a 6-SNP genetic risk score (GRS) and risk of severe disease among COVID-19 cases of European ancestry.



## SUPPLEMENTARY FIGURES

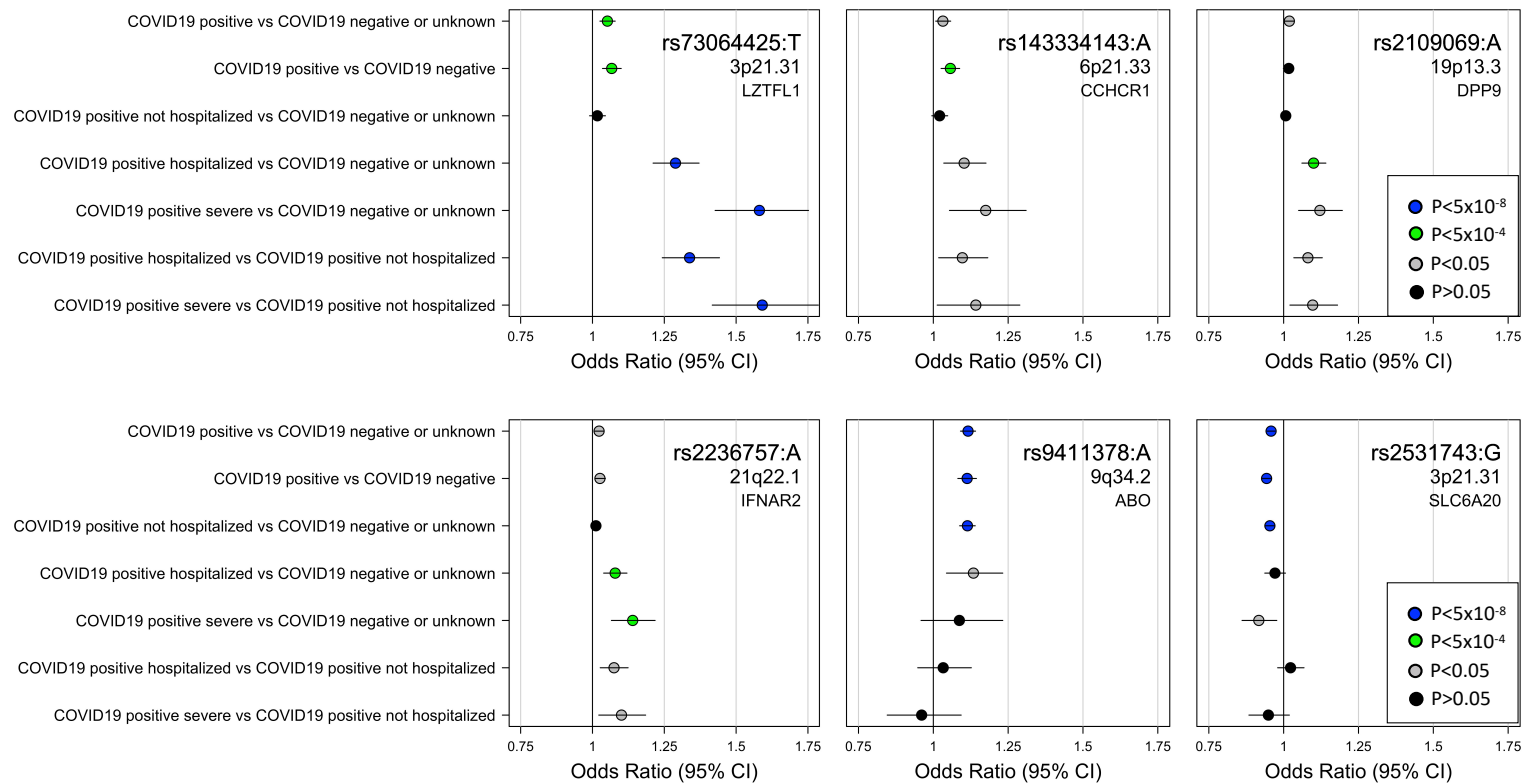

**Supplementary Figure 1.** Comparison of effect sizes across COVID-19 susceptibility and severity outcomes for six previously reported risk variants that validated in our study.

## A. AncestryDNA study

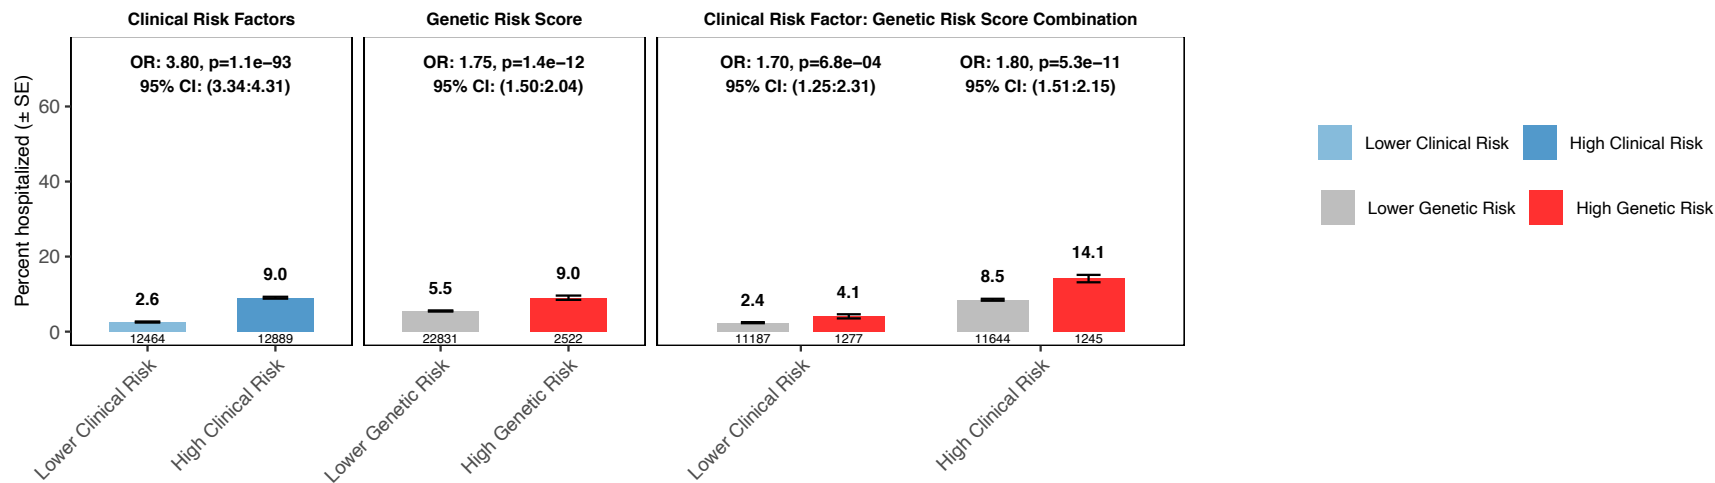

## B. UK Biobank study

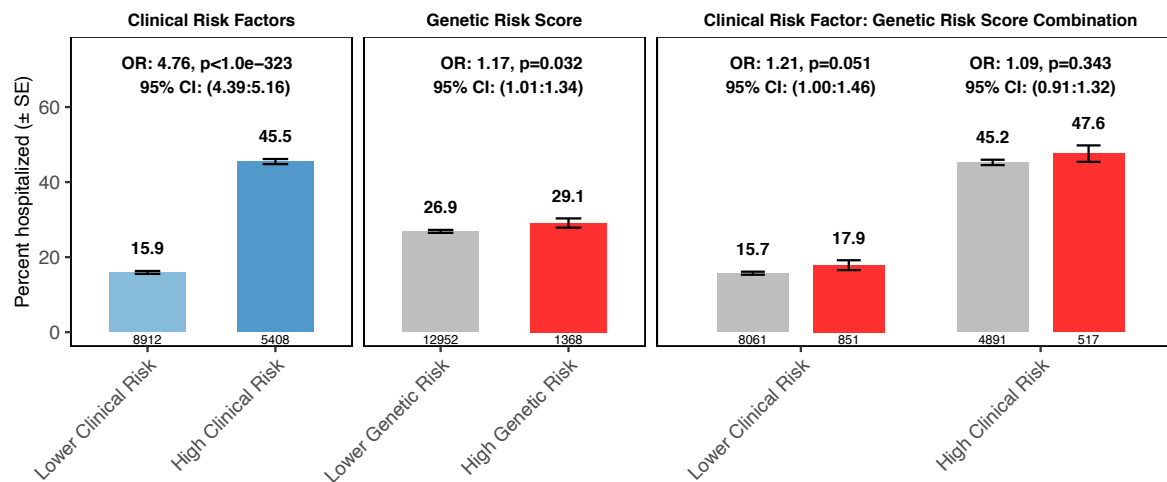

**Supplementary Figure 2.** Association between a six-SNP genetic risk score (GRS) and risk of hospitalization among COVID-19 cases of European ancestry.

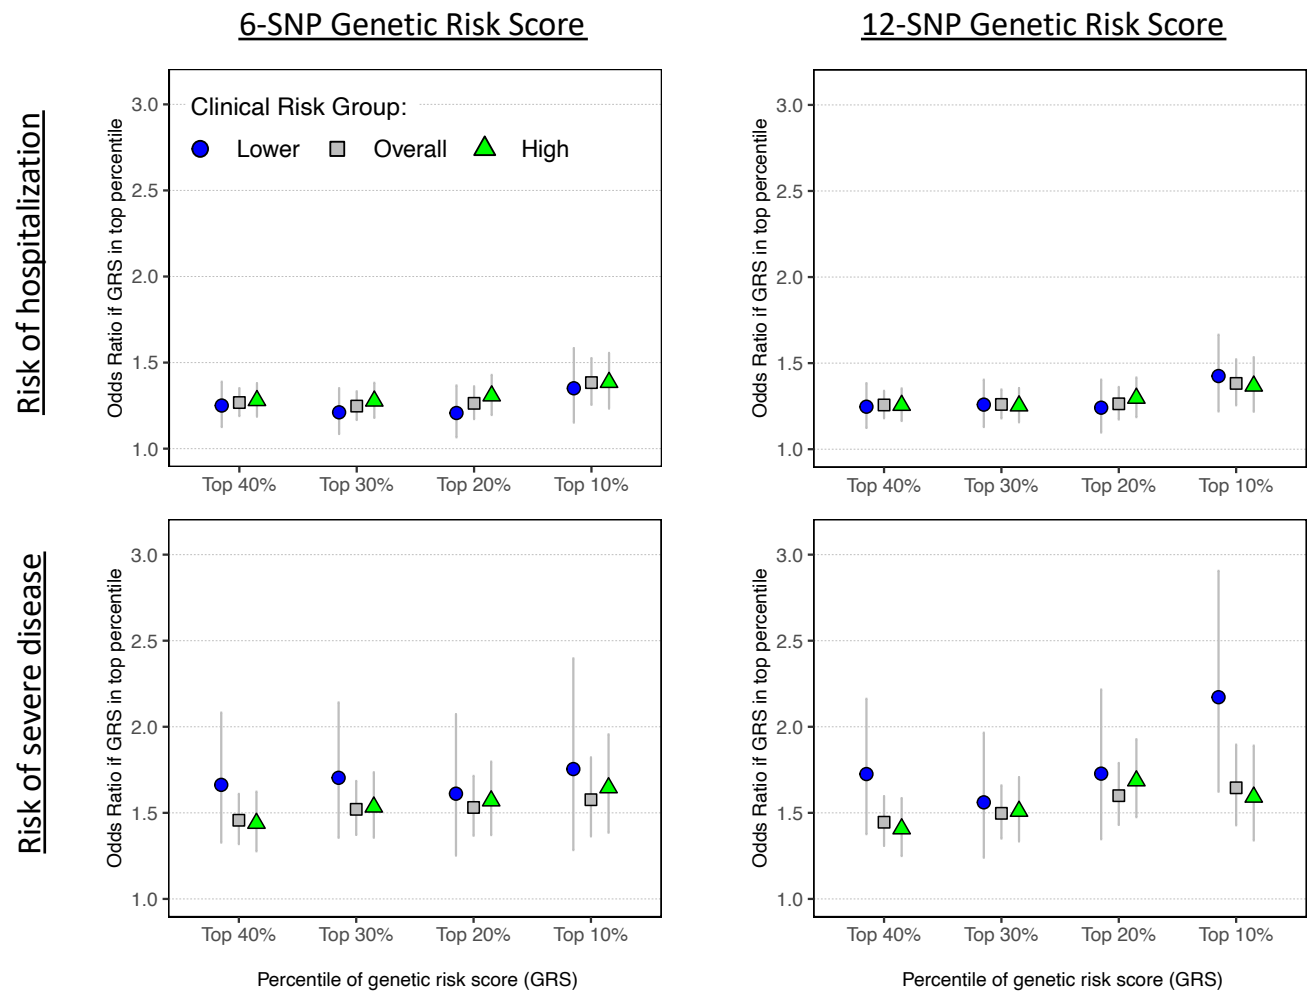

**Supplementary Figure 3.** Association between a 6-SNP and 12-SNP genetic risk score (GRS) and risk of hospitalization and severe disease among COVID-19 cases of European ancestry.

### A. Risk of hospitalization

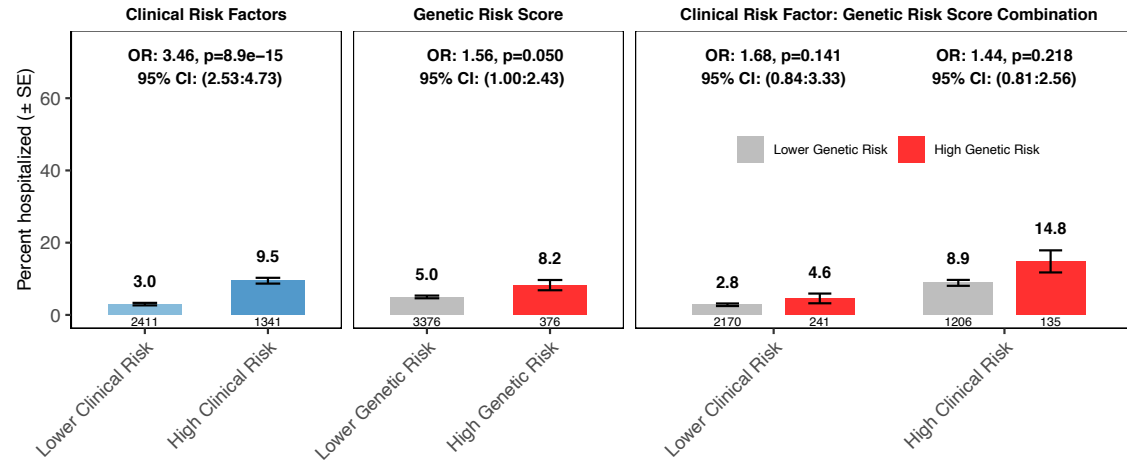

### B. Risk of severe disease

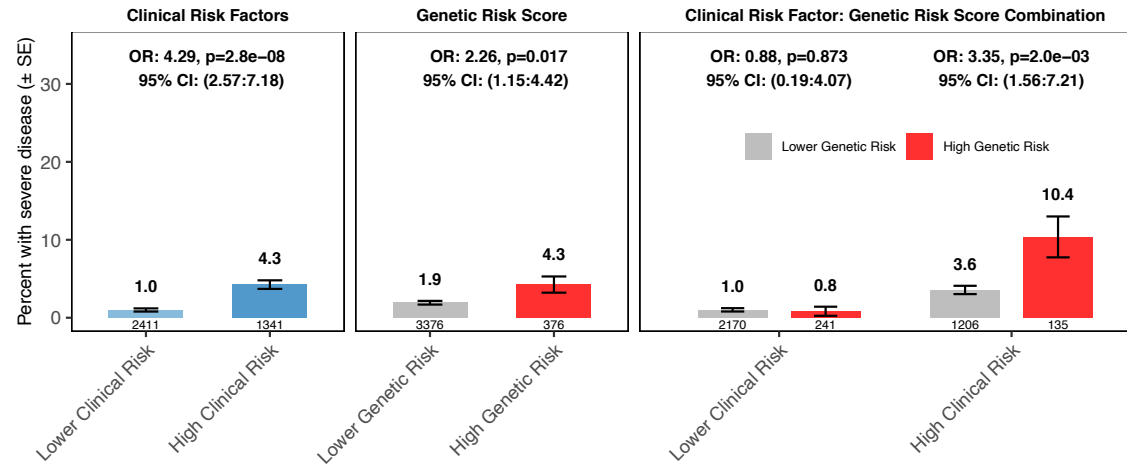

## AncestryDNA study Admixed American ancestry

**Supplementary Figure 4.** Association between a six-SNP genetic risk score (GRS) and risk of hospitalization (A) and (B) severe disease among COVID-19 cases of Admixed American ancestry.

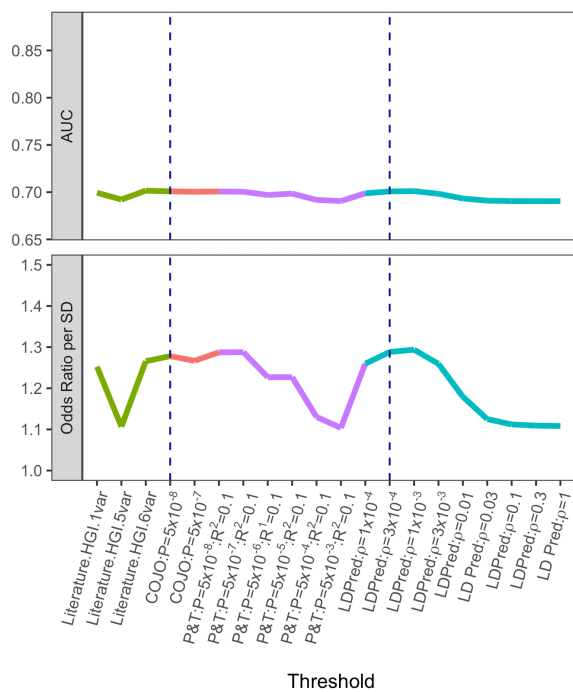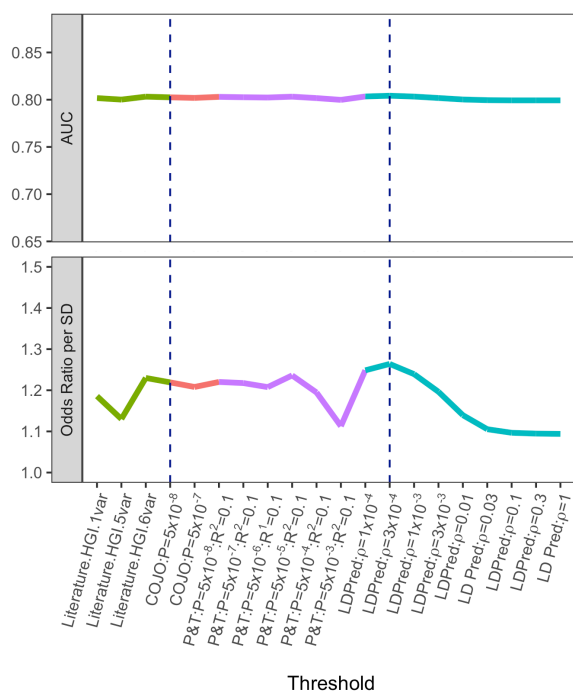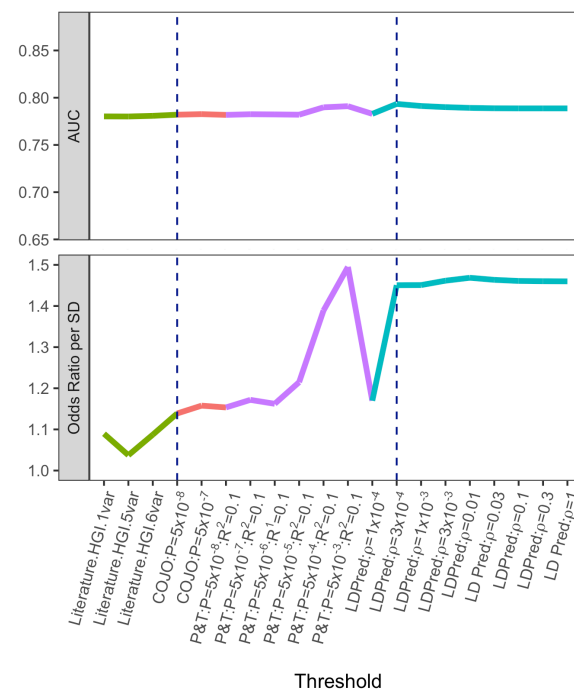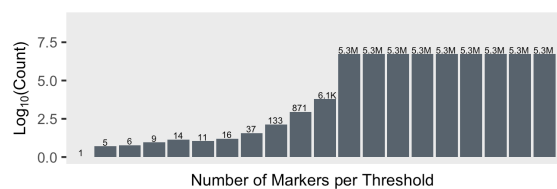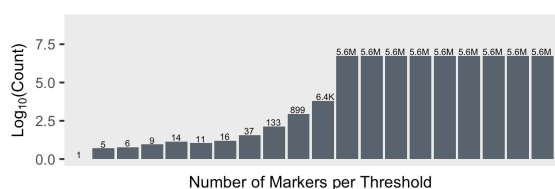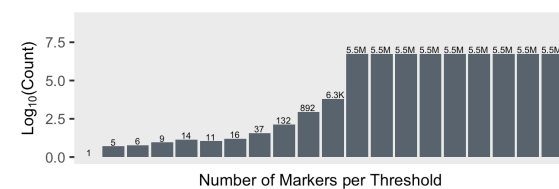

**Supplementary Figure 5. Association between risk of severe disease among COVID-19 cases of European ancestry and genetic risk scores determined based on (i) variants that were reported in the literature and validated in this study (Literature.HGI.1var: rs73064425 in LZTFL1; Literature.HGI.5var: variants from our 6-SNP model, with the exception of rs73064425 in LZTFL1; Literature.HGI.6var: all six variants from our 6-SNP model); (ii) pruning and thresholding applied to results from the risk of infection phenotype reported by the HGI, using different association P-value and LD r<sup>2</sup> thresholds; (iii) LDpred applied to risk of infection reported by the HGI, considering different  $\rho$  parameters.**

UK Biobank - European ancestry: Risk of severe disease among COVID 19+ cases, 6-SNP GRS model

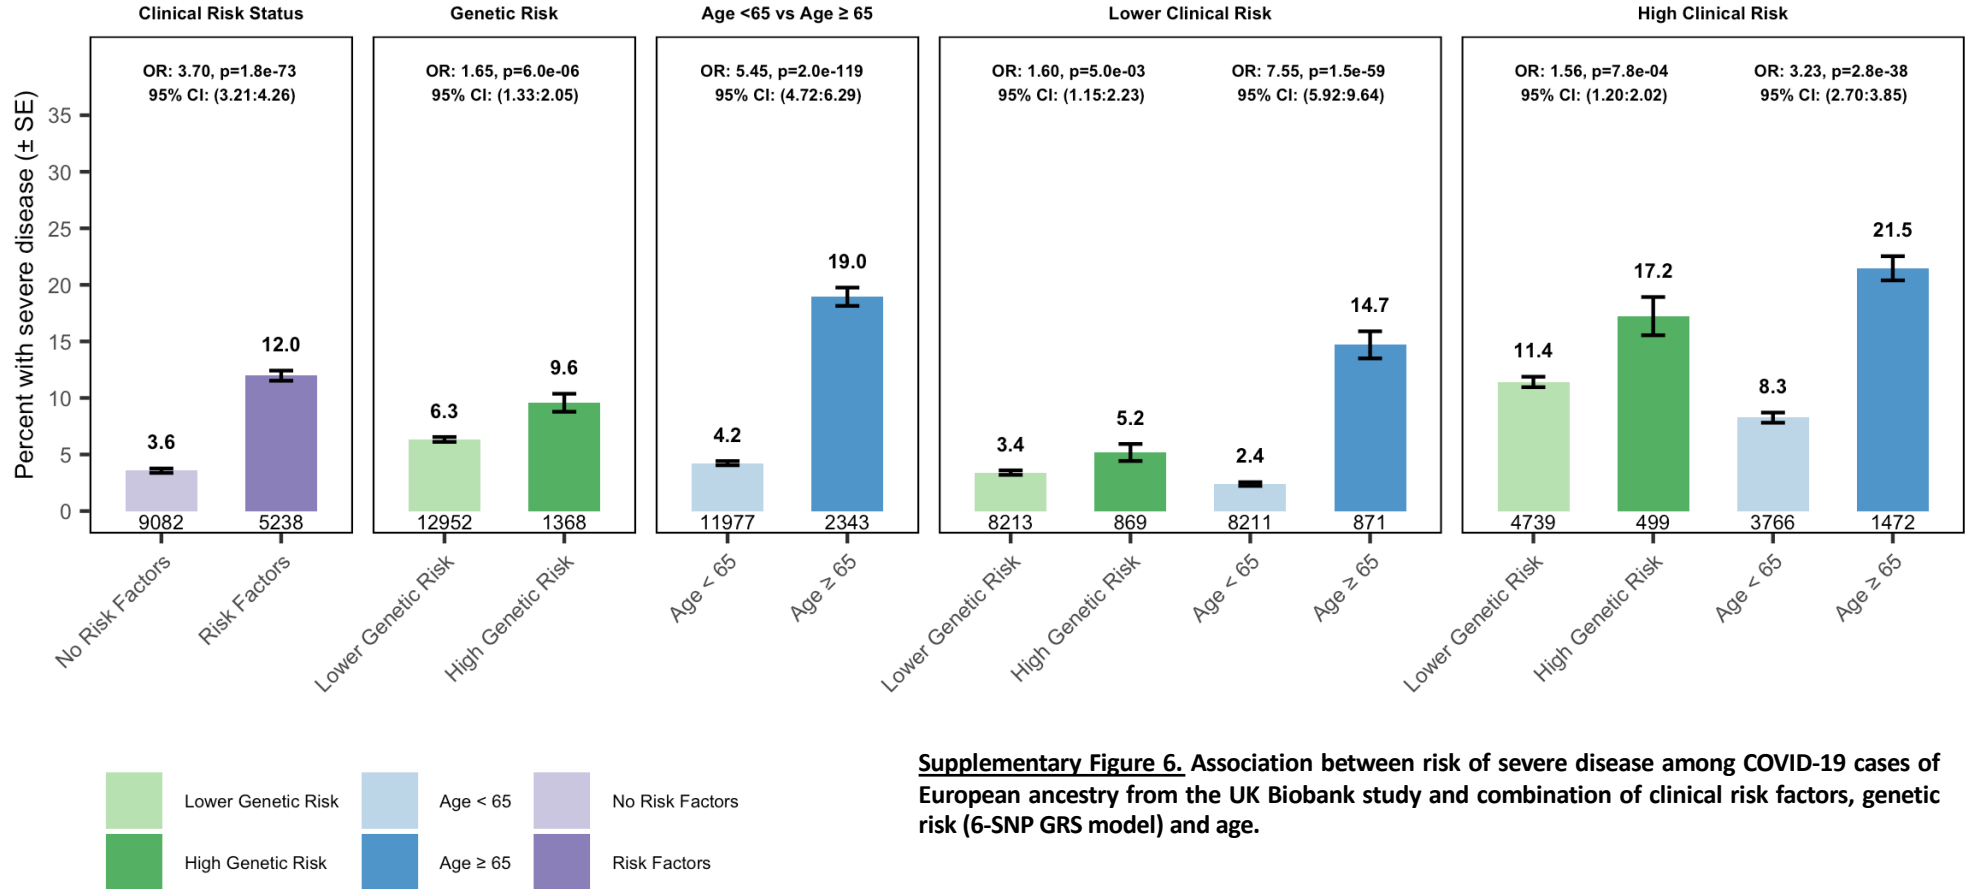

**Supplementary Figure 6.** Association between risk of severe disease among COVID-19 cases of European ancestry from the UK Biobank study and combination of clinical risk factors, genetic risk (6-SNP GRS model) and age.

SUPPLEMENTARY TABLES



**Supplementary Table 1. Breakdown of COVID-19 status across the four studies included in the analysis.**

| COVID-19 status | Positive qPCR or serology for SARS-CoV-2 | ICD10 U07 diagnosis or hospitalization | Severe COVID-19 (ventilation or death) | Negative qPCR or serology test for SARS-CoV-2 | Sample size    |               |              |             |                |
|-----------------|------------------------------------------|----------------------------------------|----------------------------------------|-----------------------------------------------|----------------|---------------|--------------|-------------|----------------|
|                 |                                          |                                        |                                        |                                               | AncestryDNA    | UK Biobank    | GHS          | PMBB        | Total          |
| Positive        | Yes                                      | Yes                                    | Yes                                    | Yes or No or NA                               | 817            | 793           | 326          | 22          | 1,958          |
|                 | Yes                                      | Yes                                    | No or NA                               | Yes or No or NA                               | 1,016          | 2810          | 471          | 122         | 4,419          |
|                 | Yes                                      | No or NA                               | Yes                                    | Yes or No or NA                               | 0              | 0             | 0            | 0           | 0              |
|                 | Yes                                      | No or NA                               | No or NA                               | Yes or No or NA                               | 29,093         | 11,613        | 4695         | 240         | 45,641         |
|                 | No or NA                                 | Yes                                    | Yes                                    | No or NA                                      | 0              | 187           | 0            | 0           | 187            |
|                 | No or NA                                 | Yes                                    | No or NA                               | No or NA                                      | 0              | 164           | 0            | 0           | 164            |
|                 | No or NA                                 | No or NA                               | Yes                                    | No or NA                                      | 0              | 0             | 0            | 0           | 0              |
|                 | No or NA                                 | Yes                                    | Yes                                    | Yes                                           | 0              | 54            | 0            | 0           | 54             |
|                 | No or NA                                 | Yes                                    | No or NA                               | Yes                                           | 0              | 202           | 0            | 5           | 207            |
|                 | No or NA                                 | No or NA                               | Yes                                    | Yes                                           | 0              | 0             | 0            | 0           | 0              |
|                 |                                          |                                        |                                        |                                               | Total = 30,926 | Total =15,823 | Total = 5492 | Total = 389 | Total = 52,630 |
| Negative        | No or NA                                 | No or NA                               | No or NA                               | Yes                                           | 36,107         | 47,205        | 23,737       | 2556        | 109,605        |
| Unknown         | NA                                       | No or NA                               | No or NA                               | NA                                            | 96,617         | 395,999       | 88,788       | 13,007      | 594,411        |
| Total           |                                          |                                        |                                        |                                               | 163,650        | 459,027       | 118,017      | 15,952      | 756,646        |

**Supplementary Table 2. Demographics and clinical characteristics of study participants.**

| Demographics                  | COVID-19 Positive |                  | Covid-19 Negative or Unknown |
|-------------------------------|-------------------|------------------|------------------------------|
|                               | Hospitalized      | Not Hospitalized |                              |
| <b>AncestryDNA</b>            |                   |                  |                              |
| Total N                       | 1818              | 29,093           | 132,724                      |
| AFR ancestry, n (%)           | 135 (7.34%)       | 1494 (5.14%)     | 5688 (4.29%)                 |
| AMR ancestry, n (%)           | 199 (10.95%)      | 3553 (12.21%)    | 13323 (10.04%)               |
| EAS ancestry, n (%)           | 0 (0%)            | 110 (0.38%)      | 570 (0.43%)                  |
| EUR ancestry, n (%)           | 1484 (81.63%)     | 23869 (81.04%)   | 113882 (85.80%)              |
| SAS ancestry, n (%)           | <100 (0%)         | <100 (0.23%)     | 261 (0.20%)                  |
| Average Age, y (% >60y)       | 57.84 (863)       | 50.1 (7940)      | 59.43 (48547)                |
| Female, n (%)                 | 726 (60.4%)       | 9870 (66.1%)     | 42909 (67.7%)                |
| Hypertension, n (%)           | 670 (36.6%)       | 5402 (18.6%)     | 28912 (21.8%)                |
| Cardiovascular Disease, n (%) | 204 (11.1%)       | 1048 (3.6%)      | 6573 (5.0%)                  |
| Type 2 Diabetes, n (%)        | 392 (21.4%)       | 2330 (8.0%)      | 12432 (9.4%)                 |
| Chronic kidney disease, n (%) | <100 (5.0%)       | 323 (1.1%)       | 2123 (1.6%)                  |
| Asthma, n (%)                 | 382 (20.8%)       | 3861 (13.3%)     | 18256 (13.8%)                |
| COPD, n (%)                   | 125 (6.8%)        | 523 (1.8%)       | 3563 (2.7%)                  |
| <b>UK Biobank</b>             |                   |                  |                              |
| Total N                       | 4188              | 11,613           | 443,204                      |
| AFR ancestry, n (%)           | 148 (3.53%)       | 472 (4.06%)      | 8804 (1.99%)                 |
| EAS ancestry, n (%)           | 0 (0%)            | 64 (0.55%)       | 2209 (0.50%)                 |
| EUR ancestry, n (%)           | 3884 (92.74%)     | 10470 (90.16%)   | 422309 (95.29%)              |
| SAS ancestry, n (%)           | 156 (3.72%)       | 607 (5.23%)      | 9882 (2.23%)                 |
| Average Age, y (% >60y)       | 61 (52.3%)        | 51 (20.2%)       | 57 (37.2%)                   |
| Female, n (%)                 | 1838 (43.9%)      | 6410 (55.2%)     | 244345 (55.1%)               |
| Hypertension, n (%)           | 1851 (44.2%)      | 2407 (20.7%)     | 102820 (23.2%)               |
| Cardiovascular Disease, n (%) | 553 (13.2%)       | 566 (4.8%)       | 25998 (5.9%)                 |
| Type 2 Diabetes, n (%)        | 757 (18.0%)       | 766 (6.6%)       | 26743 (6%)                   |
| Chronic kidney disease, n (%) | 280 (6.7%)        | 190 (1.6%)       | 8546 (1.9%)                  |
| Asthma, n (%)                 | 829 (19.8%)       | 1784 (15.4%)     | 62740 (14.1%)                |
| COPD, n (%)                   | 392 (9.3%)        | 250 (2.1%)       | 10762 (2.4%)                 |
| <b>GHS</b>                    |                   |                  |                              |
| Total N                       | 773               | 4827             | 116734                       |
| AFR ancestry, n (%)           | 0 (0%)            | 112 (2.32%)      | 3050 (2.61%)                 |

|                                      |                |                |                 |
|--------------------------------------|----------------|----------------|-----------------|
| <b>AMR ancestry, n (%)</b>           | 0 (0%)         | 80 (1.65%)     | 1307 (1.11%)    |
| <b>EUR ancestry, n (%)</b>           | 773 (100%)     | 4503 (93.28%)  | 108168 (92.66%) |
| <b>Average Age, y (% &gt;60y)</b>    | 68.68 (76.06%) | 52.20 (33.39%) | 55.41 (43.43%)  |
| <b>Female, n (%)</b>                 | 393 (50.84%)   | 3129 (66.64%)  | 70456 (62.61%)  |
| <b>Hypertension, n (%)</b>           | 603 (78.00%)   | 2191 (46.66%)  | 54881 (48.77%)  |
| <b>Cardiovascular Disease, n (%)</b> | 328 (42.43%)   | 653 (13.90%)   | 17395 (15.45%)  |
| <b>Type 2 Diabetes, n (%)</b>        | 348 (45.01%)   | 1049 (22.34%)  | 24152 (21.46%)  |
| <b>Chronic kidney disease, n (%)</b> | 298 (38.55%)   | 519 (11.05%)   | 14534 (12.91%)  |
| <b>Asthma, n (%)</b>                 | 74 (9.57%)     | 381 (8.11%)    | 7146 (6.35%)    |
| <b>COPD, n (%)</b>                   | 192 (24.83%)   | 376 (8.00%)    | 11028 (9.80%)   |
| <b>PMBB</b>                          |                |                |                 |
| <b>Total N</b>                       | 132            | 240            | 15563           |
| <b>AFR ancestry, n (%)</b>           | 132 (100%)     | 217 (90.42%)   | 8564 (55.03%)   |
| <b>EUR ancestry, n (%)</b>           | 0 (0%)         | 23 (9.58%)     | 6999 (44.97%)   |
| <b>Average Age, y (% &gt;60y)</b>    | 61.77 (58.33%) | 50.45 (27.50%) | 63.26 (61.95%)  |
| <b>Female, n (%)</b>                 | 69 (52.27%)    | 174 (72.50%)   | 8121 (52.18%)   |
| <b>Hypertension, n (%)</b>           | 113 (85.61%)   | 141 (58.75%)   | 9466 (60.82%)   |
| <b>Cardiovascular Disease, n (%)</b> | 40 (30.30%)    | 34 (14.17%)    | 4842 (31.11%)   |
| <b>Type 2 Diabetes, n (%)</b>        | 90 (68.18%)    | 70 (29.17%)    | 4546 (29.21%)   |
| <b>Chronic kidney disease, n (%)</b> | 74 (56.06%)    | 26 (10.83%)    | 3507 (22.53%)   |
| <b>Asthma, n (%)</b>                 | 29 (21.97%)    | 52 (21.67%)    | 2189 (14.07%)   |
| <b>COPD, n (%)</b>                   | 26 (19.70%)    | 15 (6.25%)     | 1706 (10.96%)   |

**Supplementary Table 3. Definitions used for the seven COVID-19 phenotypes analyzed.**

| Broad phenotype category                                      | Phenotype                                                                     | Case/control group  | Definition          |                |                | Sample size with genetic data |            |         |         |         |
|---------------------------------------------------------------|-------------------------------------------------------------------------------|---------------------|---------------------|----------------|----------------|-------------------------------|------------|---------|---------|---------|
|                                                               |                                                                               |                     | COVID-19 status     | Hospitalized   | Severe disease | AncestryDNA                   | UK Biobank | GHS     | PMBB    | Total   |
| Risk of infection                                             | COVID-19 positive vs. COVID-19 negative or unknown                            | Cases               | Positive            | Yes, No or NA  | Yes, No or NA  | 30,926                        | 15,823     | 5,492   | 389     | 52,630  |
|                                                               |                                                                               | Controls            | Negative or unknown | No or NA       | No or NA       | 132,724                       | 443,204    | 112,525 | 15,563  | 704,016 |
|                                                               | COVID-19 positive vs. COVID-19 negative                                       | Cases               | Positive            | Yes, No or NA  | Yes, No or NA  | 30,926                        | 15,823     | 5,492   | 389     | 52,630  |
|                                                               |                                                                               | Controls            | Negative            | No or NA       | No or NA       | 36,107                        | 47,205     | 23,737  | 2,556   | 109,605 |
|                                                               | COVID-19 positive and not hospitalized vs. COVID-19 negative or unknown       | Cases               | Positive            | No             | No             | 29,093                        | 11,613     | 4,695   | 240     | 45,641  |
|                                                               |                                                                               | Controls            | Negative or unknown | No or NA       | No or NA       | 132,724                       | 443,204    | 112,525 | 15,563  | 704,016 |
|                                                               | COVID-19 positive and hospitalized vs. COVID-19 negative or unknown           | Cases               | Positive            | Yes (or death) | Yes, No or NA  | 1,818                         | 4,188      | 773     | 132     | 6,911   |
|                                                               |                                                                               | Controls            | Negative or unknown | No or NA       | No or NA       | 131,893                       | 440,995    | 108,168 | 8,564   | 689,620 |
| COVID-19 positive and severe vs. COVID-19 negative or unknown | Cases                                                                         | Positive            | Yes, No or NA       | Yes            | 810            | 1,028                         | 321        | 25      | 2,184   |         |
|                                                               | Controls                                                                      | Negative or unknown | No or NA            | No or NA       | 131,893        | 440,995                       | 108,168    | 8,564   | 689,620 |         |
| Risk of adverse outcomes amongst infected individuals         | COVID-19 positive and hospitalized vs. COVID-19 positive and not hospitalized | Cases               | Positive            | Yes (or death) | Yes, No or NA  | 1,818                         | 4,188      | 773     | 132     | 6,911   |
|                                                               |                                                                               | Controls            | Positive            | No             | No             | 28,916                        | 11,549     | 4,503   | 217     | 45,185  |
|                                                               | COVID-19 positive and severe vs. COVID-19 positive and not hospitalized       | Cases               | Positive            | Yes, No or NA  | Yes            | 810                           | 1,028      | 321     | 25      | 2,184   |
|                                                               |                                                                               | Controls            | Positive            | No             | No             | 28,916                        | 11,549     | 4,503   | 217     | 45,185  |

**Supplementary Table 4. Genomic inflation factor (lambda) across the seven COVID-19 phenotypes analyzed.**

| Index | Phenotype                                                        | Study                            | N cases | N controls | Total N | Common variants (MAF>0.5%) |        | Rare variants (MAF<0.5%) |        |
|-------|------------------------------------------------------------------|----------------------------------|---------|------------|---------|----------------------------|--------|--------------------------|--------|
|       |                                                                  |                                  |         |            |         | N variants                 | Lambda | N variants               | Lambda |
| 1     | COVID19 positive vs COVID19 negative or unknown                  | Meta-analysis                    | 52630   | 704016     | 756646  | 12659604                   | 1.054  | 76347805                 | 1.011  |
|       |                                                                  | ANCESTRY Freeze Four EUR         | 25353   | 113882     | 139235  | 9114485                    | 1.032  | 17505860                 | 1.021  |
|       |                                                                  | UKB 500K EUR                     | 14354   | 422309     | 436663  | 10518951                   | 1.034  | 41557338                 | 1.038  |
|       |                                                                  | GHS Freeze 145 EUR               | 5276    | 108168     | 113444  | 10517411                   | 1.013  | 31213671                 | 1.078  |
|       |                                                                  | ANCESTRY Freeze Four AMR         | 3752    | 12323      | 16075   | 10360579                   | 1.126  | 16342242                 | 1.142  |
|       |                                                                  | ANCESTRY Freeze Four AFR         | 1629    | 5688       | 7317    | 16651249                   | 1.083  | 7924824                  | 1.111  |
|       |                                                                  | UKB 500K SAS                     | 763     | 9882       | 10645   | 11223467                   | 1.047  | 16126339                 | 1.147  |
|       |                                                                  | UKB 500K AFR                     | 620     | 8804       | 9424    | 19365480                   | 1.028  | 23403726                 | 1.126  |
|       |                                                                  | UPENN-PMBB Freeze One TOPMED AFR | 349     | 8564       | 8913    | 19201924                   | 0.993  | 24334265                 | 0.877  |
|       |                                                                  | GHS Freeze 145 AFR               | 128     | 3050       | 3178    | 19261006                   | 0.793  | 13222396                 | 0.775  |
|       |                                                                  | ANCESTRY Freeze Four EAS         | 120     | 570        | 690     | 8287783                    | 0.955  | 388659                   | 1.276  |
|       |                                                                  | GHS Freeze 145 AMR               | 88      | 1307       | 1395    | 13559291                   | 0.784  | 5975072                  | 0.804  |
|       |                                                                  | UKB 500K EAS                     | 86      | 2209       | 2295    | 9472040                    | 0.994  | 5274937                  | 0.808  |
|       |                                                                  | ANCESTRY Freeze Four SAS         | <100    | 261        | 333     | 8772668                    | 0.772  | 86                       | 0.772  |
|       |                                                                  | UPENN-PMBB Freeze One TOPMED EUR | 40      | 6999       | 7039    | 10569481                   | 0.914  | 11542106                 | 0.189  |
| 2     | COVID19 positive vs COVID19 negative                             | Meta-analysis                    | 52630   | 109605     | 162235  | 15917507                   | 1.018  | 48430743                 | 1.047  |
|       |                                                                  | ANCESTRY Freeze Four EUR         | 25353   | 30667      | 56020   | 9116923                    | 1.069  | 17300691                 | 1.065  |
|       |                                                                  | UKB 500K EUR                     | 14354   | 44903      | 59257   | 10521738                   | 1.031  | 31741985                 | 1.05   |
|       |                                                                  | GHS Freeze 145 EUR               | 5276    | 22848      | 28124   | 10518718                   | 1.021  | 26548178                 | 1.082  |
|       |                                                                  | ANCESTRY Freeze Four AMR         | 3752    | 3403       | 7155    | 10409037                   | 1.056  | 12259804                 | 1.071  |
|       |                                                                  | ANCESTRY Freeze Four AFR         | 1629    | 1783       | 3412    | 16657740                   | 1.037  | 5856801                  | 1.063  |
|       |                                                                  | UKB 500K SAS                     | 763     | 1104       | 1867    | 11217149                   | 0.986  | 4212996                  | 1.03   |
|       |                                                                  | UKB 500K AFR                     | 620     | 1029       | 1649    | 19377829                   | 0.988  | 6949159                  | 1.032  |
|       |                                                                  | UPENN-PMBB Freeze One TOPMED AFR | 349     | 1804       | 2153    | 19210279                   | 1.001  | 9238302                  | 1.159  |
|       |                                                                  | GHS Freeze 145 AFR               | 128     | 583        | 711     | 19220711                   | 0.684  | 2145450                  | 1.005  |
|       |                                                                  | ANCESTRY Freeze Four EAS         | 120     | 174        | 294     | 7368136                    | 0.816  | NA                       | NA     |
|       |                                                                  | GHS Freeze 145 AMR               | 88      | 306        | 394     | 12615699                   | 0.625  | NA                       | NA     |
|       |                                                                  | UKB 500K EAS                     | 86      | 169        | 255     | 8096105                    | 0.767  | NA                       | NA     |
|       |                                                                  | ANCESTRY Freeze Four SAS         | <100    | <100       | 152     | 7499011                    | 0.477  | NA                       | NA     |
|       |                                                                  | UPENN-PMBB Freeze One TOPMED EUR | 40      | 752        | 792     | 10649166                   | 0.902  | 1084967                  | 0.686  |
| 3     | COVID19 positive not hospitalized vs COVID19 negative or unknown | Meta-analysis                    | 45641   | 704016     | 749657  | 12664016                   | 1.049  | 76053657                 | 0.971  |
|       |                                                                  | ANCESTRY Freeze Four EUR         | 23869   | 113882     | 137751  | 9114352                    | 1.033  | 17505215                 | 1.02   |
|       |                                                                  | UKB 500K EUR                     | 10470   | 422309     | 432779  | 10518900                   | 1.027  | 41512665                 | 1.004  |
|       |                                                                  | GHS Freeze 145 EUR               | 4503    | 108168     | 112671  | 10517274                   | 1.015  | 31211655                 | 1.112  |
|       |                                                                  | ANCESTRY Freeze Four AMR         | 3553    | 12323      | 15876   | 10359235                   | 1.126  | 16286078                 | 1.142  |
|       |                                                                  | ANCESTRY Freeze Four AFR         | 1494    | 5688       | 7182    | 16650531                   | 1.080  | 7876530                  | 1.119  |
|       |                                                                  | UKB 500K SAS                     | 607     | 9882       | 10489   | 11224048                   | 1.036  | 16007835                 | 1.085  |
|       |                                                                  | UKB 500K AFR                     | 472     | 8804       | 9276    | 19365078                   | 1.037  | 23196596                 | 1.048  |
|       |                                                                  | UPENN-PMBB Freeze One TOPMED AFR | 217     | 8564       | 8781    | 19201513                   | 0.981  | 24110114                 | 0.655  |
|       |                                                                  | GHS Freeze 145 AFR               | 112     | 3050       | 3162    | 19259910                   | 0.798  | 13175822                 | 0.706  |
|       |                                                                  | ANCESTRY Freeze Four EAS         | 110     | 570        | 680     | 8277196                    | 0.937  | 370881                   | 1.238  |
|       |                                                                  | GHS Freeze 145 AMR               | 80      | 1307       | 1387    | 13555149                   | 0.805  | 5935171                  | 0.752  |
|       |                                                                  | ANCESTRY Freeze Four SAS         | <100    | 261        | 328     | 8746716                    | 0.734  | 59                       | 0.737  |
|       |                                                                  | UKB 500K EAS                     | 64      | 2209       | 2273    | 9469792                    | 1.011  | 5218675                  | 0.653  |
|       |                                                                  | UPENN-PMBB Freeze One TOPMED EUR | 23      | 6999       | 7022    | 10568880                   | 0.842  | 11520379                 | 0.103  |
|       |                                                                  | Meta-analysis                    | 6911    | 689620     | 696531  | 12311356                   | 1.019  | 72100390                 | 0.774  |
|       |                                                                  | UKB 500K EUR                     | 3884    | 422309     | 426193  | 10518717                   | 1.029  | 41438313                 | 0.869  |

|                                  |                                                                          |                                  |      |          |        |          |       |          |       |
|----------------------------------|--------------------------------------------------------------------------|----------------------------------|------|----------|--------|----------|-------|----------|-------|
| 4                                | COVID19 positive hospitalized<br>vs<br>COVID19 negative or unknown       | ANCESTRY Freeze Four EUR         | 1484 | 113882   | 115366 | 9113935  | 1.020 | 17492079 | 1.095 |
|                                  |                                                                          | GHS Freeze 145 EUR               | 773  | 108168   | 108941 | 10517626 | 0.989 | 31200896 | 0.679 |
|                                  |                                                                          | ANCESTRY Freeze Four AMR         | 199  | 12323    | 12522  | 10355552 | 0.954 | 15145563 | 0.66  |
|                                  |                                                                          | UKB 500K SAS                     | 156  | 9882     | 10038  | 11226298 | 0.956 | 15643828 | 0.594 |
|                                  |                                                                          | UKB 500K AFR                     | 148  | 8804     | 8952   | 19364991 | 0.959 | 22729568 | 0.524 |
|                                  |                                                                          | ANCESTRY Freeze Four AFR         | 135  | 5688     | 5823   | 16650183 | 0.845 | 7301363  | 0.704 |
|                                  |                                                                          | UPENN-PMBB Freeze One TOPMED AFR | 132  | 8564     | 8696   | 19203151 | 0.954 | 23970759 | 0.463 |
| 5                                | COVID19 positive severe<br>vs<br>COVID19 negative or unknown             | Meta-analysis                    | 2184 | 689620   | 691804 | 12317578 | 0.996 | 71887891 | 0.436 |
|                                  |                                                                          | UKB 500K EUR                     | 953  | 422309   | 423262 | 10518693 | 1.017 | 41399045 | 0.518 |
|                                  |                                                                          | ANCESTRY Freeze Four EUR         | 667  | 113882   | 114549 | 9113896  | 1.010 | 17491621 | 0.797 |
|                                  |                                                                          | GHS Freeze 145 EUR               | 321  | 108168   | 108489 | 10517572 | 0.944 | 31199381 | 0.337 |
|                                  |                                                                          | ANCESTRY Freeze Four AMR         | <100 | 12323    | 12404  | 10356352 | 0.929 | 15099237 | 0.371 |
|                                  |                                                                          | ANCESTRY Freeze Four AFR         | <100 | 5688     | 5750   | 16648952 | 0.925 | 7269674  | 0.481 |
|                                  |                                                                          | UKB 500K AFR                     | 43   | 8804     | 8847   | 19365845 | 0.985 | 22580462 | 0.17  |
|                                  |                                                                          | UKB 500K SAS                     | 32   | 9882     | 9914   | 11226767 | 0.918 | 15544218 | 0.168 |
| UPENN-PMBB Freeze One TOPMED AFR | 25                                                                       | 8564                             | 8589 | 19201950 | 0.910  | 23788706 | 0.093 |          |       |
| 6                                | COVID19 positive hospitalized<br>vs<br>COVID19 positive not hospitalized | Meta-analysis                    | 6911 | 45185    | 52096  | 17736142 | 0.980 | 24498210 | 1.056 |
|                                  |                                                                          | UKB 500K EUR                     | 3884 | 10470    | 14354  | 10524169 | 1.040 | 16832015 | 1.071 |
|                                  |                                                                          | ANCESTRY Freeze Four EUR         | 1484 | 23869    | 25353  | 9117639  | 1.011 | 15595929 | 1.148 |
|                                  |                                                                          | GHS Freeze 145 EUR               | 773  | 4503     | 5276   | 10521676 | 1.008 | 8477328  | 1.132 |
|                                  |                                                                          | ANCESTRY Freeze Four AMR         | 199  | 3553     | 3752   | 10392795 | 1.006 | 8906919  | 1.083 |
|                                  |                                                                          | UKB 500K SAS                     | 156  | 607      | 763    | 11125523 | 0.881 | 900209   | 1.018 |
|                                  |                                                                          | UKB 500K AFR                     | 148  | 472      | 620    | 19346132 | 0.963 | 1173739  | 1.121 |
|                                  |                                                                          | ANCESTRY Freeze Four AFR         | 135  | 1494     | 1629   | 16632746 | 0.879 | 3878224  | 1.088 |
| UPENN-PMBB Freeze One TOPMED AFR | 132                                                                      | 217                              | 349  | 17386629 | 0.878  | NA       | NA    |          |       |
| 7                                | COVID19 positive severe<br>vs<br>COVID19 positive not hospitalized       | Meta-analysis                    | 2184 | 45185    | 47369  | 17565432 | 0.977 | 22301026 | 0.981 |
|                                  |                                                                          | UKB 500K EUR                     | 953  | 10470    | 11423  | 10524284 | 1.046 | 14265668 | 1.086 |
|                                  |                                                                          | ANCESTRY Freeze Four EUR         | 667  | 23869    | 24536  | 9117378  | 1.028 | 15460239 | 0.885 |
|                                  |                                                                          | GHS Freeze 145 EUR               | 321  | 4503     | 4824   | 10521257 | 0.902 | 7888063  | 0.971 |
|                                  |                                                                          | ANCESTRY Freeze Four AMR         | <100 | 3553     | 3634   | 10395661 | 0.993 | 8745342  | 0.685 |
|                                  |                                                                          | ANCESTRY Freeze Four AFR         | <100 | 1494     | 1556   | 16630281 | 0.978 | 3750324  | 0.792 |
|                                  |                                                                          | UKB 500K AFR                     | 43   | 472      | 515    | 19296565 | 0.892 | 266926   | 0.693 |
|                                  |                                                                          | UKB 500K SAS                     | 32   | 607      | 639    | 11034836 | 0.814 | 467149   | 0.548 |
| UPENN-PMBB Freeze One TOPMED AFR | 25                                                                       | 217                              | 242  | 15603727 | 0.998  | NA       | NA    |          |       |

**Supplementary Table 5. Eight variants associated with COVID-19 susceptibility in previous GWAS.**

| Locus index | Independent signal index | Reference (PMID)         | First author     | Phenotype                             | rs ID       | hg38             | Nearest gene   | Effect allele | Locus    | Odds Ratio | LCI  | UCI  | P-value  | N cases | N controls | Top independent association in locus |
|-------------|--------------------------|--------------------------|------------------|---------------------------------------|-------------|------------------|----------------|---------------|----------|------------|------|------|----------|---------|------------|--------------------------------------|
| 1           | 1                        | <a href="#">33307546</a> | Pairo-Castineira | covid19 severe vs negative or unknown | rs73064425  | 3:45859597:C:T   | <i>LZTFL1</i>  | T             | 3p21.31  | 2.14       | 1.88 | 2.45 | 4.77E-30 | 1676    | 8380       | 1                                    |
| 1           | 2                        | 33888907                 | Shelton          | covid test positive vs negative       | rs2531743   | 3:45796808:G:A   | <i>SLC6A20</i> | G             | 3p21.31  | 0.917      | 0.89 | 0.94 | 7.60E-10 | 12972   | 101268     | 1                                    |
| 2           | 1                        | <a href="#">33307546</a> | Pairo-Castineira | covid19 severe vs negative or unknown | rs143334143 | 6:31153649:G:A   | <i>CCHCR1</i>  | A             | 6p21.33  | 1.85       | 1.61 | 2.13 | 8.82E-18 | 1676    | 8380       | 1                                    |
| 3           | 1                        | 33888907                 | Shelton          | covid test positive vs negative       | rs9411378   | 9:133270015:A:C  | <i>ABO</i>     | A             | 9q34.2   | 1.17       | 1.12 | 1.20 | 5.30E-20 | 12972   | 101268     | 1                                    |
| 4           | 1                        | <a href="#">33307546</a> | Pairo-Castineira | covid19 severe vs negative or unknown | rs10735079  | 12:112942203:G:A | <i>OAS3</i>    | A             | 12q24.13 | 1.29       | 1.18 | 1.42 | 1.65E-08 | 1676    | 8380       | 1                                    |
| 5           | 1                        | <a href="#">33307546</a> | Pairo-Castineira | covid19 severe vs negative or unknown | rs2109069   | 19:4719431:G:A   | <i>DPP9</i>    | A             | 19p13.3  | 1.36       | 1.25 | 1.48 | 3.98E-12 | 1676    | 8380       | 1                                    |
| 6           | 1                        | <a href="#">33307546</a> | Pairo-Castineira | covid19 severe vs negative or unknown | rs74956615  | 19:10317045:T:A  | <i>RAVER1</i>  | A             | 19p13.2  | 1.59       | 1.35 | 1.87 | 2.31E-08 | 1676    | 8380       | 1                                    |
| 7           | 1                        | <a href="#">33307546</a> | Pairo-Castineira | covid19 severe vs negative or unknown | rs2236757   | 21:33252612:A:G  | <i>IFNAR2</i>  | A             | 21q22.1  | 1.28       | 1.17 | 1.41 | 5.00E-08 | 1676    | 8380       | 1                                    |

**Supplementary Table 6. Sample overlap between our study and those queried to identify variants associated with COVID-19 susceptibility in previous GWAS.**

| First author                                                                                                                                                                                 | Reference (PMID)         | N cases | N controls  | Sample overlap with our study                                                                                                  |
|----------------------------------------------------------------------------------------------------------------------------------------------------------------------------------------------|--------------------------|---------|-------------|--------------------------------------------------------------------------------------------------------------------------------|
| <b><i>Three studies with minimal or no sample overlap with our study</i></b>                                                                                                                 |                          |         |             |                                                                                                                                |
| <i>(eight variants selected for replication with five susceptibility phenotypes: in/near LZTFL1, SLC6A20, MHC, ABO, OAS3, DPP9, RAVR1 and IFNAR2)</i>                                        |                          |         |             |                                                                                                                                |
| Ellinghaus                                                                                                                                                                                   | 32558485                 | 1,610   | 2,205       | No known overlap                                                                                                               |
| Pairo-Castineira                                                                                                                                                                             | <a href="#">33307546</a> | 1,676   | 8,380       | ~1% of samples from our analysis of UKB were included as controls in this study                                                |
| Shelton                                                                                                                                                                                      | 33888907                 | 15,434  | 1,035,598   | No known overlap                                                                                                               |
| <b><i>One study with substantial sample overlap with our study</i></b>                                                                                                                       |                          |         |             |                                                                                                                                |
| <i>(Four variants associated with reported infection [phenotype "C2"] selected for look-up in our independent analysis of severity among cases: in/near RPL24, DNAH5, FOXP4 and PLEKHA4)</i> |                          |         |             |                                                                                                                                |
| HGI (freeze 5)                                                                                                                                                                               | NA                       | 49,562  | 1.7 million | ~100% of samples from UKB, GHS and UPENN, and ~60% from AncestryDNA contributed to HGI, but using an earlier phenotype freeze. |



**Supplementary Table 7. Comparison of effect sizes between ancestries for the novel ACE2 risk variant.**

| Locus, nearest gene | rs ID       | hg38            | Effect allele | Phenotype                                             | Ancestry | Odds Ratio (95% CI) | P-value  | N cases with 0 1 2 copies of the effect allele | N controls with 0 1 2 copies of the effect allele | Effect allele frequency | Cross-ancestry heterogeneity test P-value |
|---------------------|-------------|-----------------|---------------|-------------------------------------------------------|----------|---------------------|----------|------------------------------------------------|---------------------------------------------------|-------------------------|-------------------------------------------|
| Xp22.2<br>ACE2      | rs190509934 | 23:15602217:T:C | C             | COVID19 positive vs<br>COVID19 negative or<br>unknown | AFR      | 0.578[0.373,0.894]  | 0.014    | 2713 12 1                                      | 25905 146 55                                      | 0.005                   | 0.676                                     |
|                     |             |                 |               |                                                       | AMR      | 0.792[0.431,1.456]  | 0.45     | 3830 10 0                                      | 13577 44 9                                        | 0.002                   |                                           |
|                     |             |                 |               |                                                       | EUR      | 0.606[0.516,0.711]  | 8.80E-10 | 44930 87 6                                     | 648877 1835 646                                   | 0.002                   |                                           |
|                     |             |                 |               |                                                       | SAS      | 0.500[0.323,0.773]  | 0.0018   | 821 13 1                                       | 9815 226 102                                      | 0.020                   |                                           |

**Supplementary Table 8. Association results in the UK Biobank study between six established clinical risk factors for COVID-19 and (i) the novel risk variant in ACE2; (ii) the six published risk variants for COVID-19 that validated in this study; and (iii) the two novel risk variants identified in the HGI analysis of C2 and that we found to also associate with disease severity.**

| Nearest gene                                                         | Variant         | Effect allele | Disease                 | Odds Ratio         | P-value  | Effect allele frequency | N cases | N controls |
|----------------------------------------------------------------------|-----------------|---------------|-------------------------|--------------------|----------|-------------------------|---------|------------|
| <i>(i) Novel risk variant in ACE2</i>                                |                 |               |                         |                    |          |                         |         |            |
| <i>ACE2</i>                                                          | 23:15602217:T:C | C             | Coronary artery disease | 0.917[0.798,1.054] | 0.2245   | 0.0027                  | 28605   | 254598     |
|                                                                      |                 |               | Kidney disease          | 0.927[0.808,1.064] | 0.2800   | 0.0030                  | 35472   | 211418     |
|                                                                      |                 |               | Hypertension            | 0.899[0.821,0.984] | 0.0210   | 0.0030                  | 105117  | 269090     |
|                                                                      |                 |               | COPD                    | 0.904[0.739,1.105] | 0.3200   | 0.0030                  | 12839   | 372779     |
|                                                                      |                 |               | Asthma                  | 1.016[0.896,1.151] | 0.8100   | 0.0030                  | 39372   | 343873     |
|                                                                      |                 |               | Type-2 diabetes         | 0.957[0.831,1.103] | 0.5500   | 0.0030                  | 25722   | 433026     |
| <i>(ii) Six published risk variants that validated in this study</i> |                 |               |                         |                    |          |                         |         |            |
| <i>SLC6A20</i>                                                       | 3:45796808:G:A  | G             | Coronary artery disease | 0.997[0.981,1.014] | 0.7500   | 0.4070                  | 38269   | 416904     |
|                                                                      |                 |               | Kidney disease          | 1.000[0.983,1.018] | 0.9700   | 0.4160                  | 35472   | 211418     |
|                                                                      |                 |               | Hypertension            | 0.995[0.984,1.007] | 0.4100   | 0.4160                  | 105117  | 269090     |
|                                                                      |                 |               | COPD                    | 1.011[0.984,1.038] | 0.4300   | 0.4160                  | 12839   | 372779     |
|                                                                      |                 |               | Asthma                  | 0.993[0.978,1.009] | 0.3800   | 0.4160                  | 39372   | 343873     |
|                                                                      |                 |               | Type-2 diabetes         | 0.999[0.980,1.018] | 0.9000   | 0.4160                  | 25722   | 433026     |
| <i>LZTFL1</i>                                                        | 3:45859597:C:T  | T             | Coronary artery disease | 0.986[0.957,1.017] | 0.3700   | 0.0700                  | 38269   | 416904     |
|                                                                      |                 |               | Kidney disease          | 1.018[0.985,1.052] | 0.2900   | 0.0690                  | 35472   | 211418     |
|                                                                      |                 |               | Hypertension            | 1.003[0.982,1.025] | 0.7700   | 0.0690                  | 105117  | 269090     |
|                                                                      |                 |               | COPD                    | 1.053[1.002,1.107] | 0.0410   | 0.0690                  | 12839   | 372779     |
|                                                                      |                 |               | Asthma                  | 1.026[0.996,1.056] | 0.0940   | 0.0690                  | 39372   | 343873     |
|                                                                      |                 |               | Type-2 diabetes         | 1.002[0.966,1.039] | 0.9200   | 0.0690                  | 25722   | 433026     |
| <i>CCHCR1</i>                                                        | 6:31153649:G:A  | A             | Coronary artery disease | 1.048[1.016,1.081] | 0.0030   | 0.0650                  | 38269   | 416904     |
|                                                                      |                 |               | Kidney disease          | 1.016[0.982,1.051] | 0.3500   | 0.0650                  | 35472   | 211418     |
|                                                                      |                 |               | Hypertension            | 0.989[0.968,1.011] | 0.3400   | 0.0650                  | 105117  | 269090     |
|                                                                      |                 |               | COPD                    | 0.999[0.949,1.052] | 0.9800   | 0.0650                  | 12839   | 372779     |
|                                                                      |                 |               | Asthma                  | 0.913[0.885,0.941] | 6.80E-09 | 0.0650                  | 39372   | 343873     |
|                                                                      |                 |               | Type-2 diabetes         | 1.083[1.045,1.123] | 1.50E-05 | 0.0660                  | 25722   | 433026     |
| <i>ABO</i>                                                           | 9:133271182:T:C | T             | Coronary artery disease | 1.022[1.004,1.040] | 0.0180   | 0.2550                  | 38269   | 416904     |
|                                                                      |                 |               | Kidney disease          | 0.963[0.945,0.982] | 0.0001   | 0.2590                  | 35472   | 211418     |
|                                                                      |                 |               | Hypertension            | 0.990[0.978,1.003] | 0.1400   | 0.2570                  | 105117  | 269090     |
|                                                                      |                 |               | COPD                    | 1.009[0.980,1.039] | 0.5500   | 0.2570                  | 12839   | 372779     |
|                                                                      |                 |               | Asthma                  | 1.012[0.995,1.030] | 0.1800   | 0.2570                  | 39372   | 343873     |
|                                                                      |                 |               | Type-2 diabetes         | 1.042[1.021,1.064] | 0.0001   | 0.2570                  | 25722   | 433026     |
|                                                                      |                 |               | Coronary artery disease | 1.009[0.992,1.025] | 0.3100   | 0.3230                  | 38269   | 416904     |
|                                                                      |                 |               | Kidney disease          | 0.982[0.964,1.000] | 0.0460   | 0.3200                  | 35472   | 211418     |

|                                                                                                                                            |                 |   |                         |                    |        |        |        |        |
|--------------------------------------------------------------------------------------------------------------------------------------------|-----------------|---|-------------------------|--------------------|--------|--------|--------|--------|
| <i>DPP9</i>                                                                                                                                | 19:4719431:G:A  | A | Hypertension            | 0.998[0.987,1.010] | 0.7700 | 0.3200 | 105117 | 269090 |
|                                                                                                                                            |                 |   | COPD                    | 0.992[0.965,1.019] | 0.5600 | 0.3200 | 12839  | 372779 |
|                                                                                                                                            |                 |   | Asthma                  | 1.000[0.984,1.016] | 0.9900 | 0.3200 | 39372  | 343873 |
|                                                                                                                                            |                 |   | Type-2 diabetes         | 1.004[0.984,1.024] | 0.7200 | 0.3200 | 25722  | 433026 |
| <i>IFNAR2</i>                                                                                                                              | 21:33252612:A:G | A | Coronary artery disease | 1.012[0.994,1.029] | 0.1900 | 0.2810 | 38269  | 416904 |
|                                                                                                                                            |                 |   | Kidney disease          | 1.006[0.987,1.025] | 0.5400 | 0.2860 | 35472  | 211418 |
|                                                                                                                                            |                 |   | Hypertension            | 1.008[0.996,1.021] | 0.1800 | 0.2870 | 105117 | 269090 |
|                                                                                                                                            |                 |   | COPD                    | 0.992[0.965,1.021] | 0.6000 | 0.2870 | 12839  | 372779 |
|                                                                                                                                            |                 |   | Asthma                  | 1.011[0.995,1.028] | 0.1900 | 0.2870 | 39372  | 343873 |
|                                                                                                                                            |                 |   | Type-2 diabetes         | 1.013[0.992,1.033] | 0.2300 | 0.2870 | 25722  | 433026 |
| <b><i>(iii) Two novel risk variants identified in the HGI analysis of C2 and that we found to also associate with disease severity</i></b> |                 |   |                         |                    |        |        |        |        |
| <i>RPL24</i>                                                                                                                               | 3:101705614:T:C | C | Coronary artery disease | 1.006[0.990,1.022] | 0.4900 | 0.3550 | 38269  | 416904 |
|                                                                                                                                            |                 |   | Kidney disease          | 1.004[0.987,1.022] | 0.6300 | 0.3550 | 35472  | 211418 |
|                                                                                                                                            |                 |   | Hypertension            | 1.012[1.001,1.024] | 0.0400 | 0.3540 | 105117 | 269090 |
|                                                                                                                                            |                 |   | COPD                    | 1.004[0.978,1.031] | 0.7400 | 0.3550 | 12839  | 372779 |
|                                                                                                                                            |                 |   | Asthma                  | 0.980[0.965,0.996] | 0.0120 | 0.3550 | 39372  | 343873 |
|                                                                                                                                            |                 |   | Type-2 diabetes         | 0.991[0.973,1.010] | 0.3700 | 0.3550 | 25722  | 433026 |
| <i>FOXP4</i>                                                                                                                               | 6:41534945:A:C  | C | Coronary artery disease | 0.977[0.924,1.033] | 0.4100 | 0.0210 | 38269  | 416904 |
|                                                                                                                                            |                 |   | Kidney disease          | 0.989[0.933,1.050] | 0.7300 | 0.0210 | 35472  | 211418 |
|                                                                                                                                            |                 |   | Hypertension            | 0.996[0.958,1.035] | 0.8200 | 0.0210 | 105117 | 269090 |
|                                                                                                                                            |                 |   | COPD                    | 0.982[0.897,1.076] | 0.7000 | 0.0210 | 12839  | 372779 |
|                                                                                                                                            |                 |   | Asthma                  | 0.976[0.926,1.030] | 0.3800 | 0.0210 | 39372  | 343873 |
|                                                                                                                                            |                 |   | Type-2 diabetes         | 1.009[0.946,1.077] | 0.7800 | 0.0210 | 25722  | 433026 |

**Supplementary Table 9. Association between two severity phenotypes and a novel risk variant for COVID-19 near ACE2 identified in this study.**

| Locus, nearest gene | rs ID       | hg38            | Phenotype                                                          | Effect allele | Odds Ratio* [95% CI] | P-value  | N cases with 0 1 2 copies of the effect allele | N controls with 0 1 2 copies of the effect allele | Effect allele frequency | N cases | N controls | Cross-study heterogeneity test P-value |
|---------------------|-------------|-----------------|--------------------------------------------------------------------|---------------|----------------------|----------|------------------------------------------------|---------------------------------------------------|-------------------------|---------|------------|----------------------------------------|
| Xp22.2<br>ACE2      | rs190509934 | 23:15602217:T:C | COVID19 positive hospitalized vs COVID19 positive not hospitalized | C             | 0.694[0.419,1.150]   | 1.57E-01 | 6766 13 0                                      | 44854 106 8                                       | 0.001                   | 6779    | 44968      | 0.222                                  |
|                     |             |                 | COVID19 positive severe vs COVID19 positive not hospitalized       | C             | 0.544[0.210,1.408]   | 2.10E-01 | 2157 2 0                                       | 44854 106 8                                       | 0.001                   | 2159    | 44968      | 0.916                                  |

\* Estimated based on trans-ancestry inverse-variance meta-analysis across UKB, AncestryDNA, GHS and UPENN-PMBB.

**Supplementary Table 10. Published gene expression datasets used to identify sentinel expression quantitative trait loci (eQTL) that co-localized (LD  $r^2 > 0.8$ ) with sentinel GWAS variants.**

| First author   | PMID     | Tissue/cell type            | Sample size |
|----------------|----------|-----------------------------|-------------|
| Alasoo         | 29379200 | MACROPHAGES-IFNg            | 86          |
|                |          | MACROPHAGES-IFNg-salmonella | 86          |
|                |          | MACROPHAGES-naive           | 86          |
|                |          | MACROPHAGES-salmonella      | 86          |
| Andiappan      | 26259071 | NEUTROPHILS                 | 114         |
| Barreiro       | 22233810 | DENDRITIC-NotInfected       | 65          |
|                |          | DENDRITIC-TBInfected        | 65          |
| Battle         | 24092820 | WHOLE-BLOOD                 | 922         |
|                |          | WHOLE-BLOOD-ase             | 922         |
|                |          | WHOLE-BLOOD-splice          | 922         |
| Brown          | 29058714 | LCLS                        | 506         |
|                |          | SKIN                        | 471         |
|                |          | WHOLE-BLOOD                 | 242         |
| Brumpton       | 27155841 | LCLS                        | 356         |
| Caliskan       | 25874939 | PBMCS-baseline              | 98          |
|                |          | PBMCS-rhinovirus            | 98          |
|                |          | PBMCS-rhinovirus-rcQTL      | 98          |
| Chen           | 27863251 | CD4TCELLS                   | Up to 197   |
|                |          | MONOCYTES                   | Up to 197   |
|                |          | NEUTROPHILS                 | Up to 197   |
| Chiang         | 28369037 | LUNG                        | Up to 147   |
|                |          | SKIN                        | Up to 147   |
|                |          | WHOLEBLOOD                  | Up to 147   |
| Davenport 2016 | 26917434 | LEUCOCYTES                  | 265         |
| Davenport 2018 | 30340504 | WHOLEBLOOD                  | 157         |
|                |          | WHOLEBLOOD-IFN-interaction  | 157         |
| Dimas          | 19644074 | LCLS                        | 75          |
|                |          | TCELLS                      | 75          |
| Di Narzo       | 27336838 | WHOLE-BLOOD                 | 149         |
| Ding           | 21129726 | LESIONAL-SKIN               | 57          |
|                |          | NORMAL-SKIN                 | 53          |
|                |          | UNINVOLVED-SKIN             | 53          |
| Dixon          | 17873877 | LCLS                        | 400         |
| Fairfax 2012   | 22446964 | BCELLS                      | 283         |
|                |          | MONOCYTES                   | 283         |
| Fairfax 2014   | 24604202 | MONOCYTES-IFN               | 367         |
|                |          | MONOCYTES-LPS2              | 261         |
|                |          | MONOCYTES-LPS24             | 322         |
|                |          | MONOCYTES-NAIVE             | 414         |
| Fehrmann       | 21829388 | WHOLE-BLOOD                 | 1469        |
| Ferraro        | 24610777 | Tconv                       | 65          |
|                |          | Tregs                       | 65          |
| Franco         | 23878721 | WHOLE-BLOOD-Influenza       | 247         |
| Lappalainen    | 24037378 | LCLS                        | 373         |
| Grundberg      | 22941192 | LCLS                        | 856         |
|                |          | SKIN                        | 856         |
| GTEX v8        | 32912332 | 49 individual tissues       | 73-706      |
| Hao            | 23209423 | LUNG                        | 1111        |
| Huang          | 25951796 | LCLs                        | 368         |
|                |          | PBMCS                       | 240         |
|                |          | SKIN                        | 110         |
| Jansen         | 28165122 | WHOLE-BLOOD                 | 4896        |
| Joahnes        | 28122634 | WHOLE-BLOOD                 | 5257        |
| Kasela         | 28248954 | CD4TCELLS                   | 293         |
|                |          | CD8TCELLS                   | 293         |
| KimHellmuth    | 28814792 | MONOCYTES-LPS6H             | 134         |
|                |          | MONOCYTES-LPS90             | 134         |
|                |          | MONOCYTES-MDP6H             | 134         |
|                |          | MONOCYTES-MDP90             | 134         |
|                |          | MONOCYTES-RNA6H             | 134         |

|                              |          |                               |         |
|------------------------------|----------|-------------------------------|---------|
| Kim                          | 25327457 | MONOCYTES-Baseline            | 137     |
|                              |          | MONOCYTES-Differential        | 137     |
|                              |          | MONOCYTES-LPS                 | 137     |
| Kukurba                      | 27197214 | WHOLE-BLOOD                   | 922     |
| Lee                          | 24604203 | DENDRITIC-Baseline            | 528     |
|                              |          | DENDRITIC-Flu                 | 342     |
|                              |          | DENDRITIC-Flu-delta           | 342     |
|                              |          | DENDRITIC-IFNb                | 284     |
|                              |          | DENDRITIC-IFNb-delta          | 284     |
|                              |          | DENDRITIC-LPS                 | 356     |
|                              |          | DENDRITIC-LPS-delta           | 356     |
| LloydJones                   | 28065468 | WHOLE-BLOOD                   | 2765    |
| Luo                          | 26102239 | SMALL-AIRWAYS                 | 105     |
| Momozawa                     | 29930244 | BCELLS                        | 323     |
|                              |          | CD4TCELLS                     | 323     |
|                              |          | CD8TCELLS                     | 323     |
|                              |          | GRANULOCYTES                  | 323     |
|                              |          | MONOCYTES                     | 323     |
| Murphy                       | 20833654 | CD4-TCELLS                    | 200     |
| Naranbhai                    | 26151758 | NEUTROPHILS                   | 101     |
| Nedelec                      | 27768889 | MACROPHAGES-baseline          | 95      |
|                              |          | MACROPHAGES-baseline-asQTL    | 95      |
|                              |          | MACROPHAGES-listeria          | 95      |
|                              |          | MACROPHAGES-listeria-asQTL    | 95      |
|                              |          | MACROPHAGES-listeria-reQTL    | 95      |
|                              |          | MACROPHAGES-salmonella        | 95      |
|                              |          | MACROPHAGES-salmonella-asQTL  | 95      |
| MACROPHAGES-salmonella-reQTL | 95       |                               |         |
| Pala                         | 28394350 | LEUCOCYTES                    | 624     |
| Peters                       | 27015630 | BCELLS                        | 80      |
|                              |          | CD4-TCELLS                    | 121     |
|                              |          | CD8-TCELLS                    | 108     |
|                              |          | MONOCYTES                     | 124     |
|                              |          | NEUTROPHILS                   | 121     |
| Qiu 2011                     | 21949713 | SPUTUM                        | 131     |
| Qiu 2014                     | 24770851 | LCLS-steroids                 | 117     |
| Quach                        | 27768888 | MONOCYTES-baseline            | 100     |
|                              |          | MONOCYTES-IAV                 | 100     |
|                              |          | MONOCYTES-LPS                 | 100     |
|                              |          | MONOCYTES-Pam3CSK4            | 100     |
|                              |          | MONOCYTES-R848                | 100     |
| Raj                          | 24786080 | CD4-TCELLS                    | 407     |
|                              |          | MONOCYTES                     | 401     |
| vanderWijst                  | 29610479 | BCELLS                        | 45      |
|                              |          | CD4TCELLS                     | 45      |
|                              |          | CD8TCELLS                     | 45      |
|                              |          | DENDRITIC                     | 45      |
|                              |          | MONOCYTES                     | 45      |
|                              |          | MONOCYTES-classical           | 45      |
|                              |          | MONOCYTES-nonclassical        | 45      |
|                              |          | NKCELLS                       | 45      |
|                              |          | PBMCS                         | 45      |
|                              |          | Vosa                          | BioRxiv |
| Walsh                        | 27140173 | WHOLE-BLOOD                   | 377     |
| Westra                       | 24013639 | WHOLE-BLOOD                   | 5311    |
| Yao                          | 28285768 | WHOLEBLOOD                    | 5257    |
| Ye                           | 25214635 | CD4-TCELLS-48h328             | 348     |
|                              |          | CD4-TCELLS-48hTh17            | 348     |
|                              |          | CD4-TCELLS-4h328              | 348     |
|                              |          | CD4-TCELLS-4hIFNb             | 348     |
|                              |          | CD4-TCELLS-UNST               | 348     |
| Zeller                       | 20502693 | MONOCYTES                     | 1490    |
| Zhemakova                    | 27918533 | WHOLEBLOOD-exon-primary       | 2116    |
|                              |          | WHOLEBLOOD-exonratio-primary  | 2116    |
|                              |          | WHOLEBLOOD-gene-primary       | 2116    |
|                              |          | WHOLEBLOOD-polyAratio-primary | 2116    |

**Supplementary Table 11. Association between systolic and diastolic blood pressure in Europeans of the UK Biobank study and (i) the rare non-coding variant near ACE2 that was found to be associated with COVID-19 risk; and (ii) a burden of ultra-rare coding variants in ACE2 that are predicted to be loss-of-function.**

| Variant                                              | Effect allele                     | Phenotype                | Effect[95% CI]      | P-value  | N individuals with 0 1 2 copies of the effect allele | Effect allele frequency |
|------------------------------------------------------|-----------------------------------|--------------------------|---------------------|----------|------------------------------------------------------|-------------------------|
| 23:15602217:T:C                                      | C                                 | Systolic blood pressure  | 0.009[-0.022,0.041] | 5.60E-01 | 406539 1179 493                                      | 3.00E-03                |
|                                                      |                                   | Diastolic blood pressure | 0.017[-0.017,0.051] | 3.30E-01 | 406543 1179 493                                      | 3.00E-03                |
| Burden of predicted loss-of-function (pLOF) variants | Minor allele for any pLOF variant | Systolic blood pressure  | 0.219[-0.031,0.469] | 8.60E-02 | 408174 33 4                                          | 5.00E-05                |
|                                                      |                                   | Diastolic blood pressure | 0.195[-0.070,0.461] | 1.50E-01 | 408178 33 4                                          | 5.00E-05                |

Supplementary Table 12. Association between eight published risk variants for COVID-19 and five disease risk phenotypes. P-values in red were significant after correcting for the 40 tests performed (P<0.00125).

| Locus, nearest gene | rs ID                                | hg38             | Phenotype                                                        | Effect allele | Odds Ratio* [95% CI] | P-value         | N cases with 0 12 copies of the effect allele | N controls with 0 12 copies of the effect allele | Effect allele frequency | N cases | N controls | Heterozygote Odds Ratio** [95% CI] | Homozygote Odds Ratio** [95% CI] | Cross-study heterogeneity test P-value |
|---------------------|--------------------------------------|------------------|------------------------------------------------------------------|---------------|----------------------|-----------------|-----------------------------------------------|--------------------------------------------------|-------------------------|---------|------------|------------------------------------|----------------------------------|----------------------------------------|
| 3p21.31<br>SLC6A20  | rs2531743                            | 3:45796808:G:A   | COVID19 positive hospitalized vs COVID19 negative or unknown     | G             | 0.971[0.937,1.006]   | 1.07E-01        | 2398[3345]168                                 | 2343363[36160]119124                             | 0.416                   | 6911    | 689620     | 0.971[0.921,1.023]                 | 0.954[0.899,1.024]               | 0.1686                                 |
|                     |                                      |                  | COVID19 positive not hospitalized vs COVID19 negative or unknown | G             | 0.954[0.940,0.969]   | <b>8.21E-10</b> | 1615722[128]7356                              | 240080[342626]121310                             | 0.415                   | 45641   | 704016     | 0.966[0.946,0.988]                 | 0.913[0.886,0.94]                | 0.6444                                 |
|                     |                                      |                  | COVID19 positive severe vs COVID19 negative or unknown           | G             | 0.917[0.861,0.977]   | 7.19E-03        | 776[1072]336                                  | 2343363[36160]119124                             | 0.416                   | 2184    | 689620     | 0.957[0.872,1.05]                  | 0.841[0.739,0.956]               | 0.5430                                 |
|                     |                                      |                  | COVID19 positive vs COVID19 negative                             | G             | 0.943[0.927,0.958]   | <b>2.95E-12</b> | 1859225509[8529]                              | 36660[53558]19387                                | 0.416                   | 52630   | 109605     | 0.951[0.929,0.974]                 | 0.890[0.861,0.919]               | 0.6468                                 |
|                     |                                      |                  | COVID19 positive vs COVID19 negative or unknown                  | G             | 0.958[0.945,0.971]   | <b>1.19E-09</b> | 1859225509[8529]                              | 240080[342626]121310                             | 0.415                   | 52630   | 704016     | 0.968[0.948,0.987]                 | 0.919[0.894,0.945]               | 0.6063                                 |
| 3p21.31<br>LZTFL1   | rs73064425                           | 3:45859597:C:T   | COVID19 positive hospitalized vs COVID19 negative or unknown     | T             | 1.289[1.211,1.371]   | <b>9.71E-16</b> | 5713[127]71                                   | 592971[92456]4193                                | 0.073                   | 6911    | 689620     | 1.285[1.204,1.371]                 | 1.699[1.336,2.16]                | 0.0306                                 |
|                     |                                      |                  | COVID19 positive not hospitalized vs COVID19 negative or unknown | T             | 1.017[0.990,1.045]   | 2.25E-01        | 39073[6308]260                                | 605892[93863]4261                                | 0.073                   | 45641   | 704016     | 1.03[1.001,1.06]                   | 0.899[0.79,1.024]                | 0.5419                                 |
|                     |                                      |                  | COVID19 positive severe vs COVID19 negative or unknown           | T             | 1.581[1.427,1.752]   | <b>2.16E-18</b> | 1732[42]31                                    | 592971[92456]4193                                | 0.073                   | 2184    | 689620     | 1.585[1.423,1.766]                 | 2.59[1.808,3.712]                | 0.5770                                 |
|                     |                                      |                  | COVID19 positive vs COVID19 negative                             | T             | 1.067[1.035,1.100]   | <b>2.67E-05</b> | 44855[7443]332                                | 94427[14495]683                                  | 0.074                   | 52630   | 109605     | 1.076[1.043,1.111]                 | 0.958[0.836,1.098]               | 0.8732                                 |
|                     |                                      |                  | COVID19 positive vs COVID19 negative or unknown                  | T             | 1.052[1.026,1.079]   | <b>7.32E-05</b> | 44855[7443]332                                | 605892[93863]4261                                | 0.073                   | 52630   | 704016     | 1.063[1.035,1.091]                 | 1.001[0.891,1.124]               | 0.6960                                 |
| 6p21.33<br>CCHCR1   | rs143334143                          | 6:31153649:G:A   | COVID19 positive hospitalized vs COVID19 negative or unknown     | A             | 1.103[1.035,1.176]   | 2.53E-03        | 58391[0]755                                   | 592380[93262]3978                                | 0.073                   | 6911    | 689620     | 1.103[1.031,1.179]                 | 1.379[1.055,1.803]               | 0.4370                                 |
|                     |                                      |                  | COVID19 positive not hospitalized vs COVID19 negative or unknown | A             | 1.021[0.995,1.048]   | 1.07E-01        | 38299[7008]334                                | 604383[95543]4090                                | 0.074                   | 45641   | 704016     | 1.039[1.011,1.068]                 | 1.021[0.899,1.147]               | 0.7970                                 |
|                     |                                      |                  | COVID19 positive severe vs COVID19 negative or unknown           | A             | 1.175[1.054,1.310]   | 3.63E-03        | 1814[347]23                                   | 592380[93262]3978                                | 0.073                   | 2184    | 689620     | 1.166[1.039,1.308]                 | 1.727[1.143,2.611]               | 0.8028                                 |
|                     |                                      |                  | COVID19 positive vs COVID19 negative                             | A             | 1.057[1.026,1.088]   | <b>2.00E-04</b> | 441988040[392]                                | 93495[15427]683                                  | 0.079                   | 52630   | 109605     | 1.065[1.033,1.098]                 | 1.104[0.969,1.256]               | 0.4270                                 |
|                     |                                      |                  | COVID19 positive vs COVID19 negative or unknown                  | A             | 1.032[1.008,1.058]   | 9.47E-03        | 441988040[392]                                | 604383[95543]4090                                | 0.074                   | 52630   | 704016     | 1.047[1.021,1.074]                 | 1.069[0.96,1.191]                | 0.5346                                 |
| 9q34.2<br>ABO       | rs879055593<br>(proxy for rs9411378) | 9:133271182:T:C  | COVID19 positive hospitalized vs COVID19 negative or unknown     | T             | 1.096[1.054,1.139]   | <b>4.06E-06</b> | 3743[2658]510                                 | 384940[259919]44761                              | 0.253                   | 6911    | 689620     | 1.077[1.024,1.132]                 | 1.221[1.112,1.34]                | 0.7870                                 |
|                     |                                      |                  | COVID19 positive not hospitalized vs COVID19 negative or unknown | T             | 1.098[1.081,1.116]   | <b>7.88E-30</b> | 24427[18060]3154                              | 393656[264837]45523                              | 0.254                   | 45641   | 704016     | 1.114[1.091,1.137]                 | 1.156[1.111,1.203]               | 0.3500                                 |
|                     |                                      |                  | COVID19 positive severe vs COVID19 negative or unknown           | T             | 1.096[1.022,1.175]   | 1.01E-02        | 1174[852]158                                  | 384940[259919]44761                              | 0.253                   | 2184    | 689620     | 1.09[0.998,1.191]                  | 1.19[1.007,1.407]                | 0.4745                                 |
|                     |                                      |                  | COVID19 positive vs COVID19 negative                             | T             | 1.097[1.078,1.117]   | <b>9.96E-24</b> | 28215[20747]3668                              | 61047[41288]7270                                 | 0.259                   | 52630   | 109605     | 1.114[1.089,1.14]                  | 1.136[1.088,1.187]               | 0.6010                                 |
|                     |                                      |                  | COVID19 positive vs COVID19 negative or unknown                  | T             | 1.098[1.081,1.114]   | <b>7.07E-34</b> | 28215[20747]3668                              | 393656[264837]45523                              | 0.254                   | 52630   | 704016     | 1.109[1.088,1.13]                  | 1.165[1.123,1.209]               | 0.1825                                 |
| 12q24.13<br>OAS3    | rs10735079                           | 12:112942203:G:A | COVID19 positive hospitalized vs COVID19 negative or unknown     | G             | 0.968[0.934,1.003]   | 7.67E-02        | 2988[3067]856                                 | 283922[316030]89668                              | 0.359                   | 6911    | 689620     | 0.945[0.898,0.994]                 | 0.949[0.879,1.025]               | 0.6392                                 |
|                     |                                      |                  | COVID19 positive not hospitalized vs COVID19 negative or unknown | G             | 0.997[0.983,1.012]   | 7.18E-01        | 19607[20340]5694                              | 290868[322016]91132                              | 0.358                   | 45641   | 704016     | 0.976[0.956,0.997]                 | 0.992[0.961,1.024]               | 0.4075                                 |
|                     |                                      |                  | COVID19 positive severe vs COVID19 negative or unknown           | G             | 0.975[0.915,1.039]   | 4.31E-01        | 94297[32]69                                   | 283922[316030]89668                              | 0.359                   | 2184    | 689620     | 0.953[0.87,1.043]                  | 0.957[0.835,1.097]               | 0.9016                                 |
|                     |                                      |                  | COVID19 positive vs COVID19 negative                             | G             | 0.996[0.979,1.012]   | 6.09E-01        | 22636[23437]6557                              | 45628[49969]14008                                | 0.353                   | 52630   | 109605     | 0.97[0.948,0.993]                  | 0.987[0.953,1.022]               | 0.7406                                 |
|                     |                                      |                  | COVID19 positive vs COVID19 negative or unknown                  | G             | 0.993[0.979,1.007]   | 3.11E-01        | 22636[23437]6557                              | 290868[322016]91132                              | 0.357                   | 52630   | 704016     | 0.972[0.953,0.991]                 | 0.986[0.958,1.016]               | 0.3908                                 |
| 19p13.3<br>DPP9     | rs2109069                            | 19:4719431:G:A   | COVID19 positive hospitalized vs COVID19 negative or unknown     | A             | 1.100[1.061,1.141]   | <b>3.44E-07</b> | 3180[2954]777                                 | 327458[294675]67487                              | 0.312                   | 6911    | 689620     | 1.055[1.003,1.11]                  | 1.227[1.134,1.328]               | 0.0945                                 |
|                     |                                      |                  | COVID19 positive not hospitalized vs COVID19 negative or unknown | A             | 1.007[0.992,1.023]   | 3.59E-01        | 22268[19042]4331                              | 335629[299944]68443                              | 0.310                   | 45641   | 704016     | 0.994[0.973,1.015]                 | 1.027[0.992,1.064]               | 0.1766                                 |
|                     |                                      |                  | COVID19 positive severe vs COVID19 negative or unknown           | A             | 1.121[1.050,1.196]   | <b>5.93E-04</b> | 9949[36]254                                   | 327458[294675]67487                              | 0.312                   | 2184    | 689620     | 1.073[0.981,1.173]                 | 1.308[1.139,1.502]               | 0.8598                                 |
|                     |                                      |                  | COVID19 positive vs COVID19 negative                             | A             | 1.017[0.999,1.034]   | 6.21E-02        | 25489[22028]5113                              | 5301[146169]10425                                | 0.306                   | 52630   | 109605     | 1.012[0.989,1.035]                 | 1.051[1.012,1.092]               | 0.5871                                 |
|                     |                                      |                  | COVID19 positive vs COVID19 negative or unknown                  | A             | 1.019[1.004,1.034]   | 1.02E-02        | 25489[22028]5113                              | 335629[299944]68443                              | 0.310                   | 52630   | 704016     | 1.003[0.984,1.022]                 | 1.054[1.021,1.089]               | 0.5211                                 |
| 19p13.2<br>RAVER1   | rs74956615                           | 19:10317045:T:A  | COVID19 positive hospitalized vs COVID19 negative or unknown     | A             | 1.092[1.011,1.180]   | 2.59E-02        | 6201[68]129                                   | 620702[67104]1814                                | 0.051                   | 6911    | 689620     | 1.052[0.971,1.139]                 | 1.668[1.155,2.41]                | 0.0060                                 |
|                     |                                      |                  | COVID19 positive not hospitalized vs COVID19 negative or unknown | A             | 1.012[0.978,1.046]   | 4.97E-01        | 413544[180]107                                | 634281[67914]1821                                | 0.051                   | 45641   | 704016     | 1.007[0.973,1.042]                 | 0.959[0.784,1.174]               | 0.3301                                 |
|                     |                                      |                  | COVID19 positive severe vs COVID19 negative or unknown           | A             | 1.244[1.087,1.424]   | 1.58E-03        | 1937[2389]                                    | 620702[67104]1814                                | 0.051                   | 2184    | 689620     | 1.188[1.037,1.36]                  | 1.672[0.867,3.225]               | 0.1839                                 |
|                     |                                      |                  | COVID19 positive vs COVID19 negative                             | A             | 1.022[0.984,1.060]   | 2.60E-01        | 47425[4863]136                                | 98596[10384]282                                  | 0.050                   | 52424   | 109262     | 1.008[0.972,1.046]                 | 1.068[0.865,1.319]               | 0.9762                                 |
|                     |                                      |                  | COVID19 positive vs COVID19 negative or unknown                  | A             | 1.022[0.991,1.055]   | 1.64E-01        | 47630[4864]136                                | 634281[67914]1821                                | 0.051                   | 52630   | 704016     | 1.012[0.98,1.044]                  | 1.061[0.886,1.27]                | 0.3694                                 |
| 21q22.1<br>IFNAR2   | rs2236757                            | 21:33252612:A:G  | COVID19 positive hospitalized vs COVID19 negative or unknown     | A             | 1.079[1.039,1.120]   | <b>7.34E-05</b> | 3369[2898]644                                 | 351679[280661]57280                              | 0.287                   | 6911    | 689620     | 1.079[1.026,1.134]                 | 1.165[1.07,1.269]                | 0.4116                                 |
|                     |                                      |                  | COVID19 positive not hospitalized vs COVID19 negative or unknown | A             | 1.012[0.996,1.028]   | 1.51E-01        | 22463[18988]4190                              | 358003[286693]59320                              | 0.289                   | 45641   | 704016     | 1.021[1.01,1.042]                  | 1.031[0.995,1.069]               | 0.2857                                 |
|                     |                                      |                  | COVID19 positive severe vs COVID19 negative or unknown           | A             | 1.140[1.066,1.218]   | <b>1.10E-04</b> | 1032[930]222                                  | 351679[280661]57280                              | 0.287                   | 2184    | 689620     | 1.125[1.029,1.23]                  | 1.295[1.118,1.5]                 | 0.3644                                 |
|                     |                                      |                  | COVID19 positive vs COVID19 negative                             | A             | 1.026[1.009,1.045]   | 3.50E-03        | 25861[21920]4849                              | 55434[44836]9335                                 | 0.293                   | 52630   | 109605     | 1.029[1.005,1.052]                 | 1.054[1.013,1.096]               | 0.8180                                 |
|                     |                                      |                  | COVID19 positive vs COVID19 negative or unknown                  | A             | 1.023[1.008,1.038]   | 2.51E-03        | 25861[21920]4849                              | 358003[286693]59320                              | 0.289                   | 52630   | 704016     | 1.028[1.008,1.048]                 | 1.048[1.014,1.083]               | 0.6665                                 |

\* Estimated based on trans-ancestry inverse-variance meta-analysis across UKB, AncestryDNA, GHS and UPENN-PMBB.

\*\* Estimated based on ancestry-specific genotype counts in UKB, AncestryDNA, GHS and UPENN-PMBB, using the Mantel-Haenszel procedure.



**Supplementary Table 13. Comparison of effect sizes between ancestries for the six published risk variants that were validated in this study.**

| Locus, nearest gene | rs ID                                | hg38            | Effect allele  | Phenotype                                                    | Ancestry | Odds Ratio (95% CI) | P-value  | N cases with 0 1 2 copies of the effect allele | N controls with 0 1 2 copies of the effect allele | Effect allele frequency | Cross-ancestry heterogeneity test P-value |
|---------------------|--------------------------------------|-----------------|----------------|--------------------------------------------------------------|----------|---------------------|----------|------------------------------------------------|---------------------------------------------------|-------------------------|-------------------------------------------|
| 3p21.31<br>SLC6A20  | rs2531743                            | 3:45796808:G:A  | G              | COVID19 positive vs COVID19 negative                         | AFR      | 0.9 (0.84, 0.98)    | 0.0091   | 716 1353 657                                   | 1200 2672 1327                                    | 0.504                   | 0.647                                     |
|                     |                                      |                 |                |                                                              | AMR      | 0.91 (0.85, 0.98)   | 0.0155   | 1606 1778 456                                  | 1457 1727 525                                     | 0.362                   |                                           |
|                     |                                      |                 |                |                                                              | EAS      | 0.96 (0.6, 1.54)    | 0.8615   | 142 60 4                                       | 228 101 14                                        | 0.179                   |                                           |
|                     |                                      |                 |                |                                                              | EUR      | 0.95 (0.93, 0.96)   | 8.41E-10 | 15747 21938 7338                               | 33271 48507 17392                                 | 0.416                   |                                           |
|                     |                                      |                 |                |                                                              | SAS      | 0.94 (0.79, 1.12)   | 0.498    | 381 380 74                                     | 504 551 129                                       | 0.331                   |                                           |
| 3p21.31<br>LZTFL1   | rs73064425                           | 3:45859597:C:T  | T              | COVID19 positive severe vs COVID19 negative or unknown       | AFR      | 1.11 (0.42, 2.95)   | 0.8284   | 126 3 1                                        | 224 3 64 2                                        | 0.014                   | 0.577                                     |
|                     |                                      |                 |                |                                                              | AMR      | 1.63 (0.81, 3.27)   | 0.1731   | 69 11 1                                        | 11052 1236 35                                     | 0.053                   |                                           |
|                     |                                      |                 |                |                                                              | EUR      | 1.6 (1.44, 1.78)    | 4.32E-18 | 1522 391 28                                    | 553956 86912 3491                                 | 0.073                   |                                           |
|                     |                                      |                 |                |                                                              | SAS      | 1.26 (0.68, 2.31)   | 0.4591   | 15 16 1                                        | 5550 3667 665                                     | 0.253                   |                                           |
|                     |                                      |                 |                |                                                              | AFR      | 1.0 (0.86, 1.17)    | 0.9888   | 24 2 307 7                                     | 4640 542 17                                       | 0.057                   |                                           |
| AMR                 | 1.02 (0.92, 1.14)                    | 0.6816          | 2937 846 57    | 2904 747 58                                                  | 0.121    |                     |          |                                                |                                                   |                         |                                           |
| EAS                 | 0.8 (0.44, 1.44)                     | 0.4582          | 166 36 4       | 285 55 3                                                     | 0.096    |                     |          |                                                |                                                   |                         |                                           |
| EUR                 | 1.06 (1.03, 1.1)                     | 0.0001          | 38029 6686 308 | 84722 13856 592                                              | 0.077    |                     |          |                                                |                                                   |                         |                                           |
| SAS                 | 1.09 (0.87, 1.35)                    | 0.4527          | 654 165 16     | 944 227 13                                                   | 0.111    |                     |          |                                                |                                                   |                         |                                           |
| 9q34.2<br>ABO       | rs879055593<br>(proxy for rs9411378) | 9:133271182:T:C | T              | COVID19 positive vs COVID19 negative or unknown              | AFR      | 1.1 (1.01, 1.2)     | 0.0224   | 1781 858 87                                    | 18064 7277 765                                    | 0.171                   | 0.183                                     |
|                     |                                      |                 |                |                                                              | AMR      | 1.16 (1.08, 1.24)   | 2.42E-05 | 2391 1272 177                                  | 8706 4386 538                                     | 0.203                   |                                           |
|                     |                                      |                 |                |                                                              | EAS      | 1.23 (0.93, 1.64)   | 0.1535   | 123 75 8                                       | 1815 851 113                                      | 0.196                   |                                           |
|                     |                                      |                 |                |                                                              | EUR      | 1.1 (1.08, 1.11)    | 7.89E-30 | 23347 18306 3370                               | 358276 249302 43780                               | 0.260                   |                                           |
|                     |                                      |                 |                |                                                              | SAS      | 0.95 (0.83, 1.1)    | 0.491    | 573 236 26                                     | 6795 3021 327                                     | 0.180                   |                                           |
| 19p13.3<br>DPP9     | rs2109069                            | 19:4719431:G:A  | A              | COVID19 positive hospitalized vs COVID19 negative or unknown | AFR      | 1.32 (1.11, 1.56)   | 0.0014   | 229 155 31                                     | 14025 7882 1149                                   | 0.221                   | 0.094                                     |
|                     |                                      |                 |                |                                                              | AMR      | 0.94 (0.74, 1.2)    | 0.6154   | 116 72 11                                      | 6722 4760 841                                     | 0.261                   |                                           |
|                     |                                      |                 |                |                                                              | EUR      | 1.09 (1.05, 1.14)   | 4.87E-06 | 2743 2672 726                                  | 300516 278789 65054                               | 0.317                   |                                           |
|                     |                                      |                 |                |                                                              | SAS      | 1.15 (0.85, 1.56)   | 0.3533   | 92 55 9                                        | 6195 3244 443                                     | 0.209                   |                                           |
|                     |                                      |                 |                |                                                              | AFR      | 1.05 (0.88, 1.25)   | 0.5825   | 245 145 25                                     | 13867 7992 1197                                   | 0.225                   |                                           |
| AMR                 | 1.25 (1.02, 1.53)                    | 0.0355          | 55 11 33       | 4813 5759 1751                                               | 0.377    |                     |          |                                                |                                                   |                         |                                           |
| EUR                 | 1.08 (1.03, 1.12)                    | 0.0003          | 3011 2578 552  | 329458 262225 52676                                          | 0.285    |                     |          |                                                |                                                   |                         |                                           |
| SAS                 | 1.03 (0.81, 1.32)                    | 0.7863          | 58 64 34       | 3541 4685 1656                                               | 0.405    |                     |          |                                                |                                                   |                         |                                           |

**Supplementary Table 14. Association between two severity phenotypes and six published risk variants for COVID-19 that validated in this study.**

| Locus, nearest gene | rs ID                             | hg38            | Phenotype                                                                   | Effect allele | Odds Ratio* [95% CI] | P-value         | N cases with 0 1 2 copies of the effect allele | N controls with 0 1 2 copies of the effect allele | Effect allele frequency | N cases | N controls | Heterozygote Odds Ratio** [95% CI] | Homozygote Odds Ratio** [95% CI] | Cross-study heterogeneity test P-value |
|---------------------|-----------------------------------|-----------------|-----------------------------------------------------------------------------|---------------|----------------------|-----------------|------------------------------------------------|---------------------------------------------------|-------------------------|---------|------------|------------------------------------|----------------------------------|----------------------------------------|
| 3p21.31<br>SLC6A20  | rs2531743                         | 3:45796808:G:A  | COVID19 positive hospitalized vs COVID19 positive not hospitalized combined | G             | 1.023[0.980,1.068]   | 2.99E-01        | 2398 3345 1168                                 | 15913 21963 7309                                  | 0.406                   | 6911    | 45185      | 1.016[0.958,1.078]                 | 1.038[0.959,1.124]               | 0.1999                                 |
|                     |                                   |                 | COVID19 positive severe vs COVID19 positive not hospitalized combined       | G             | 0.949[0.884,1.019]   | 1.47E-01        | 776 1072 336                                   | 15913 21963 7309                                  | 0.405                   | 2184    | 45185      | 1.000[0.909,1.1]                   | 0.92[0.806,1.051]                | 0.5371                                 |
| 3p21.31<br>LZTFL1   | rs73064425                        | 3:45859597:C:T  | COVID19 positive hospitalized vs COVID19 positive not hospitalized combined | T             | 1.338[1.243,1.442]   | <b>1.50E-14</b> | 5713 11277 1                                   | 38671 6256 258                                    | 0.077                   | 6911    | 45185      | 1.269[1.18,1.365]                  | 1.835[1.393,2.418]               | 0.0522                                 |
|                     |                                   |                 | COVID19 positive severe vs COVID19 positive not hospitalized combined       | T             | 1.591[1.417,1.786]   | <b>4.28E-15</b> | 1732 421 31                                    | 38671 6256 258                                    | 0.077                   | 2184    | 45185      | 1.545[1.381,1.728]                 | 2.81[1.916,4.121]                | 0.5010                                 |
| 6p21.33<br>CCHCR1   | rs143334143                       | 6:31153649:G:A  | COVID19 positive hospitalized vs COVID19 positive not hospitalized combined | A             | 1.097[1.018,1.182]   | <b>1.54E-02</b> | 5839 1017 55                                   | 37929 6929 327                                    | 0.084                   | 6911    | 45185      | 1.055[0.98,1.137]                  | 1.363[1.011,1.836]               | 0.2440                                 |
|                     |                                   |                 | COVID19 positive severe vs COVID19 positive not hospitalized combined       | A             | 1.142[1.013,1.289]   | <b>3.06E-02</b> | 1814 347 23                                    | 37929 6929 327                                    | 0.084                   | 2184    | 45185      | 1.115[0.99,1.255]                  | 1.71[1.111,2.631]                | 0.6952                                 |
| 9q34.2<br>ABO       | rs879055593 (proxy for rs9411378) | 9:133271182:T:C | COVID19 positive hospitalized vs COVID19 positive not hospitalized combined | T             | 1.022[0.976,1.071]   | 3.56E-01        | 3743 2658 510                                  | 24131 17915 3139                                  | 0.268                   | 6911    | 45185      | 0.972[0.919,1.028]                 | 1.049[0.945,1.165]               | 0.9457                                 |
|                     |                                   |                 | COVID19 positive severe vs COVID19 positive not hospitalized combined       | T             | 1.000[0.926,1.080]   | 9.98E-01        | 1174 852 158                                   | 24131 17915 3139                                  | 0.268                   | 2184    | 45185      | 0.979[0.894,1.073]                 | 1.023[0.861,1.216]               | 0.4760                                 |
| 19p13.3<br>DPP9     | rs2109069                         | 19:4719431:G:A  | COVID19 positive hospitalized vs COVID19 positive not hospitalized combined | A             | 1.081[1.034,1.129]   | <b>5.66E-04</b> | 3180 2954 777                                  | 21966 18903 4316                                  | 0.308                   | 6911    | 45185      | 1.067[1.008,1.128]                 | 1.223[1.119,1.337]               | 0.0077                                 |
|                     |                                   |                 | COVID19 positive severe vs COVID19 positive not hospitalized combined       | A             | 1.097[1.021,1.180]   | <b>1.20E-02</b> | 994 936 254                                    | 21966 18903 4316                                  | 0.306                   | 2184    | 45185      | 1.082[0.986,1.186]                 | 1.281[1.111,1.479]               | 0.4921                                 |
| 21q22.1<br>IFNAR2   | rs2236757                         | 21:33252612:A:G | COVID19 positive hospitalized vs COVID19 positive not hospitalized combined | A             | 1.075[1.027,1.124]   | <b>1.76E-03</b> | 3369 2898 644                                  | 22305 18785 4095                                  | 0.299                   | 6911    | 45185      | 1.064[1.006,1.125]                 | 1.137[1.033,1.251]               | 0.6332                                 |
|                     |                                   |                 | COVID19 positive severe vs COVID19 positive not hospitalized combined       | A             | 1.101[1.022,1.185]   | <b>1.09E-02</b> | 1032 930 222                                   | 22305 18785 4095                                  | 0.299                   | 2184    | 45185      | 1.102[1.006,1.208]                 | 1.257[1.081,1.463]               | 0.3129                                 |

\* Estimated based on trans-ancestry inverse-variance meta-analysis across UKB, AncestryDNA, GHS and UPENN-PMBB.

\*\* Estimated based on ancestry-specific genotype counts in UKB, AncestryDNA, GHS and UPENN-PMBB, using the Mantel-Haenszel procedure.



**Supplementary Table 16. Missense or predicted loss-of-function variants in high linkage disequilibrium (LD,  $r^2 > 0.80$ ) with sentinel GWAS variants.**

| Locus   | Sentinel GWAS variant |                 |               | Missense or pLOF in high LD with lead variant |            |                 |                                |                    |
|---------|-----------------------|-----------------|---------------|-----------------------------------------------|------------|-----------------|--------------------------------|--------------------|
|         | rs ID                 | hg38            | Nearest gene  | Gene                                          | rs ID      | hg38            | r2 with sentinel GWAS variant* | Variant effect     |
| 21q22.1 | rs2236757             | 21:33252612:A:G | <i>IFNAR2</i> | <i>IFNAR2</i>                                 | rs1051393  | 21:33241950:T:G | 0.88                           | Missense:Phe10Val  |
|         |                       |                 |               |                                               | rs1131668  | 21:33262573:G:A | 0.86                           | Missense:Ala285Thr |
| 6p21.33 | rs143334143           | 6:31153649:G:A  | <i>CCHCR1</i> | <i>CCHCR1</i>                                 | rs130072   | 6:31144707:C:T  | 1.00                           | Missense:Arg716Gln |
|         |                       |                 |               |                                               | rs11540822 | 6:31151121:A:T  | 1.00                           | Missense:Leu268Gln |
|         |                       |                 |               |                                               | rs72856718 | 6:31157480:C:A  | 1.00                           | Stop_gained:Glu41X |
|         |                       |                 |               | <i>TCF19</i>                                  | rs2073724  | 6:31161930:C:T  | 1.00                           | Missense:Pro241Leu |
|         |                       |                 |               | <i>C6orf15</i>                                | rs2233976  | 6:31112217:C:T  | 0.87                           | Missense:Gly48Arg  |
|         |                       |                 |               | <i>PSORS1C1</i>                               | rs1265097  | 6:31138682:C:A  | 0.84                           | Missense:Pro24Thr  |

\* LD estimated based on individuals of European ancestry from the 1000 Genomes project

**Supplementary Table 17. Expression quantitative trait loci (eQTL) that co-localized (LD r2>0.80) with sentinel GWAS variants.**

| Sentinel GWAS variant |                 |                 |                             | Sentinel eQTL   |                   |                             |                                            |                 |               |                  |         |                                |                                                  |
|-----------------------|-----------------|-----------------|-----------------------------|-----------------|-------------------|-----------------------------|--------------------------------------------|-----------------|---------------|------------------|---------|--------------------------------|--------------------------------------------------|
| Locus                 | rs ID           | hg38            | Disease predisposing allele | rs ID           | hg38              | Gene                        | eQTL dataset                               | P-value         | Effect allele | Reference allele | Effect  | r2 with sentinel GWAS variant* | Allele in phase with disease predisposing allele |
| 3p21.31               | rs73064425      | 3:45859597:C:T  | T                           | rs17763537      | 3:45801823:C:T    | SLC6A20                     | Hao Lung                                   | 1.00E-16        | C             | T                | -9.32   | 0.961                          | T                                                |
|                       | rs11919389      | 3:101705614:T:C | T                           | rs36002990      | 3:101719018:G:A   | NXPE3                       | GTeXv8 Esophagus Muscularis                | 3.27E-40        | A             | G                | -0.753  | 0.99                           | G                                                |
| 3p21.31               | rs11919389      | 3:101705614:T:C | T                           | rs13100262      | 3:101695258:T:C   | NXPE3                       | Pala Leucocytes isoQTL                     | 6.25E-17        | T             | C                | 0.535   | 0.962                          | T                                                |
|                       | rs11919389      | 3:101705614:T:C | T                           | rs13100262      | 3:101695258:T:C   | NXPE3                       | GTeXv8 Esophagus Gastroesophageal Junction | 1.88E-16        | C             | T                | -0.452  | 0.962                          | T                                                |
|                       | rs11919389      | 3:101705614:T:C | T                           | rs11923273      | 3:101619019:T:C   | SENP7                       | Zhemakova Whole Blood gene                 | 6.53E-40        | C             | T                | -13.222 | 0.81                           | T                                                |
|                       | rs11919389      | 3:101705614:T:C | T                           | rs11923273      | 3:101619019:T:C   | SENP7                       | Pala Leucocytes                            | 4.25E-14        | T             | C                | 0.372   | 0.81                           | T                                                |
|                       | rs143334143     | 6:31153649:G:A  | A                           | rs130072        | 6:31144707:C:T    | TCF19                       | Yao Whole Blood                            | 2.14E-96        | C             | T                | -0.092  | 0.999                          | T                                                |
| 6p21.33               | rs143334143     | 6:31153649:G:A  | A                           | rs130072        | 6:31144707:C:T    | TCF19                       | GTeXv8 Lung                                | 8.91E-11        | T             | C                | 0.416   | 0.999                          | T                                                |
|                       | rs143334143     | 6:31153649:G:A  | A                           | rs114881571     | 6:31160828:C:T    | TCF19                       | Jansen Whole Blood                         | 1.20E-35        | T             | NA               | 0.416   | 0.998                          | T                                                |
|                       | rs143334143     | 6:31153649:G:A  | A                           | rs112279190     | 6:31155370:C:T    | TCF19                       | GTeXv8 Artery Aorta                        | 2.14E-22        | T             | C                | 1.019   | 0.998                          | T                                                |
|                       | rs143334143     | 6:31153649:G:A  | A                           | rs150765547     | 6:31191804:G:A    | LST1                        | Vosa Whole Blood                           | 2.01E-27        | A             | G                | -10.849 | 0.99                           | A                                                |
|                       | rs143334143     | 6:31153649:G:A  | A                           | rs11540822      | 6:31151121:A:T    | HLA-C                       | GTeXv8 Adipose Subcutaneous                | 1.28E-10        | T             | A                | 0.407   | 0.989                          | T                                                |
|                       | rs143334143     | 6:31153649:G:A  | A                           | rs72863830      | 6:31221764:G:A    | TCF19                       | GTeXv8 Whole Blood                         | 9.62E-19        | A             | G                | 0.324   | 0.98                           | A                                                |
|                       | rs143334143     | 6:31153649:G:A  | A                           | rs17197087      | 6:31158455:C:T    | TCF19                       | Zhemakova Whole Blood gene                 | 4.90E-156       | T             | C                | 26.612  | 0.976                          | T                                                |
|                       | rs143334143     | 6:31153649:G:A  | A                           | rs17197087      | 6:31158455:C:T    | TCF19                       | Joehanes Whole Blood                       | 1.61E-98        | C             | T                | -0.091  | 0.976                          | T                                                |
|                       | rs143334143     | 6:31153649:G:A  | A                           | rs17197087      | 6:31158455:C:T    | TCF19                       | Ratnapryia Retina                          | 4.25E-30        | T             | C                | 1.371   | 0.976                          | T                                                |
|                       | rs143334143     | 6:31153649:G:A  | A                           | rs17197087      | 6:31158455:C:T    | TCF19                       | GTeXv8 Brain Cortex                        | 3.28E-22        | T             | C                | 1.142   | 0.976                          | T                                                |
|                       | rs143334143     | 6:31153649:G:A  | A                           | rs17197087      | 6:31158455:C:T    | TCF19                       | GTeXv8 Pituitary                           | 4.58E-22        | T             | C                | 1.108   | 0.976                          | T                                                |
|                       | rs143334143     | 6:31153649:G:A  | A                           | rs17197087      | 6:31158455:C:T    | TCF19                       | Chen CD4Tcells                             | 1.35E-18        | T             | C                | 1.82    | 0.976                          | T                                                |
|                       | rs143334143     | 6:31153649:G:A  | A                           | rs17197087      | 6:31158455:C:T    | TCF19                       | GTeXv8 Brain Cerebellar Hemisphere         | 1.95E-17        | T             | C                | 1.215   | 0.976                          | T                                                |
|                       | rs143334143     | 6:31153649:G:A  | A                           | rs17197087      | 6:31158455:C:T    | TCF19                       | GTeXv8 Brain Hypothalamus                  | 8.32E-17        | T             | C                | 1.383   | 0.976                          | T                                                |
|                       | rs143334143     | 6:31153649:G:A  | A                           | rs17197087      | 6:31158455:C:T    | TCF19                       | GTeXv8 Muscle Skeletal                     | 6.93E-14        | T             | C                | 0.474   | 0.976                          | T                                                |
|                       | rs143334143     | 6:31153649:G:A  | A                           | rs17197087      | 6:31158455:C:T    | TCF19                       | GTeXv8 Brain Caudate basal ganglia         | 4.73E-10        | T             | C                | 1.02    | 0.976                          | T                                                |
|                       | rs143334143     | 6:31153649:G:A  | A                           | rs17197087      | 6:31158455:C:T    | TCF19                       | GTeXv8 Brain Frontal Cortex BA9            | 6.53E-10        | T             | C                | 0.961   | 0.976                          | T                                                |
|                       | rs143334143     | 6:31153649:G:A  | A                           | rs17197087      | 6:31158455:C:T    | TCF19                       | GTeXv8 Brain Amygdala                      | 1.14E-09        | T             | C                | 1.241   | 0.976                          | T                                                |
|                       | rs143334143     | 6:31153649:G:A  | A                           | rs17197101      | 6:31158632:G:T    | TCF19                       | Battle Whole Blood                         | 3.43E-99        | NA            | NA               | 0       | 0.975                          | T                                                |
|                       | 21q22.1         | rs143334143     | 6:31153649:G:A              | A               | rs17197101        | 6:31158632:G:T              | TCF19                                      | Pala Leucocytes | 2.95E-49      | G                | T       | -1.648                         | 0.975                                            |
| rs143334143           |                 | 6:31153649:G:A  | A                           | rs17197101      | 6:31158632:G:T    | TCF19                       | Davenport Whole Blood                      | 1.50E-36        | T             | G                | 0.438   | 0.975                          | T                                                |
| rs143334143           |                 | 6:31153649:G:A  | A                           | rs17197101      | 6:31158632:G:T    | TCF19                       | Walsh Whole Blood                          | 2.54E-15        | NA            | NA               | 0       | 0.975                          | T                                                |
| rs143334143           |                 | 6:31153649:G:A  | A                           | rs2233976       | 6:31112217:C:T    | TCF19                       | Raj CD4Tcells                              | 2.02E-27        | NA            | NA               | 0       | 0.872                          | T                                                |
| rs2236757             |                 | 21:33252612:A:G | A                           | rs3153          | 21:33237200:G:A   | IFNAR2                      | Westra Whole Blood                         | 1.97E-71        | A             | G                | 17.871  | 0.997                          | A                                                |
| rs2236757             |                 | 21:33252612:A:G | A                           | rs574424283     | 21:33232654:T:TAA | IL10RB                      | Brown LCLs                                 | 5.24E-11        | NA            | NA               | 0       | 0.997                          | TAA                                              |
| rs2236757             |                 | 21:33252612:A:G | A                           | rs12053666      | 21:33246134:G:A   | IL10RB                      | Kasela CD4Tcells                           | 4.07E-13        | A             | G                | 7.253   | 0.995                          | A                                                |
| rs2236757             |                 | 21:33252612:A:G | A                           | rs2834163       | 21:33248146:G:A   | IFNAR2                      | GTeXv8 Muscle Skeletal                     | 1.01E-15        | A             | G                | -0.239  | 0.883                          | G                                                |
| rs2236757             |                 | 21:33252612:A:G | A                           | rs2252639       | 21:33245424:A:G   | IFNAR2                      | LloydJones Whole Blood                     | 4.60E-44        | A             | G                | 0.411   | 0.88                           | A                                                |
| rs2236757             |                 | 21:33252612:A:G | A                           | rs17860115      | 21:33230000:C:A   | IFNAR2                      | Huang LCLs                                 | 1.85E-24        | C             | NA               | 0.483   | 0.88                           | A                                                |
| rs2236757             |                 | 21:33252612:A:G | A                           | rs17860115      | 21:33230000:C:A   | IFNAR2                      | Fairfax Monocytes naive                    | 1.84E-20        | NA            | NA               | 0       | 0.88                           | A                                                |
| rs2236757             |                 | 21:33252612:A:G | A                           | rs17860115      | 21:33230000:C:A   | IFNAR2                      | Huang PBMCs                                | 5.92E-20        | C             | NA               | 0.678   | 0.88                           | A                                                |
| rs2236757             |                 | 21:33252612:A:G | A                           | rs17860115      | 21:33230000:C:A   | IFNAR2                      | Hao Lung                                   | 1.00E-16        | C             | A                | 11      | 0.88                           | A                                                |
| rs2236757             |                 | 21:33252612:A:G | A                           | rs2834158       | 21:33244908:T:C   | IFNAR2                      | Fairfax Monocytes IFN                      | 2.22E-13        | NA            | NA               | 0       | 0.88                           | T                                                |
| rs2236757             |                 | 21:33252612:A:G | A                           | rs17860115      | 21:33230000:C:A   | IFNAR2                      | Momozawa Monocytes                         | 4.09E-11        | A             | C                | -0.118  | 0.88                           | A                                                |
| rs2236757             |                 | 21:33252612:A:G | A                           | rs12482556      | 21:33230629:T:C   | IFNAR2                      | Momozawa CD4Tcells                         | 1.54E-16        | C             | T                | -0.147  | 0.879                          | C                                                |
| rs2236757             |                 | 21:33252612:A:G | A                           | rs2236758       | 21:33253108:A:G   | IFNAR2                      | Battle Whole Blood splice                  | 1.92E-147       | NA            | NA               | 0       | 0.878                          | A                                                |
| rs2236757             |                 | 21:33252612:A:G | A                           | rs2236758       | 21:33253108:A:G   | IFNAR2                      | Fehrmann Whole Blood                       | 3.80E-19        | A             | G                | 8.94    | 0.878                          | A                                                |
| rs2236757             |                 | 21:33252612:A:G | A                           | rs2250226       | 21:33260011:T:C   | IL10RB                      | Westra Whole Blood                         | 2.51E-13        | C             | T                | 7.319   | 0.878                          | C                                                |
| rs2236757             |                 | 21:33252612:A:G | A                           | rs17860241      | 21:33258828:A:G   | IFNAR2                      | Brown LCLs                                 | 1.17E-30        | NA            | NA               | 0       | 0.876                          | G                                                |
| rs2236757             | 21:33252612:A:G | A               | rs17860241                  | 21:33258828:A:G | IFNAR2            | GTeXv8 Adipose Subcutaneous | 3.71E-18                                   | G               | A             | -0.287           | 0.876   | G                              |                                                  |

|           |                 |   |            |                  |        |                                   |           |    |    |         |       |    |
|-----------|-----------------|---|------------|------------------|--------|-----------------------------------|-----------|----|----|---------|-------|----|
| rs2236757 | 21:33252612:A:G | A | rs17860241 | 21:33258828:A:G  | IFNAR2 | GTeV8 Esophagus Mucosa            | 1.49E-16  | G  | A  | -0.292  | 0.876 | G  |
| rs2236757 | 21:33252612:A:G | A | rs11911133 | 21:33256870:A:G  | IFNAR2 | Vosa Whole Blood                  | 2.09E-280 | G  | A  | -35.782 | 0.875 | G  |
| rs2236757 | 21:33252612:A:G | A | rs11911133 | 21:33256870:A:G  | IFNAR2 | Davenport Whole Blood             | 3.37E-16  | G  | A  | -0.114  | 0.875 | G  |
| rs2236757 | 21:33252612:A:G | A | rs9975538  | 21:33254549:C:T  | IL10RB | GTeV8 Muscle Skeletal             | 3.91E-13  | T  | C  | -0.253  | 0.875 | C  |
| rs2236757 | 21:33252612:A:G | A | rs6517156  | 21:33261740:C:G  | IL10RB | Vosa Whole Blood                  | 1.16E-117 | G  | C  | 23.06   | 0.862 | G  |
| rs2236757 | 21:33252612:A:G | A | rs6517156  | 21:33261740:C:G  | IL10RB | Joehanes Whole Blood              | 5.21E-41  | C  | G  | -0.038  | 0.862 | G  |
| rs2236757 | 21:33252612:A:G | A | rs6517156  | 21:33261740:C:G  | IFNAR2 | Lappalainen LCLs                  | 7.65E-36  | NA | NA | 0       | 0.862 | G  |
| rs2236757 | 21:33252612:A:G | A | rs6517156  | 21:33261740:C:G  | IL10RB | GTeV8 Cells Cultured fibroblasts  | 1.82E-29  | G  | C  | -0.264  | 0.862 | G  |
| rs2236757 | 21:33252612:A:G | A | rs6517156  | 21:33261740:C:G  | IFNAR2 | Brown Adipose                     | 2.87E-25  | NA | NA | 0       | 0.862 | G  |
| rs2236757 | 21:33252612:A:G | A | rs6517156  | 21:33261740:C:G  | IL10RB | GTeV8 Brain Cerebellum            | 4.75E-25  | G  | C  | 0.687   | 0.862 | G  |
| rs2236757 | 21:33252612:A:G | A | rs6517156  | 21:33261740:C:G  | IL10RB | GTeV8 Brain Cerebellar Hemisphere | 4.35E-17  | G  | C  | 0.586   | 0.862 | G  |
| rs2236757 | 21:33252612:A:G | A | rs6517156  | 21:33261740:C:G  | IL10RB | GTeV8 Brain Cortex                | 2.64E-12  | G  | C  | 0.427   | 0.862 | G  |
| rs2236757 | 21:33252612:A:G | A | rs1131668  | 21:33262573:G:A  | IFNAR2 | Walsh Whole Blood                 | 1.60E-30  | NA | NA | 0       | 0.86  | A  |
| rs2236757 | 21:33252612:A:G | A | rs1131668  | 21:33262573:G:A  | IFNAR2 | Alasoo Macrophages naive          | 1.14E-12  | NA | NA | 0       | 0.86  | A  |
| rs2236757 | 21:33252612:A:G | A | rs1131668  | 21:33262573:G:A  | IFNAR2 | Alasoo Macrophages IFNg           | 3.25E-10  | NA | NA | 0       | 0.86  | A  |
| rs2236757 | 21:33252612:A:G | A | rs3216172  | 21:33262748:G:GT | IL10RB | GTeV8 Nerve Tibial                | 1.62E-14  | GT | G  | 0.344   | 0.857 | GT |

\* LD estimated based on individuals of European ancestry from the 1000 Genomes project

**Supplementary Table 18. Association between a 6-SNP genetic risk score (GRS) and risk of hospitalization among COVID-19 cases.**

| Population, total N<br>COVID-19 cases | GRS Group                     | Risk of hospitalization among COVID-19 cases<br>(N positive and hospitalized / N positive) x 100 |                    | Unadjusted<br>Risk<br>Difference | Adjusted Odds Ratio* |      |      |       |         |
|---------------------------------------|-------------------------------|--------------------------------------------------------------------------------------------------|--------------------|----------------------------------|----------------------|------|------|-------|---------|
|                                       |                               | Highest GRS group                                                                                | Rest of Population |                                  | Estimate             | SE   | LCI  | UCI   | P-value |
| <b>European (EUR) ancestry</b>        |                               |                                                                                                  |                    |                                  |                      |      |      |       |         |
| AncestryDNA EUR<br>N=25,353           | Top 40% vs Rest of population | 7.33 (729/9947)                                                                                  | 4.90 (755/15406)   | 2.43                             | 1.54                 | 0.06 | 1.38 | 1.72  | 6.7E-15 |
|                                       | Top 30% vs Rest of population | 7.40 (555/7501)                                                                                  | 5.20 (929/17852)   | 2.20                             | 1.46                 | 0.06 | 1.31 | 1.64  | 4.2E-11 |
|                                       | Top 20% vs Rest of population | 8.09 (407/5029)                                                                                  | 5.30 (1077/20324)  | 2.79                             | 1.59                 | 0.06 | 1.40 | 1.80  | 2.5E-13 |
|                                       | Top 10% vs Rest of population | 9.04 (228/2522)                                                                                  | 5.50 (1256/22831)  | 3.54                             | 1.75                 | 0.08 | 1.50 | 2.04  | 1.4E-12 |
|                                       | Top 5% vs Rest of population  | 9.73 (120/1233)                                                                                  | 5.66 (1364/24120)  | 4.08                             | 1.75                 | 0.11 | 1.43 | 2.16  | 1.1E-07 |
| GHS EUR<br>N=5,285                    | Top 40% vs Rest of population | 16.23 (343/2114)                                                                                 | 13.65 (433/3171)   | 2.57                             | 1.23                 | 0.09 | 1.03 | 1.48  | 0.024   |
|                                       | Top 30% vs Rest of population | 16.77 (266/1586)                                                                                 | 13.79 (510/3699)   | 2.98                             | 1.25                 | 0.10 | 1.03 | 1.51  | 0.024   |
|                                       | Top 20% vs Rest of population | 18.07 (191/1057)                                                                                 | 13.84 (585/4228)   | 4.23                             | 1.32                 | 0.11 | 1.07 | 1.64  | 0.011   |
|                                       | Top 10% vs Rest of population | 18.34 (97/529)                                                                                   | 14.28 (679/4756)   | 4.06                             | 1.28                 | 0.15 | 0.96 | 1.70  | 0.091   |
| UKB EUR<br>N=14,320                   | Top 40% vs Rest of population | 28.25 (1479/5235)                                                                                | 26.41 (2399/9085)  | 1.85                             | 1.13                 | 0.04 | 1.03 | 1.23  | 6.1E-03 |
|                                       | Top 30% vs Rest of population | 28.37 (1214/4279)                                                                                | 26.53 (2664/10041) | 1.84                             | 1.13                 | 0.05 | 1.03 | 1.23  | 0.011   |
|                                       | Top 20% vs Rest of population | 28.09 (795/2830)                                                                                 | 26.83 (3083/11490) | 1.26                             | 1.06                 | 0.05 | 0.96 | 1.18  | 0.255   |
|                                       | Top 10% vs Rest of population | 29.09 (398/1368)                                                                                 | 26.87 (3480/12952) | 2.23                             | 1.17                 | 0.07 | 1.01 | 1.34  | 0.032   |
|                                       | Top 5% vs Rest of population  | 30.53 (218/714)                                                                                  | 26.90 (3660/13606) | 3.63                             | 1.24                 | 0.10 | 1.03 | 1.49  | 0.024   |
| Meta-analysis EUR<br>N=44,958         | Top 40% vs Rest of population |                                                                                                  |                    |                                  | 1.27                 | 0.03 | 1.19 | 1.35  | 2.3E-13 |
|                                       | Top 30% vs Rest of population |                                                                                                  |                    |                                  | 1.25                 | 0.03 | 1.17 | 1.33  | 7.0E-11 |
|                                       | Top 20% vs Rest of population |                                                                                                  |                    |                                  | 1.26                 | 0.04 | 1.17 | 1.36  | 9.2E-10 |
|                                       | Top 10% vs Rest of population |                                                                                                  |                    |                                  | 1.38                 | 0.05 | 1.26 | 1.53  | 6.5E-11 |
|                                       | Top 5% vs Rest of population  |                                                                                                  |                    |                                  | 1.43                 | 0.07 | 1.25 | 1.63  | 1.0E-07 |
| <b>African (AFR) ancestry</b>         |                               |                                                                                                  |                    |                                  |                      |      |      |       |         |
| AncestryDNA AFR<br>N=1,629            | Top 40% vs Rest of population | 8.9                                                                                              | 7.88               | 1.01                             | 1.33                 | 0.23 | 0.84 | 2.09  | 0.220   |
|                                       | Top 30% vs Rest of population | 8.59                                                                                             | 8.16               | 0.43                             | 1.18                 | 0.25 | 0.73 | 1.91  | 0.499   |
|                                       | Top 20% vs Rest of population | 9.35                                                                                             | 8.03               | 1.32                             | 1.49                 | 0.28 | 0.86 | 2.55  | 0.152   |
|                                       | Top 10% vs Rest of population | 6.88                                                                                             | 8.44               | -1.57                            | 1.00                 | 0.41 | 0.45 | 2.21  | 0.993   |
|                                       | Top 5% vs Rest of population  | 6.1                                                                                              | 8.4                | -2.31                            | 0.73                 | 0.58 | 0.23 | 2.28  | 0.587   |
| UKB AFR<br>N=620                      | Top 40% vs Rest of population | 28.63 (71/248)                                                                                   | 20.70 (77/372)     | 7.93                             | 1.62                 | 0.24 | 1.00 | 2.60  | 0.048   |
|                                       | Top 30% vs Rest of population | 27.57 (51/185)                                                                                   | 22.30 (97/435)     | 5.27                             | 1.37                 | 0.26 | 0.83 | 2.27  | 0.220   |
|                                       | Top 20% vs Rest of population | 28.23 (35/124)                                                                                   | 22.78 (113/496)    | 5.44                             | 1.43                 | 0.29 | 0.80 | 2.52  | 0.224   |
|                                       | Top 10% vs Rest of population | 37.70 (23/61)                                                                                    | 22.36 (125/559)    | 15.34                            | 2.61                 | 0.37 | 1.25 | 5.42  | 0.010   |
|                                       | Top 5% vs Rest of population  | 41.94 (13/31)                                                                                    | 22.92 (135/589)    | 19.02                            | 3.12                 | 0.52 | 1.13 | 8.58  | 0.028   |
| PMBB AFR<br>N=349                     | Top 40% vs Rest of population | 45.00 (63/140)                                                                                   | 33.01 (69/209)     | 11.99                            | 1.92                 | 0.41 | 1.20 | 5.88  | 0.016   |
|                                       | Top 30% vs Rest of population | 43.81 (46/105)                                                                                   | 35.25 (86/244)     | 8.56                             | 2.43                 | 0.45 | 1.38 | 7.97  | 7.2E-03 |
|                                       | Top 20% vs Rest of population | 44.29 (31/70)                                                                                    | 36.20 (101/279)    | 8.08                             | 1.91                 | 0.50 | 0.97 | 6.80  | 0.058   |
|                                       | Top 10% vs Rest of population | 42.86 (15/35)                                                                                    | 37.26 (117/314)    | 5.60                             | 1.73                 | 0.72 | 0.57 | 9.58  | 0.241   |
|                                       | Top 5% vs Rest of population  | 50.00 (9/18)                                                                                     | 37.16 (123/331)    | 12.84                            | 2.30                 | 1.01 | 0.48 | 25.16 | 0.219   |
| Meta-analysis AFR<br>N=2,500          | Top 40% vs Rest of population |                                                                                                  |                    |                                  | 1.52                 | 0.15 | 1.12 | 2.05  | 0.007   |
|                                       | Top 30% vs Rest of population |                                                                                                  |                    |                                  | 1.39                 | 0.17 | 1.00 | 1.93  | 5.1E-02 |
|                                       | Top 20% vs Rest of population |                                                                                                  |                    |                                  | 1.52                 | 0.19 | 1.05 | 2.19  | 0.026   |

|                                                                                                                                                                                                                                                                                                                                                                                                                                                            |                               |                |                 |       |      |      |      |      |         |
|------------------------------------------------------------------------------------------------------------------------------------------------------------------------------------------------------------------------------------------------------------------------------------------------------------------------------------------------------------------------------------------------------------------------------------------------------------|-------------------------------|----------------|-----------------|-------|------|------|------|------|---------|
| N=2,570                                                                                                                                                                                                                                                                                                                                                                                                                                                    | Top 10% vs Rest of population |                |                 |       | 1.70 | 0.26 | 1.03 | 2.81 | 0.038   |
|                                                                                                                                                                                                                                                                                                                                                                                                                                                            | Top 5% vs Rest of population  |                |                 |       | 1.71 | 0.36 | 0.84 | 3.47 | 0.140   |
| <b>Admixed American (AMR) and South Asian (SAS) ancestries</b>                                                                                                                                                                                                                                                                                                                                                                                             |                               |                |                 |       |      |      |      |      |         |
| AncestryDNA AMR<br>N=3,752                                                                                                                                                                                                                                                                                                                                                                                                                                 | Top 40% vs Rest of population | 5.89           | 4.91            | 0.98  | 1.16 | 0.16 | 0.85 | 1.60 | 0.343   |
|                                                                                                                                                                                                                                                                                                                                                                                                                                                            | Top 30% vs Rest of population | 6.9            | 4.63            | 2.27  | 1.41 | 0.16 | 1.02 | 1.95 | 0.037   |
|                                                                                                                                                                                                                                                                                                                                                                                                                                                            | Top 20% vs Rest of population | 7.81           | 4.69            | 3.12  | 1.62 | 0.18 | 1.14 | 2.30 | 6.8E-03 |
|                                                                                                                                                                                                                                                                                                                                                                                                                                                            | Top 10% vs Rest of population | 8.24           | 4.98            | 3.27  | 1.56 | 0.23 | 1.00 | 2.43 | 0.050   |
|                                                                                                                                                                                                                                                                                                                                                                                                                                                            | Top 5% vs Rest of population  | 7.98           | 5.16            | 2.82  | 1.22 | 0.32 | 0.65 | 2.28 | 0.530   |
| UKB SAS<br>N=760                                                                                                                                                                                                                                                                                                                                                                                                                                           | Top 40% vs Rest of population | 22.37 (68/304) | 18.86 (86/456)  | 3.51  | 1.37 | 0.23 | 0.86 | 2.16 | 0.183   |
|                                                                                                                                                                                                                                                                                                                                                                                                                                                            | Top 30% vs Rest of population | 21.93 (50/228) | 19.55 (104/532) | 2.38  | 1.34 | 0.25 | 0.82 | 2.18 | 0.243   |
|                                                                                                                                                                                                                                                                                                                                                                                                                                                            | Top 20% vs Rest of population | 23.84 (36/151) | 19.38 (118/609) | 4.47  | 1.37 | 0.28 | 0.80 | 2.35 | 0.256   |
|                                                                                                                                                                                                                                                                                                                                                                                                                                                            | Top 10% vs Rest of population | 25.00 (19/76)  | 19.74 (135/684) | 5.26  | 1.42 | 0.35 | 0.72 | 2.82 | 0.316   |
|                                                                                                                                                                                                                                                                                                                                                                                                                                                            | Top 5% vs Rest of population  | 36.84 (14/38)  | 19.39 (140/722) | 17.45 | 3.18 | 0.46 | 1.29 | 7.79 | 0.012   |
| * Logistic regression model adjusted for age, sex, age x sex, BMI, ancestry-informative PCs, REGENIE genome-wide predictor (to account for family structure) and clinical risk factors associated with risk of hospitalization and severe disease: chronic kidney disease, diabetes, immunosuppressive disease, chronic obstructive pulmonary disease or other chronic respiratory disease, cardiovascular disease, hypertension (see methods for details) |                               |                |                 |       |      |      |      |      |         |



**Supplementary Table 19. Association between a 6-SNP genetic risk score (GRS) and risk of severe disease among COVID-19 cases.**

| Population, total N<br>COVID-19 cases                          | GRS Group                     | Risk of severe disease among COVID-19 cases<br>(N positive and severe / N positive) x 100 |                    | Unadjusted<br>Risk<br>Difference | Adjusted Odds Ratio*                                  |      |      |      |         |
|----------------------------------------------------------------|-------------------------------|-------------------------------------------------------------------------------------------|--------------------|----------------------------------|-------------------------------------------------------|------|------|------|---------|
|                                                                |                               | Highest GRS group                                                                         | Rest of Population |                                  | Estimate                                              | SE   | LCI  | UCI  | P-value |
| <b>European (EUR) ancestry</b>                                 |                               |                                                                                           |                    |                                  |                                                       |      |      |      |         |
| AncestryDNA EUR<br>N=25,353                                    | Top 40% vs Rest of population | 3.33 (331/9947)                                                                           | 2.18 (336/15406)   | 1.15                             | 1.58                                                  | 0.08 | 1.35 | 1.87 | 3.0E-08 |
|                                                                | Top 30% vs Rest of population | 3.60 (270/7501)                                                                           | 2.22 (397/17852)   | 1.38                             | 1.69                                                  | 0.08 | 1.43 | 1.99 | 7.9E-10 |
|                                                                | Top 20% vs Rest of population | 3.96 (199/5029)                                                                           | 2.30 (468/20324)   | 1.65                             | 1.74                                                  | 0.09 | 1.45 | 2.08 | 1.5E-09 |
|                                                                | Top 10% vs Rest of population | 4.36 (110/2522)                                                                           | 2.44 (557/22831)   | 1.92                             | 1.72                                                  | 0.11 | 1.37 | 2.15 | 2.0E-06 |
|                                                                | Top 5% vs Rest of population  | 4.79                                                                                      | 2.52               | 2.26                             | 1.64                                                  | 0.15 | 1.22 | 2.20 | 9.9E-04 |
| GHS EUR<br>N=5,285                                             | Top 40% vs Rest of population | 6.91 (146/2114)                                                                           | 5.55 (176/3171)    | 1.36                             | 1.26                                                  | 0.13 | 0.98 | 1.61 | 0.071   |
|                                                                | Top 30% vs Rest of population | 7.19 (114/1586)                                                                           | 5.62 (208/3699)    | 1.56                             | 1.27                                                  | 0.13 | 0.98 | 1.64 | 0.074   |
|                                                                | Top 20% vs Rest of population | 7.85 (83/1057)                                                                            | 5.65 (239/4228)    | 2.20                             | 1.33                                                  | 0.15 | 1.00 | 1.78 | 0.050   |
|                                                                | Top 10% vs Rest of population | 6.81 (36/529)                                                                             | 6.01 (286/4756)    | 0.79                             | 1.03                                                  | 0.20 | 0.69 | 1.53 | 0.877   |
|                                                                | Top 5% vs Rest of population  | 6.04 (16/265)                                                                             | 6.10 (306/5020)    | -0.06                            | 0.76                                                  | 0.30 | 0.42 | 1.36 | 0.355   |
| UKB EUR<br>N=14,320                                            | Top 40% vs Rest of population | 7.98 (418/5235)                                                                           | 5.87 (533/9085)    | 2.12                             | 1.43                                                  | 0.07 | 1.24 | 1.66 | 1.4E-06 |
|                                                                | Top 30% vs Rest of population | 8.39 (359/4279)                                                                           | 5.90 (592/10041)   | 2.49                             | 1.49                                                  | 0.08 | 1.28 | 1.73 | 2.5E-07 |
|                                                                | Top 20% vs Rest of population | 8.73 (247/2830)                                                                           | 6.13 (704/11490)   | 2.60                             | 1.44                                                  | 0.09 | 1.21 | 1.70 | 2.5E-05 |
|                                                                | Top 10% vs Rest of population | 9.58 (131/1368)                                                                           | 6.33 (820/12952)   | 3.24                             | 1.65                                                  | 0.11 | 1.33 | 2.05 | 6.0E-06 |
|                                                                | Top 5% vs Rest of population  | 11.06 (79/714)                                                                            | 6.41 (872/13606)   | 4.66                             | 2.00                                                  | 0.14 | 1.52 | 2.64 | 7.5E-07 |
| Meta-analysis EUR<br>N=44,958                                  | Top 40% vs Rest of population | NA                                                                                        |                    |                                  | 1.46                                                  | 0.05 | 1.32 | 1.61 | 1.3E-13 |
|                                                                | Top 30% vs Rest of population |                                                                                           |                    |                                  | 1.52                                                  | 0.05 | 1.37 | 1.68 | 1.2E-15 |
|                                                                | Top 20% vs Rest of population |                                                                                           |                    |                                  | 1.53                                                  | 0.06 | 1.37 | 1.71 | 1.4E-13 |
|                                                                | Top 10% vs Rest of population |                                                                                           |                    |                                  | 1.58                                                  | 0.07 | 1.36 | 1.82 | 7.1E-10 |
|                                                                | Top 5% vs Rest of population  |                                                                                           |                    |                                  | 1.66                                                  | 0.10 | 1.37 | 2.01 | 1.6E-07 |
| <b>African (AFR) ancestry</b>                                  |                               |                                                                                           |                    |                                  |                                                       |      |      |      |         |
| AncestryDNA AFR<br>N=1,629                                     | Top 40% vs Rest of population | 4.45                                                                                      | 3.38               | 1.07                             | Number of severe cases too small for analysis (N<100) |      |      |      |         |
|                                                                | Top 30% vs Rest of population | 4.09                                                                                      | 3.68               | 0.41                             |                                                       |      |      |      |         |
|                                                                | Top 20% vs Rest of population | 4.36                                                                                      | 3.67               | 0.69                             |                                                       |      |      |      |         |
|                                                                | Top 10% vs Rest of population | 2.50                                                                                      | 3.95               | -1.45                            |                                                       |      |      |      |         |
|                                                                | Top 5% vs Rest of population  | 2.44                                                                                      | 3.88               | -1.44                            |                                                       |      |      |      |         |
| UKB AFR<br>N=620                                               | Top 40% vs Rest of population | 5.65 (14/248)                                                                             | 7.80 (29/372)      | -2.15                            | Number of severe cases too small for analysis (N=43)  |      |      |      |         |
|                                                                | Top 30% vs Rest of population | 5.95 (11/185)                                                                             | 7.36 (32/435)      | -1.41                            |                                                       |      |      |      |         |
|                                                                | Top 20% vs Rest of population | 7.26 (9/124)                                                                              | 6.85 (34/496)      | 0.40                             |                                                       |      |      |      |         |
|                                                                | Top 10% vs Rest of population | 11.48 (7/61)                                                                              | 6.44 (36/559)      | 5.04                             |                                                       |      |      |      |         |
|                                                                | Top 5% vs Rest of population  | 9.68 (3/31)                                                                               | 6.79 (40/589)      | 2.89                             |                                                       |      |      |      |         |
| PMBB AFR<br>N=349                                              | Top 40% vs Rest of population | 6.43 (9/140)                                                                              | 7.66 (16/209)      | -1.23                            | Number of severe cases too small for analysis (N=25)  |      |      |      |         |
|                                                                | Top 30% vs Rest of population | 6.67 (7/105)                                                                              | 7.38 (18/244)      | -0.71                            |                                                       |      |      |      |         |
|                                                                | Top 20% vs Rest of population | 10.00 (7/70)                                                                              | 6.45 (18/279)      | 3.55                             |                                                       |      |      |      |         |
|                                                                | Top 10% vs Rest of population | 8.57 (3/35)                                                                               | 7.01 (22/314)      | 1.57                             |                                                       |      |      |      |         |
|                                                                | Top 5% vs Rest of population  | 5.56 (1/18)                                                                               | 7.25 (24/331)      | -1.70                            |                                                       |      |      |      |         |
| <b>Admixed American (AMR) and South Asian (SAS) ancestries</b> |                               |                                                                                           |                    |                                  |                                                       |      |      |      |         |
|                                                                | Top 40% vs Rest of population | 2.61                                                                                      | 1.86               | 0.75                             |                                                       |      |      |      |         |

|                                                                                                                                                                                                                                                                                                                                                                                                                                                            |                               |               |               |      |                                                       |
|------------------------------------------------------------------------------------------------------------------------------------------------------------------------------------------------------------------------------------------------------------------------------------------------------------------------------------------------------------------------------------------------------------------------------------------------------------|-------------------------------|---------------|---------------|------|-------------------------------------------------------|
| AncestryDNA AMR<br>N=3,752                                                                                                                                                                                                                                                                                                                                                                                                                                 | Top 30% vs Rest of population | 3.23          | 1.71          | 1.52 | Number of severe cases too small for analysis (N<100) |
|                                                                                                                                                                                                                                                                                                                                                                                                                                                            | Top 20% vs Rest of population | 3.90          | 1.73          | 2.17 |                                                       |
|                                                                                                                                                                                                                                                                                                                                                                                                                                                            | Top 10% vs Rest of population | 4.26          | 1.93          | 2.33 |                                                       |
|                                                                                                                                                                                                                                                                                                                                                                                                                                                            | Top 5% vs Rest of population  | 4.79          | 2.02          | 2.77 |                                                       |
| UKB SAS<br>N=760                                                                                                                                                                                                                                                                                                                                                                                                                                           | Top 40% vs Rest of population | 4.61 (14/304) | 3.95 (18/456) | 0.66 | Number of severe cases too small for analysis (N=32)  |
|                                                                                                                                                                                                                                                                                                                                                                                                                                                            | Top 30% vs Rest of population | 4.82 (11/228) | 3.95 (21/532) | 0.88 |                                                       |
|                                                                                                                                                                                                                                                                                                                                                                                                                                                            | Top 20% vs Rest of population | 5.30 (8/151)  | 3.94 (24/609) | 1.36 |                                                       |
|                                                                                                                                                                                                                                                                                                                                                                                                                                                            | Top 10% vs Rest of population | 6.58 (5/76)   | 3.95 (27/684) | 2.63 |                                                       |
|                                                                                                                                                                                                                                                                                                                                                                                                                                                            | Top 5% vs Rest of population  | 7.89 (3/38)   | 4.02 (29/722) | 3.88 |                                                       |
| * Logistic regression model adjusted for age, sex, age x sex, BMI, ancestry-informative PCs, REGENIE genome-wide predictor (to account for family structure) and clinical risk factors associated with risk of hospitalization and severe disease: chronic kidney disease, diabetes, immunosuppressive disease, chronic obstructive pulmonary disease or other chronic respiratory disease, cardiovascular disease, hypertension (see methods for details) |                               |               |               |      |                                                       |

**Supplementary Table 20. Association between a 6-SNP genetic risk score (GRS) and risk of hospitalization and severe disease in individuals of European ancestry, after stratifying COVID-19 cases by pre-existing clinical risk factor status for severe COVID-19.**

| Population, total N COVID-19 cases                                                                                                                                                                                                                                                                                  | Clinical Risk Level | N COVID-19 cases | Risk among COVID-19 cases<br>(N positive and [hospitalized or severe] / N positive) x 100 |                    | Unadjusted Risk Difference | Adjusted Odds Ratio** |      |      |      |         |
|---------------------------------------------------------------------------------------------------------------------------------------------------------------------------------------------------------------------------------------------------------------------------------------------------------------------|---------------------|------------------|-------------------------------------------------------------------------------------------|--------------------|----------------------------|-----------------------|------|------|------|---------|
|                                                                                                                                                                                                                                                                                                                     |                     |                  | Top 10% GRS                                                                               | Rest of Population |                            | Estimate              | SE   | LCI  | UCI  | P-value |
| <b>Risk of hospitalization</b>                                                                                                                                                                                                                                                                                      |                     |                  |                                                                                           |                    |                            |                       |      |      |      |         |
| AncestryDNA EUR<br>N=25,353                                                                                                                                                                                                                                                                                         | Lower               | 12,464           | 4.07                                                                                      | 2.39               | 1.69                       | 1.70                  | 0.16 | 1.25 | 2.31 | 6.8E-04 |
|                                                                                                                                                                                                                                                                                                                     | High                | 12,889           | 14.14                                                                                     | 8.49               | 5.64                       | 1.80                  | 0.09 | 1.51 | 2.15 | 5.3E-11 |
| UKB EUR<br>N=14,320                                                                                                                                                                                                                                                                                                 | Lower               | 8,912            | 17.86 (152/851)                                                                           | 15.72 (1267/8061)  | 2.14                       | 1.21                  | 0.10 | 1.00 | 1.46 | 0.051   |
|                                                                                                                                                                                                                                                                                                                     | High                | 5,408            | 47.58 (246/517)                                                                           | 45.25 (2213/4891)  | 2.34                       | 1.09                  | 0.10 | 0.91 | 1.32 | 0.343   |
| GHS EUR<br>N=5,285                                                                                                                                                                                                                                                                                                  | Lower               | 1,537            | 5.48 (8/146)                                                                              | 2.95 (41/1391)     | 2.53                       | 1.98                  | 0.42 | 0.87 | 4.53 | 0.105   |
|                                                                                                                                                                                                                                                                                                                     | High                | 3,748            | 23.24 (89/383)                                                                            | 18.96 (638/3365)   | 4.28                       | 1.21                  | 0.14 | 0.92 | 1.59 | 0.171   |
| Meta-analysis EUR<br>N=44,958                                                                                                                                                                                                                                                                                       | Lower               | 22,913           | NA                                                                                        |                    |                            | 1.35                  | 0.08 | 1.15 | 1.58 | 2.1E-04 |
|                                                                                                                                                                                                                                                                                                                     | High                | 22,045           | NA                                                                                        |                    |                            | 1.39                  | 0.06 | 1.23 | 1.56 | 3.7E-08 |
| <b>Risk of severe disease</b>                                                                                                                                                                                                                                                                                       |                     |                  |                                                                                           |                    |                            |                       |      |      |      |         |
| AncestryDNA EUR<br>N=25,353                                                                                                                                                                                                                                                                                         | Lower               | 12,464           | 1.64                                                                                      | 0.78               | 0.87                       | 2.04                  | 0.25 | 1.25 | 3.33 | 4.2E-03 |
|                                                                                                                                                                                                                                                                                                                     | High                | 12,889           | 7.15                                                                                      | 4.04               | 3.11                       | 1.70                  | 0.13 | 1.33 | 2.17 | 2.5E-05 |
| UKB EUR<br>N=14,320                                                                                                                                                                                                                                                                                                 | Lower               | 8,912            | 3.41 (29/851)                                                                             | 2.25 (181/8061)    | 1.16                       | 1.58                  | 0.21 | 1.05 | 2.37 | 0.027   |
|                                                                                                                                                                                                                                                                                                                     | High                | 5,408            | 19.73 (102/517)                                                                           | 13.06 (639/4891)   | 6.66                       | 1.60                  | 0.12 | 1.25 | 2.03 | 1.5E-04 |
| Meta-analysis EUR<br>N=39,673                                                                                                                                                                                                                                                                                       | Lower               | 21,376           | NA                                                                                        |                    |                            | 1.75                  | 0.16 | 1.28 | 2.40 | 4.2E-04 |
|                                                                                                                                                                                                                                                                                                                     | High                | 18,297           | NA                                                                                        |                    |                            | 1.65                  | 0.09 | 1.39 | 1.96 | 1.5E-08 |
| * High clinical risk included individuals with any of the following criteria: age $\geq$ 65, BMI $\geq$ 35, chronic kidney disease, diabetes, immunosuppressive disease, or age $\geq$ 55 and presence of chronic obstructive pulmonary disease, cardiovascular disease, or hypertension (see methods for details). |                     |                  |                                                                                           |                    |                            |                       |      |      |      |         |
| ** Logistic regression model adjusted for sex, ancestry-informative PCs and REGENIE genome-wide predictor to account for family structure.                                                                                                                                                                          |                     |                  |                                                                                           |                    |                            |                       |      |      |      |         |
